# Supplementary material for: Loss of linker histone H1 in the maternal genome influences DEMETER-mediated demethylation and affects the endosperm DNA methylation landscape
Source: Front Plant Sci. 2022 Dec 22;13:1070397. doi: 10.3389/fpls.2022.1070397 (PMC9813442; doi:10.3389/fpls.2022.1070397)
Supplement: Supplementary file 2 [file Table_1.xlsx]

## Sheet: wt_EM_EN_DMR list
Supplemental dataset1 wild-type embryo vs endosperm DMR list with tair8 coordinates
chr1	.	wtEM_EN_g6d3n6_DMR	801	950	1	.	150	.
chr1	.	wtEM_EN_g6d3n6_DMR	18101	18750	1	.	650	.
chr1	.	wtEM_EN_g6d3n6_DMR	55901	56550	1	.	650	.
chr1	.	wtEM_EN_g6d3n6_DMR	70651	70750	1	.	100	.
chr1	.	wtEM_EN_g6d3n6_DMR	76851	77400	1	.	550	.
chr1	.	wtEM_EN_g6d3n6_DMR	193351	193700	1	.	350	.
chr1	.	wtEM_EN_g6d3n6_DMR	213551	213700	1	.	150	.
chr1	.	wtEM_EN_g6d3n6_DMR	238351	238450	1	.	100	.
chr1	.	wtEM_EN_g6d3n6_DMR	258401	258500	1	.	100	.
chr1	.	wtEM_EN_g6d3n6_DMR	288951	289400	1	.	450	.
chr1	.	wtEM_EN_g6d3n6_DMR	376351	376600	1	.	250	.
chr1	.	wtEM_EN_g6d3n6_DMR	428051	428150	1	.	100	.
chr1	.	wtEM_EN_g6d3n6_DMR	431351	431450	1	.	100	.
chr1	.	wtEM_EN_g6d3n6_DMR	432001	432150	1	.	150	.
chr1	.	wtEM_EN_g6d3n6_DMR	433551	433800	1	.	250	.
chr1	.	wtEM_EN_g6d3n6_DMR	573101	573250	1	.	150	.
chr1	.	wtEM_EN_g6d3n6_DMR	670351	670900	1	.	550	.
chr1	.	wtEM_EN_g6d3n6_DMR	696451	696750	1	.	300	.
chr1	.	wtEM_EN_g6d3n6_DMR	726051	726150	1	.	100	.
chr1	.	wtEM_EN_g6d3n6_DMR	832251	832550	1	.	300	.
chr1	.	wtEM_EN_g6d3n6_DMR	833801	833900	1	.	100	.
chr1	.	wtEM_EN_g6d3n6_DMR	891051	891300	1	.	250	.
chr1	.	wtEM_EN_g6d3n6_DMR	946151	946350	1	.	200	.
chr1	.	wtEM_EN_g6d3n6_DMR	958551	958750	1	.	200	.
chr1	.	wtEM_EN_g6d3n6_DMR	1069551	1069650	1	.	100	.
chr1	.	wtEM_EN_g6d3n6_DMR	1184651	1184950	1	.	300	.
chr1	.	wtEM_EN_g6d3n6_DMR	1249701	1249850	1	.	150	.
chr1	.	wtEM_EN_g6d3n6_DMR	1276101	1276250	1	.	150	.
chr1	.	wtEM_EN_g6d3n6_DMR	1286851	1287000	1	.	150	.
chr1	.	wtEM_EN_g6d3n6_DMR	1352701	1353000	1	.	300	.
chr1	.	wtEM_EN_g6d3n6_DMR	1397401	1397500	1	.	100	.
chr1	.	wtEM_EN_g6d3n6_DMR	1441601	1441700	1	.	100	.
chr1	.	wtEM_EN_g6d3n6_DMR	1444351	1444550	1	.	200	.
chr1	.	wtEM_EN_g6d3n6_DMR	1488251	1488450	1	.	200	.
chr1	.	wtEM_EN_g6d3n6_DMR	1532551	1532800	1	.	250	.
chr1	.	wtEM_EN_g6d3n6_DMR	1579001	1579350	1	.	350	.
chr1	.	wtEM_EN_g6d3n6_DMR	1592401	1592500	1	.	100	.
chr1	.	wtEM_EN_g6d3n6_DMR	1598351	1598500	1	.	150	.
chr1	.	wtEM_EN_g6d3n6_DMR	1617751	1617900	1	.	150	.
chr1	.	wtEM_EN_g6d3n6_DMR	1655701	1656800	1	.	1100	.
chr1	.	wtEM_EN_g6d3n6_DMR	1676951	1677100	1	.	150	.
chr1	.	wtEM_EN_g6d3n6_DMR	1728701	1729200	1	.	500	.
chr1	.	wtEM_EN_g6d3n6_DMR	1736201	1737300	1	.	1100	.
chr1	.	wtEM_EN_g6d3n6_DMR	1810301	1810500	1	.	200	.
chr1	.	wtEM_EN_g6d3n6_DMR	1875801	1875950	1	.	150	.
chr1	.	wtEM_EN_g6d3n6_DMR	1876351	1876750	1	.	400	.
chr1	.	wtEM_EN_g6d3n6_DMR	1968301	1968550	1	.	250	.
chr1	.	wtEM_EN_g6d3n6_DMR	1983401	1983500	1	.	100	.
chr1	.	wtEM_EN_g6d3n6_DMR	2028851	2028950	1	.	100	.
chr1	.	wtEM_EN_g6d3n6_DMR	2271151	2271400	1	.	250	.
chr1	.	wtEM_EN_g6d3n6_DMR	2292451	2293000	1	.	550	.
chr1	.	wtEM_EN_g6d3n6_DMR	2296001	2296200	1	.	200	.
chr1	.	wtEM_EN_g6d3n6_DMR	2331651	2331750	1	.	100	.
chr1	.	wtEM_EN_g6d3n6_DMR	2382301	2383650	1	.	1350	.
chr1	.	wtEM_EN_g6d3n6_DMR	2386101	2386550	1	.	450	.
chr1	.	wtEM_EN_g6d3n6_DMR	2578151	2578350	1	.	200	.
chr1	.	wtEM_EN_g6d3n6_DMR	2588151	2588350	1	.	200	.
chr1	.	wtEM_EN_g6d3n6_DMR	2633951	2634100	1	.	150	.
chr1	.	wtEM_EN_g6d3n6_DMR	2723001	2723100	1	.	100	.
chr1	.	wtEM_EN_g6d3n6_DMR	2724851	2725700	1	.	850	.
chr1	.	wtEM_EN_g6d3n6_DMR	2726101	2727400	1	.	1300	.
chr1	.	wtEM_EN_g6d3n6_DMR	2728651	2728900	1	.	250	.
chr1	.	wtEM_EN_g6d3n6_DMR	2763951	2764700	1	.	750	.
chr1	.	wtEM_EN_g6d3n6_DMR	2767351	2767550	1	.	200	.
chr1	.	wtEM_EN_g6d3n6_DMR	2836001	2836350	1	.	350	.
chr1	.	wtEM_EN_g6d3n6_DMR	2900801	2901000	1	.	200	.
chr1	.	wtEM_EN_g6d3n6_DMR	2917801	2918150	1	.	350	.
chr1	.	wtEM_EN_g6d3n6_DMR	2922301	2922400	1	.	100	.
chr1	.	wtEM_EN_g6d3n6_DMR	2937251	2937450	1	.	200	.
chr1	.	wtEM_EN_g6d3n6_DMR	2993401	2993800	1	.	400	.
chr1	.	wtEM_EN_g6d3n6_DMR	3023451	3023600	1	.	150	.
chr1	.	wtEM_EN_g6d3n6_DMR	3039601	3039850	1	.	250	.
chr1	.	wtEM_EN_g6d3n6_DMR	3063451	3063650	1	.	200	.
chr1	.	wtEM_EN_g6d3n6_DMR	3073501	3073850	1	.	350	.
chr1	.	wtEM_EN_g6d3n6_DMR	3111201	3111300	1	.	100	.
chr1	.	wtEM_EN_g6d3n6_DMR	3115051	3115200	1	.	150	.
chr1	.	wtEM_EN_g6d3n6_DMR	3151901	3152400	1	.	500	.
chr1	.	wtEM_EN_g6d3n6_DMR	3250601	3250850	1	.	250	.
chr1	.	wtEM_EN_g6d3n6_DMR	3331101	3331300	1	.	200	.
chr1	.	wtEM_EN_g6d3n6_DMR	3340301	3340650	1	.	350	.
chr1	.	wtEM_EN_g6d3n6_DMR	3343601	3345200	1	.	1600	.
chr1	.	wtEM_EN_g6d3n6_DMR	3357301	3357400	1	.	100	.
chr1	.	wtEM_EN_g6d3n6_DMR	3365251	3365350	1	.	100	.
chr1	.	wtEM_EN_g6d3n6_DMR	3384951	3385100	1	.	150	.
chr1	.	wtEM_EN_g6d3n6_DMR	3393701	3393850	1	.	150	.
chr1	.	wtEM_EN_g6d3n6_DMR	3413001	3413150	1	.	150	.
chr1	.	wtEM_EN_g6d3n6_DMR	3413651	3413750	1	.	100	.
chr1	.	wtEM_EN_g6d3n6_DMR	3498001	3498250	1	.	250	.
chr1	.	wtEM_EN_g6d3n6_DMR	3498651	3498900	1	.	250	.
chr1	.	wtEM_EN_g6d3n6_DMR	3546801	3547150	1	.	350	.
chr1	.	wtEM_EN_g6d3n6_DMR	3569201	3569450	1	.	250	.
chr1	.	wtEM_EN_g6d3n6_DMR	3595951	3596050	1	.	100	.
chr1	.	wtEM_EN_g6d3n6_DMR	3602701	3603050	1	.	350	.
chr1	.	wtEM_EN_g6d3n6_DMR	3608401	3608650	1	.	250	.
chr1	.	wtEM_EN_g6d3n6_DMR	3621801	3622050	1	.	250	.
chr1	.	wtEM_EN_g6d3n6_DMR	3687001	3687250	1	.	250	.
chr1	.	wtEM_EN_g6d3n6_DMR	3729501	3729600	1	.	100	.
chr1	.	wtEM_EN_g6d3n6_DMR	3858951	3859150	1	.	200	.
chr1	.	wtEM_EN_g6d3n6_DMR	3897951	3898450	1	.	500	.
chr1	.	wtEM_EN_g6d3n6_DMR	3921051	3921200	1	.	150	.
chr1	.	wtEM_EN_g6d3n6_DMR	3922151	3923100	1	.	950	.
chr1	.	wtEM_EN_g6d3n6_DMR	3926351	3926550	1	.	200	.
chr1	.	wtEM_EN_g6d3n6_DMR	3932851	3933050	1	.	200	.
chr1	.	wtEM_EN_g6d3n6_DMR	3980401	3980600	1	.	200	.
chr1	.	wtEM_EN_g6d3n6_DMR	3982601	3984050	1	.	1450	.
chr1	.	wtEM_EN_g6d3n6_DMR	3984401	3984650	1	.	250	.
chr1	.	wtEM_EN_g6d3n6_DMR	4012501	4012600	1	.	100	.
chr1	.	wtEM_EN_g6d3n6_DMR	4016151	4016300	1	.	150	.
chr1	.	wtEM_EN_g6d3n6_DMR	4040751	4041350	1	.	600	.
chr1	.	wtEM_EN_g6d3n6_DMR	4047651	4047750	1	.	100	.
chr1	.	wtEM_EN_g6d3n6_DMR	4093601	4093950	1	.	350	.
chr1	.	wtEM_EN_g6d3n6_DMR	4111301	4111450	1	.	150	.
chr1	.	wtEM_EN_g6d3n6_DMR	4252401	4252850	1	.	450	.
chr1	.	wtEM_EN_g6d3n6_DMR	4267751	4267950	1	.	200	.
chr1	.	wtEM_EN_g6d3n6_DMR	4293151	4293350	1	.	200	.
chr1	.	wtEM_EN_g6d3n6_DMR	4306951	4307100	1	.	150	.
chr1	.	wtEM_EN_g6d3n6_DMR	4321801	4321950	1	.	150	.
chr1	.	wtEM_EN_g6d3n6_DMR	4363201	4363400	1	.	200	.
chr1	.	wtEM_EN_g6d3n6_DMR	4407701	4408000	1	.	300	.
chr1	.	wtEM_EN_g6d3n6_DMR	4408501	4408700	1	.	200	.
chr1	.	wtEM_EN_g6d3n6_DMR	4409301	4409600	1	.	300	.
chr1	.	wtEM_EN_g6d3n6_DMR	4415601	4416100	1	.	500	.
chr1	.	wtEM_EN_g6d3n6_DMR	4436851	4437400	1	.	550	.
chr1	.	wtEM_EN_g6d3n6_DMR	4438251	4438350	1	.	100	.
chr1	.	wtEM_EN_g6d3n6_DMR	4493901	4494050	1	.	150	.
chr1	.	wtEM_EN_g6d3n6_DMR	4595101	4595600	1	.	500	.
chr1	.	wtEM_EN_g6d3n6_DMR	4597051	4597400	1	.	350	.
chr1	.	wtEM_EN_g6d3n6_DMR	4616951	4617400	1	.	450	.
chr1	.	wtEM_EN_g6d3n6_DMR	4685251	4685600	1	.	350	.
chr1	.	wtEM_EN_g6d3n6_DMR	4764951	4765500	1	.	550	.
chr1	.	wtEM_EN_g6d3n6_DMR	4780151	4780250	1	.	100	.
chr1	.	wtEM_EN_g6d3n6_DMR	4860551	4860650	1	.	100	.
chr1	.	wtEM_EN_g6d3n6_DMR	4862351	4862700	1	.	350	.
chr1	.	wtEM_EN_g6d3n6_DMR	4985751	4986400	1	.	650	.
chr1	.	wtEM_EN_g6d3n6_DMR	4992751	4993250	1	.	500	.
chr1	.	wtEM_EN_g6d3n6_DMR	5008551	5008650	1	.	100	.
chr1	.	wtEM_EN_g6d3n6_DMR	5056101	5056350	1	.	250	.
chr1	.	wtEM_EN_g6d3n6_DMR	5099001	5099350	1	.	350	.
chr1	.	wtEM_EN_g6d3n6_DMR	5101851	5102000	1	.	150	.
chr1	.	wtEM_EN_g6d3n6_DMR	5171801	5172050	1	.	250	.
chr1	.	wtEM_EN_g6d3n6_DMR	5174151	5174550	1	.	400	.
chr1	.	wtEM_EN_g6d3n6_DMR	5234351	5234500	1	.	150	.
chr1	.	wtEM_EN_g6d3n6_DMR	5351851	5352050	1	.	200	.
chr1	.	wtEM_EN_g6d3n6_DMR	5352651	5352750	1	.	100	.
chr1	.	wtEM_EN_g6d3n6_DMR	5354751	5355500	1	.	750	.
chr1	.	wtEM_EN_g6d3n6_DMR	5363901	5364000	1	.	100	.
chr1	.	wtEM_EN_g6d3n6_DMR	5389651	5389850	1	.	200	.
chr1	.	wtEM_EN_g6d3n6_DMR	5391501	5391650	1	.	150	.
chr1	.	wtEM_EN_g6d3n6_DMR	5490851	5491150	1	.	300	.
chr1	.	wtEM_EN_g6d3n6_DMR	5500601	5500700	1	.	100	.
chr1	.	wtEM_EN_g6d3n6_DMR	5520051	5520150	1	.	100	.
chr1	.	wtEM_EN_g6d3n6_DMR	5550401	5550500	1	.	100	.
chr1	.	wtEM_EN_g6d3n6_DMR	5559601	5559800	1	.	200	.
chr1	.	wtEM_EN_g6d3n6_DMR	5690301	5690500	1	.	200	.
chr1	.	wtEM_EN_g6d3n6_DMR	5708951	5709050	1	.	100	.
chr1	.	wtEM_EN_g6d3n6_DMR	5724451	5724550	1	.	100	.
chr1	.	wtEM_EN_g6d3n6_DMR	5779451	5779550	1	.	100	.
chr1	.	wtEM_EN_g6d3n6_DMR	5849251	5849350	1	.	100	.
chr1	.	wtEM_EN_g6d3n6_DMR	5866651	5867100	1	.	450	.
chr1	.	wtEM_EN_g6d3n6_DMR	5911751	5911900	1	.	150	.
chr1	.	wtEM_EN_g6d3n6_DMR	5965851	5966500	1	.	650	.
chr1	.	wtEM_EN_g6d3n6_DMR	5971101	5971350	1	.	250	.
chr1	.	wtEM_EN_g6d3n6_DMR	5974851	5975750	1	.	900	.
chr1	.	wtEM_EN_g6d3n6_DMR	6040051	6040450	1	.	400	.
chr1	.	wtEM_EN_g6d3n6_DMR	6041101	6042400	1	.	1300	.
chr1	.	wtEM_EN_g6d3n6_DMR	6044101	6044750	1	.	650	.
chr1	.	wtEM_EN_g6d3n6_DMR	6045301	6045500	1	.	200	.
chr1	.	wtEM_EN_g6d3n6_DMR	6045951	6046100	1	.	150	.
chr1	.	wtEM_EN_g6d3n6_DMR	6046851	6047150	1	.	300	.
chr1	.	wtEM_EN_g6d3n6_DMR	6051001	6051100	1	.	100	.
chr1	.	wtEM_EN_g6d3n6_DMR	6084451	6084650	1	.	200	.
chr1	.	wtEM_EN_g6d3n6_DMR	6096151	6096250	1	.	100	.
chr1	.	wtEM_EN_g6d3n6_DMR	6140501	6141400	1	.	900	.
chr1	.	wtEM_EN_g6d3n6_DMR	6157951	6158800	1	.	850	.
chr1	.	wtEM_EN_g6d3n6_DMR	6169801	6170050	1	.	250	.
chr1	.	wtEM_EN_g6d3n6_DMR	6197551	6198100	1	.	550	.
chr1	.	wtEM_EN_g6d3n6_DMR	6235801	6236750	1	.	950	.
chr1	.	wtEM_EN_g6d3n6_DMR	6237451	6237650	1	.	200	.
chr1	.	wtEM_EN_g6d3n6_DMR	6357251	6358100	1	.	850	.
chr1	.	wtEM_EN_g6d3n6_DMR	6380651	6380950	1	.	300	.
chr1	.	wtEM_EN_g6d3n6_DMR	6402101	6402200	1	.	100	.
chr1	.	wtEM_EN_g6d3n6_DMR	6403101	6403250	1	.	150	.
chr1	.	wtEM_EN_g6d3n6_DMR	6406901	6407200	1	.	300	.
chr1	.	wtEM_EN_g6d3n6_DMR	6415601	6415700	1	.	100	.
chr1	.	wtEM_EN_g6d3n6_DMR	6425951	6426550	1	.	600	.
chr1	.	wtEM_EN_g6d3n6_DMR	6439551	6439700	1	.	150	.
chr1	.	wtEM_EN_g6d3n6_DMR	6454701	6455650	1	.	950	.
chr1	.	wtEM_EN_g6d3n6_DMR	6470401	6470650	1	.	250	.
chr1	.	wtEM_EN_g6d3n6_DMR	6472751	6473300	1	.	550	.
chr1	.	wtEM_EN_g6d3n6_DMR	6539951	6540250	1	.	300	.
chr1	.	wtEM_EN_g6d3n6_DMR	6573901	6575150	1	.	1250	.
chr1	.	wtEM_EN_g6d3n6_DMR	6588001	6588400	1	.	400	.
chr1	.	wtEM_EN_g6d3n6_DMR	6588851	6589500	1	.	650	.
chr1	.	wtEM_EN_g6d3n6_DMR	6597001	6597400	1	.	400	.
chr1	.	wtEM_EN_g6d3n6_DMR	6598551	6598800	1	.	250	.
chr1	.	wtEM_EN_g6d3n6_DMR	6618001	6618400	1	.	400	.
chr1	.	wtEM_EN_g6d3n6_DMR	6640301	6641000	1	.	700	.
chr1	.	wtEM_EN_g6d3n6_DMR	6664501	6664600	1	.	100	.
chr1	.	wtEM_EN_g6d3n6_DMR	6705651	6706050	1	.	400	.
chr1	.	wtEM_EN_g6d3n6_DMR	6707351	6707800	1	.	450	.
chr1	.	wtEM_EN_g6d3n6_DMR	6709451	6709700	1	.	250	.
chr1	.	wtEM_EN_g6d3n6_DMR	6718051	6718150	1	.	100	.
chr1	.	wtEM_EN_g6d3n6_DMR	6718901	6719000	1	.	100	.
chr1	.	wtEM_EN_g6d3n6_DMR	6720901	6721000	1	.	100	.
chr1	.	wtEM_EN_g6d3n6_DMR	6721501	6721600	1	.	100	.
chr1	.	wtEM_EN_g6d3n6_DMR	6729951	6730600	1	.	650	.
chr1	.	wtEM_EN_g6d3n6_DMR	6732901	6733100	1	.	200	.
chr1	.	wtEM_EN_g6d3n6_DMR	6736701	6737350	1	.	650	.
chr1	.	wtEM_EN_g6d3n6_DMR	6751851	6751950	1	.	100	.
chr1	.	wtEM_EN_g6d3n6_DMR	6820901	6821050	1	.	150	.
chr1	.	wtEM_EN_g6d3n6_DMR	6895801	6896050	1	.	250	.
chr1	.	wtEM_EN_g6d3n6_DMR	7023501	7024550	1	.	1050	.
chr1	.	wtEM_EN_g6d3n6_DMR	7079851	7080150	1	.	300	.
chr1	.	wtEM_EN_g6d3n6_DMR	7081101	7081750	1	.	650	.
chr1	.	wtEM_EN_g6d3n6_DMR	7092551	7092800	1	.	250	.
chr1	.	wtEM_EN_g6d3n6_DMR	7123151	7123300	1	.	150	.
chr1	.	wtEM_EN_g6d3n6_DMR	7145751	7146050	1	.	300	.
chr1	.	wtEM_EN_g6d3n6_DMR	7147951	7148300	1	.	350	.
chr1	.	wtEM_EN_g6d3n6_DMR	7148651	7148950	1	.	300	.
chr1	.	wtEM_EN_g6d3n6_DMR	7162301	7162400	1	.	100	.
chr1	.	wtEM_EN_g6d3n6_DMR	7201851	7202050	1	.	200	.
chr1	.	wtEM_EN_g6d3n6_DMR	7220451	7220550	1	.	100	.
chr1	.	wtEM_EN_g6d3n6_DMR	7249351	7249550	1	.	200	.
chr1	.	wtEM_EN_g6d3n6_DMR	7256001	7257000	1	.	1000	.
chr1	.	wtEM_EN_g6d3n6_DMR	7277701	7277800	1	.	100	.
chr1	.	wtEM_EN_g6d3n6_DMR	7279851	7280000	1	.	150	.
chr1	.	wtEM_EN_g6d3n6_DMR	7283451	7283750	1	.	300	.
chr1	.	wtEM_EN_g6d3n6_DMR	7313051	7313200	1	.	150	.
chr1	.	wtEM_EN_g6d3n6_DMR	7365051	7365150	1	.	100	.
chr1	.	wtEM_EN_g6d3n6_DMR	7373551	7373800	1	.	250	.
chr1	.	wtEM_EN_g6d3n6_DMR	7392301	7392550	1	.	250	.
chr1	.	wtEM_EN_g6d3n6_DMR	7394501	7394650	1	.	150	.
chr1	.	wtEM_EN_g6d3n6_DMR	7417251	7417350	1	.	100	.
chr1	.	wtEM_EN_g6d3n6_DMR	7475001	7475100	1	.	100	.
chr1	.	wtEM_EN_g6d3n6_DMR	7506001	7506100	1	.	100	.
chr1	.	wtEM_EN_g6d3n6_DMR	7541251	7541450	1	.	200	.
chr1	.	wtEM_EN_g6d3n6_DMR	7607501	7607600	1	.	100	.
chr1	.	wtEM_EN_g6d3n6_DMR	7665601	7665800	1	.	200	.
chr1	.	wtEM_EN_g6d3n6_DMR	7709451	7709900	1	.	450	.
chr1	.	wtEM_EN_g6d3n6_DMR	7710501	7711550	1	.	1050	.
chr1	.	wtEM_EN_g6d3n6_DMR	7755501	7756200	1	.	700	.
chr1	.	wtEM_EN_g6d3n6_DMR	7761401	7762150	1	.	750	.
chr1	.	wtEM_EN_g6d3n6_DMR	7766101	7766500	1	.	400	.
chr1	.	wtEM_EN_g6d3n6_DMR	7810151	7810300	1	.	150	.
chr1	.	wtEM_EN_g6d3n6_DMR	7833151	7833550	1	.	400	.
chr1	.	wtEM_EN_g6d3n6_DMR	7851801	7852150	1	.	350	.
chr1	.	wtEM_EN_g6d3n6_DMR	7879951	7880150	1	.	200	.
chr1	.	wtEM_EN_g6d3n6_DMR	7960151	7960400	1	.	250	.
chr1	.	wtEM_EN_g6d3n6_DMR	7960751	7961050	1	.	300	.
chr1	.	wtEM_EN_g6d3n6_DMR	7980901	7981200	1	.	300	.
chr1	.	wtEM_EN_g6d3n6_DMR	7985751	7986100	1	.	350	.
chr1	.	wtEM_EN_g6d3n6_DMR	8001701	8002100	1	.	400	.
chr1	.	wtEM_EN_g6d3n6_DMR	8016501	8016600	1	.	100	.
chr1	.	wtEM_EN_g6d3n6_DMR	8035951	8036100	1	.	150	.
chr1	.	wtEM_EN_g6d3n6_DMR	8053201	8053400	1	.	200	.
chr1	.	wtEM_EN_g6d3n6_DMR	8053751	8053900	1	.	150	.
chr1	.	wtEM_EN_g6d3n6_DMR	8121401	8121500	1	.	100	.
chr1	.	wtEM_EN_g6d3n6_DMR	8154151	8154250	1	.	100	.
chr1	.	wtEM_EN_g6d3n6_DMR	8160351	8160750	1	.	400	.
chr1	.	wtEM_EN_g6d3n6_DMR	8174451	8174600	1	.	150	.
chr1	.	wtEM_EN_g6d3n6_DMR	8236951	8237150	1	.	200	.
chr1	.	wtEM_EN_g6d3n6_DMR	8237551	8238900	1	.	1350	.
chr1	.	wtEM_EN_g6d3n6_DMR	8257501	8257750	1	.	250	.
chr1	.	wtEM_EN_g6d3n6_DMR	8266751	8267150	1	.	400	.
chr1	.	wtEM_EN_g6d3n6_DMR	8272901	8273050	1	.	150	.
chr1	.	wtEM_EN_g6d3n6_DMR	8276151	8276350	1	.	200	.
chr1	.	wtEM_EN_g6d3n6_DMR	8276801	8277100	1	.	300	.
chr1	.	wtEM_EN_g6d3n6_DMR	8290401	8290700	1	.	300	.
chr1	.	wtEM_EN_g6d3n6_DMR	8388701	8389150	1	.	450	.
chr1	.	wtEM_EN_g6d3n6_DMR	8409051	8409300	1	.	250	.
chr1	.	wtEM_EN_g6d3n6_DMR	8437251	8437500	1	.	250	.
chr1	.	wtEM_EN_g6d3n6_DMR	8442351	8442550	1	.	200	.
chr1	.	wtEM_EN_g6d3n6_DMR	8476251	8476350	1	.	100	.
chr1	.	wtEM_EN_g6d3n6_DMR	8477001	8477100	1	.	100	.
chr1	.	wtEM_EN_g6d3n6_DMR	8513351	8513900	1	.	550	.
chr1	.	wtEM_EN_g6d3n6_DMR	8543851	8543950	1	.	100	.
chr1	.	wtEM_EN_g6d3n6_DMR	8561551	8561900	1	.	350	.
chr1	.	wtEM_EN_g6d3n6_DMR	8571151	8571250	1	.	100	.
chr1	.	wtEM_EN_g6d3n6_DMR	8621801	8622200	1	.	400	.
chr1	.	wtEM_EN_g6d3n6_DMR	8623451	8623700	1	.	250	.
chr1	.	wtEM_EN_g6d3n6_DMR	8628151	8628250	1	.	100	.
chr1	.	wtEM_EN_g6d3n6_DMR	8646251	8646350	1	.	100	.
chr1	.	wtEM_EN_g6d3n6_DMR	8648801	8649200	1	.	400	.
chr1	.	wtEM_EN_g6d3n6_DMR	8656101	8656200	1	.	100	.
chr1	.	wtEM_EN_g6d3n6_DMR	8661301	8661400	1	.	100	.
chr1	.	wtEM_EN_g6d3n6_DMR	8690301	8690400	1	.	100	.
chr1	.	wtEM_EN_g6d3n6_DMR	8721501	8721750	1	.	250	.
chr1	.	wtEM_EN_g6d3n6_DMR	8738301	8738650	1	.	350	.
chr1	.	wtEM_EN_g6d3n6_DMR	8740751	8741600	1	.	850	.
chr1	.	wtEM_EN_g6d3n6_DMR	8765951	8766050	1	.	100	.
chr1	.	wtEM_EN_g6d3n6_DMR	8779401	8779650	1	.	250	.
chr1	.	wtEM_EN_g6d3n6_DMR	8780351	8780450	1	.	100	.
chr1	.	wtEM_EN_g6d3n6_DMR	8789351	8790150	1	.	800	.
chr1	.	wtEM_EN_g6d3n6_DMR	8795301	8795400	1	.	100	.
chr1	.	wtEM_EN_g6d3n6_DMR	8802851	8802950	1	.	100	.
chr1	.	wtEM_EN_g6d3n6_DMR	8811851	8812000	1	.	150	.
chr1	.	wtEM_EN_g6d3n6_DMR	8826751	8827050	1	.	300	.
chr1	.	wtEM_EN_g6d3n6_DMR	8830851	8830950	1	.	100	.
chr1	.	wtEM_EN_g6d3n6_DMR	8831601	8831700	1	.	100	.
chr1	.	wtEM_EN_g6d3n6_DMR	8865051	8865250	1	.	200	.
chr1	.	wtEM_EN_g6d3n6_DMR	8899401	8899800	1	.	400	.
chr1	.	wtEM_EN_g6d3n6_DMR	8927601	8927800	1	.	200	.
chr1	.	wtEM_EN_g6d3n6_DMR	9001051	9001200	1	.	150	.
chr1	.	wtEM_EN_g6d3n6_DMR	9018251	9018800	1	.	550	.
chr1	.	wtEM_EN_g6d3n6_DMR	9077651	9079350	1	.	1700	.
chr1	.	wtEM_EN_g6d3n6_DMR	9082701	9082850	1	.	150	.
chr1	.	wtEM_EN_g6d3n6_DMR	9084601	9084800	1	.	200	.
chr1	.	wtEM_EN_g6d3n6_DMR	9088401	9088500	1	.	100	.
chr1	.	wtEM_EN_g6d3n6_DMR	9098151	9098450	1	.	300	.
chr1	.	wtEM_EN_g6d3n6_DMR	9126301	9126500	1	.	200	.
chr1	.	wtEM_EN_g6d3n6_DMR	9137051	9137200	1	.	150	.
chr1	.	wtEM_EN_g6d3n6_DMR	9174251	9174450	1	.	200	.
chr1	.	wtEM_EN_g6d3n6_DMR	9187951	9188500	1	.	550	.
chr1	.	wtEM_EN_g6d3n6_DMR	9195951	9196050	1	.	100	.
chr1	.	wtEM_EN_g6d3n6_DMR	9196801	9197100	1	.	300	.
chr1	.	wtEM_EN_g6d3n6_DMR	9201551	9201650	1	.	100	.
chr1	.	wtEM_EN_g6d3n6_DMR	9204101	9204200	1	.	100	.
chr1	.	wtEM_EN_g6d3n6_DMR	9205101	9205400	1	.	300	.
chr1	.	wtEM_EN_g6d3n6_DMR	9236751	9236850	1	.	100	.
chr1	.	wtEM_EN_g6d3n6_DMR	9248601	9248700	1	.	100	.
chr1	.	wtEM_EN_g6d3n6_DMR	9253951	9254050	1	.	100	.
chr1	.	wtEM_EN_g6d3n6_DMR	9305251	9305700	1	.	450	.
chr1	.	wtEM_EN_g6d3n6_DMR	9322701	9322800	1	.	100	.
chr1	.	wtEM_EN_g6d3n6_DMR	9344251	9344450	1	.	200	.
chr1	.	wtEM_EN_g6d3n6_DMR	9416951	9417150	1	.	200	.
chr1	.	wtEM_EN_g6d3n6_DMR	9506501	9506750	1	.	250	.
chr1	.	wtEM_EN_g6d3n6_DMR	9564951	9565050	1	.	100	.
chr1	.	wtEM_EN_g6d3n6_DMR	9575201	9575300	1	.	100	.
chr1	.	wtEM_EN_g6d3n6_DMR	9586451	9586550	1	.	100	.
chr1	.	wtEM_EN_g6d3n6_DMR	9587001	9587100	1	.	100	.
chr1	.	wtEM_EN_g6d3n6_DMR	9599501	9599750	1	.	250	.
chr1	.	wtEM_EN_g6d3n6_DMR	9602851	9603000	1	.	150	.
chr1	.	wtEM_EN_g6d3n6_DMR	9626351	9626450	1	.	100	.
chr1	.	wtEM_EN_g6d3n6_DMR	9667151	9667250	1	.	100	.
chr1	.	wtEM_EN_g6d3n6_DMR	9690801	9691050	1	.	250	.
chr1	.	wtEM_EN_g6d3n6_DMR	9708451	9708600	1	.	150	.
chr1	.	wtEM_EN_g6d3n6_DMR	9755851	9756250	1	.	400	.
chr1	.	wtEM_EN_g6d3n6_DMR	9758901	9759250	1	.	350	.
chr1	.	wtEM_EN_g6d3n6_DMR	9759701	9760100	1	.	400	.
chr1	.	wtEM_EN_g6d3n6_DMR	9778401	9778550	1	.	150	.
chr1	.	wtEM_EN_g6d3n6_DMR	9842651	9842750	1	.	100	.
chr1	.	wtEM_EN_g6d3n6_DMR	9843201	9843350	1	.	150	.
chr1	.	wtEM_EN_g6d3n6_DMR	9844901	9845000	1	.	100	.
chr1	.	wtEM_EN_g6d3n6_DMR	9850401	9850500	1	.	100	.
chr1	.	wtEM_EN_g6d3n6_DMR	9852801	9852950	1	.	150	.
chr1	.	wtEM_EN_g6d3n6_DMR	9853301	9853550	1	.	250	.
chr1	.	wtEM_EN_g6d3n6_DMR	9855801	9856200	1	.	400	.
chr1	.	wtEM_EN_g6d3n6_DMR	9856901	9857000	1	.	100	.
chr1	.	wtEM_EN_g6d3n6_DMR	9883851	9883950	1	.	100	.
chr1	.	wtEM_EN_g6d3n6_DMR	9909201	9909750	1	.	550	.
chr1	.	wtEM_EN_g6d3n6_DMR	9915451	9915550	1	.	100	.
chr1	.	wtEM_EN_g6d3n6_DMR	9916101	9916500	1	.	400	.
chr1	.	wtEM_EN_g6d3n6_DMR	9919101	9919350	1	.	250	.
chr1	.	wtEM_EN_g6d3n6_DMR	9925301	9926100	1	.	800	.
chr1	.	wtEM_EN_g6d3n6_DMR	9928451	9928650	1	.	200	.
chr1	.	wtEM_EN_g6d3n6_DMR	9939301	9939500	1	.	200	.
chr1	.	wtEM_EN_g6d3n6_DMR	9999401	9999500	1	.	100	.
chr1	.	wtEM_EN_g6d3n6_DMR	10005801	10006000	1	.	200	.
chr1	.	wtEM_EN_g6d3n6_DMR	10006401	10006550	1	.	150	.
chr1	.	wtEM_EN_g6d3n6_DMR	10007451	10007650	1	.	200	.
chr1	.	wtEM_EN_g6d3n6_DMR	10022651	10023200	1	.	550	.
chr1	.	wtEM_EN_g6d3n6_DMR	10048701	10048800	1	.	100	.
chr1	.	wtEM_EN_g6d3n6_DMR	10113851	10113950	1	.	100	.
chr1	.	wtEM_EN_g6d3n6_DMR	10114651	10114850	1	.	200	.
chr1	.	wtEM_EN_g6d3n6_DMR	10118651	10118900	1	.	250	.
chr1	.	wtEM_EN_g6d3n6_DMR	10152951	10153350	1	.	400	.
chr1	.	wtEM_EN_g6d3n6_DMR	10155101	10155750	1	.	650	.
chr1	.	wtEM_EN_g6d3n6_DMR	10156251	10156550	1	.	300	.
chr1	.	wtEM_EN_g6d3n6_DMR	10192601	10192850	1	.	250	.
chr1	.	wtEM_EN_g6d3n6_DMR	10352301	10352700	1	.	400	.
chr1	.	wtEM_EN_g6d3n6_DMR	10383351	10383500	1	.	150	.
chr1	.	wtEM_EN_g6d3n6_DMR	10383901	10384350	1	.	450	.
chr1	.	wtEM_EN_g6d3n6_DMR	10416701	10417000	1	.	300	.
chr1	.	wtEM_EN_g6d3n6_DMR	10421351	10421750	1	.	400	.
chr1	.	wtEM_EN_g6d3n6_DMR	10443301	10443450	1	.	150	.
chr1	.	wtEM_EN_g6d3n6_DMR	10443851	10444050	1	.	200	.
chr1	.	wtEM_EN_g6d3n6_DMR	10507201	10507350	1	.	150	.
chr1	.	wtEM_EN_g6d3n6_DMR	10523551	10523700	1	.	150	.
chr1	.	wtEM_EN_g6d3n6_DMR	10526851	10526950	1	.	100	.
chr1	.	wtEM_EN_g6d3n6_DMR	10527901	10528050	1	.	150	.
chr1	.	wtEM_EN_g6d3n6_DMR	10570151	10570300	1	.	150	.
chr1	.	wtEM_EN_g6d3n6_DMR	10605051	10605150	1	.	100	.
chr1	.	wtEM_EN_g6d3n6_DMR	10624151	10624350	1	.	200	.
chr1	.	wtEM_EN_g6d3n6_DMR	10776501	10777400	1	.	900	.
chr1	.	wtEM_EN_g6d3n6_DMR	10778101	10778800	1	.	700	.
chr1	.	wtEM_EN_g6d3n6_DMR	10785401	10785550	1	.	150	.
chr1	.	wtEM_EN_g6d3n6_DMR	10814251	10814500	1	.	250	.
chr1	.	wtEM_EN_g6d3n6_DMR	10838101	10838200	1	.	100	.
chr1	.	wtEM_EN_g6d3n6_DMR	10856201	10856400	1	.	200	.
chr1	.	wtEM_EN_g6d3n6_DMR	10862151	10862500	1	.	350	.
chr1	.	wtEM_EN_g6d3n6_DMR	10863151	10863250	1	.	100	.
chr1	.	wtEM_EN_g6d3n6_DMR	10867051	10867150	1	.	100	.
chr1	.	wtEM_EN_g6d3n6_DMR	10913601	10913750	1	.	150	.
chr1	.	wtEM_EN_g6d3n6_DMR	10930051	10930300	1	.	250	.
chr1	.	wtEM_EN_g6d3n6_DMR	10932101	10932550	1	.	450	.
chr1	.	wtEM_EN_g6d3n6_DMR	10965901	10966200	1	.	300	.
chr1	.	wtEM_EN_g6d3n6_DMR	10973601	10973700	1	.	100	.
chr1	.	wtEM_EN_g6d3n6_DMR	10982251	10982450	1	.	200	.
chr1	.	wtEM_EN_g6d3n6_DMR	10983001	10983450	1	.	450	.
chr1	.	wtEM_EN_g6d3n6_DMR	11006301	11006500	1	.	200	.
chr1	.	wtEM_EN_g6d3n6_DMR	11020401	11020600	1	.	200	.
chr1	.	wtEM_EN_g6d3n6_DMR	11027501	11028400	1	.	900	.
chr1	.	wtEM_EN_g6d3n6_DMR	11032401	11032500	1	.	100	.
chr1	.	wtEM_EN_g6d3n6_DMR	11044801	11045100	1	.	300	.
chr1	.	wtEM_EN_g6d3n6_DMR	11045701	11045800	1	.	100	.
chr1	.	wtEM_EN_g6d3n6_DMR	11046401	11046600	1	.	200	.
chr1	.	wtEM_EN_g6d3n6_DMR	11047151	11047450	1	.	300	.
chr1	.	wtEM_EN_g6d3n6_DMR	11048351	11048450	1	.	100	.
chr1	.	wtEM_EN_g6d3n6_DMR	11050551	11051400	1	.	850	.
chr1	.	wtEM_EN_g6d3n6_DMR	11089501	11090150	1	.	650	.
chr1	.	wtEM_EN_g6d3n6_DMR	11097001	11097100	1	.	100	.
chr1	.	wtEM_EN_g6d3n6_DMR	11102451	11103050	1	.	600	.
chr1	.	wtEM_EN_g6d3n6_DMR	11106051	11106600	1	.	550	.
chr1	.	wtEM_EN_g6d3n6_DMR	11126001	11126200	1	.	200	.
chr1	.	wtEM_EN_g6d3n6_DMR	11129001	11129350	1	.	350	.
chr1	.	wtEM_EN_g6d3n6_DMR	11131951	11132200	1	.	250	.
chr1	.	wtEM_EN_g6d3n6_DMR	11154351	11154650	1	.	300	.
chr1	.	wtEM_EN_g6d3n6_DMR	11155051	11155500	1	.	450	.
chr1	.	wtEM_EN_g6d3n6_DMR	11155901	11156150	1	.	250	.
chr1	.	wtEM_EN_g6d3n6_DMR	11174601	11174850	1	.	250	.
chr1	.	wtEM_EN_g6d3n6_DMR	11241601	11242150	1	.	550	.
chr1	.	wtEM_EN_g6d3n6_DMR	11259101	11259750	1	.	650	.
chr1	.	wtEM_EN_g6d3n6_DMR	11286851	11287050	1	.	200	.
chr1	.	wtEM_EN_g6d3n6_DMR	11301001	11301600	1	.	600	.
chr1	.	wtEM_EN_g6d3n6_DMR	11302251	11302350	1	.	100	.
chr1	.	wtEM_EN_g6d3n6_DMR	11366101	11367100	1	.	1000	.
chr1	.	wtEM_EN_g6d3n6_DMR	11369451	11369800	1	.	350	.
chr1	.	wtEM_EN_g6d3n6_DMR	11378151	11378300	1	.	150	.
chr1	.	wtEM_EN_g6d3n6_DMR	11413001	11413400	1	.	400	.
chr1	.	wtEM_EN_g6d3n6_DMR	11427801	11428000	1	.	200	.
chr1	.	wtEM_EN_g6d3n6_DMR	11440901	11441050	1	.	150	.
chr1	.	wtEM_EN_g6d3n6_DMR	11460051	11460350	1	.	300	.
chr1	.	wtEM_EN_g6d3n6_DMR	11466201	11466700	1	.	500	.
chr1	.	wtEM_EN_g6d3n6_DMR	11467201	11467300	1	.	100	.
chr1	.	wtEM_EN_g6d3n6_DMR	11517851	11517950	1	.	100	.
chr1	.	wtEM_EN_g6d3n6_DMR	11527201	11527400	1	.	200	.
chr1	.	wtEM_EN_g6d3n6_DMR	11552151	11552300	1	.	150	.
chr1	.	wtEM_EN_g6d3n6_DMR	11566601	11566700	1	.	100	.
chr1	.	wtEM_EN_g6d3n6_DMR	11586051	11586300	1	.	250	.
chr1	.	wtEM_EN_g6d3n6_DMR	11611501	11611600	1	.	100	.
chr1	.	wtEM_EN_g6d3n6_DMR	11636301	11636500	1	.	200	.
chr1	.	wtEM_EN_g6d3n6_DMR	11637151	11637650	1	.	500	.
chr1	.	wtEM_EN_g6d3n6_DMR	11644501	11644600	1	.	100	.
chr1	.	wtEM_EN_g6d3n6_DMR	11648251	11648550	1	.	300	.
chr1	.	wtEM_EN_g6d3n6_DMR	11661201	11661750	1	.	550	.
chr1	.	wtEM_EN_g6d3n6_DMR	11662151	11662250	1	.	100	.
chr1	.	wtEM_EN_g6d3n6_DMR	11666301	11666400	1	.	100	.
chr1	.	wtEM_EN_g6d3n6_DMR	11666951	11667050	1	.	100	.
chr1	.	wtEM_EN_g6d3n6_DMR	11686301	11686550	1	.	250	.
chr1	.	wtEM_EN_g6d3n6_DMR	11692351	11692500	1	.	150	.
chr1	.	wtEM_EN_g6d3n6_DMR	11692901	11693450	1	.	550	.
chr1	.	wtEM_EN_g6d3n6_DMR	11732701	11733200	1	.	500	.
chr1	.	wtEM_EN_g6d3n6_DMR	11733651	11734800	1	.	1150	.
chr1	.	wtEM_EN_g6d3n6_DMR	11744801	11744950	1	.	150	.
chr1	.	wtEM_EN_g6d3n6_DMR	11752301	11753150	1	.	850	.
chr1	.	wtEM_EN_g6d3n6_DMR	11779501	11779600	1	.	100	.
chr1	.	wtEM_EN_g6d3n6_DMR	11783251	11783500	1	.	250	.
chr1	.	wtEM_EN_g6d3n6_DMR	11789401	11789600	1	.	200	.
chr1	.	wtEM_EN_g6d3n6_DMR	11796301	11796400	1	.	100	.
chr1	.	wtEM_EN_g6d3n6_DMR	11806201	11806700	1	.	500	.
chr1	.	wtEM_EN_g6d3n6_DMR	11807601	11807850	1	.	250	.
chr1	.	wtEM_EN_g6d3n6_DMR	11812801	11813000	1	.	200	.
chr1	.	wtEM_EN_g6d3n6_DMR	11816951	11817250	1	.	300	.
chr1	.	wtEM_EN_g6d3n6_DMR	11818201	11818400	1	.	200	.
chr1	.	wtEM_EN_g6d3n6_DMR	11822251	11822500	1	.	250	.
chr1	.	wtEM_EN_g6d3n6_DMR	11826301	11826400	1	.	100	.
chr1	.	wtEM_EN_g6d3n6_DMR	11832101	11832450	1	.	350	.
chr1	.	wtEM_EN_g6d3n6_DMR	11839101	11839750	1	.	650	.
chr1	.	wtEM_EN_g6d3n6_DMR	11857301	11857650	1	.	350	.
chr1	.	wtEM_EN_g6d3n6_DMR	11861351	11861450	1	.	100	.
chr1	.	wtEM_EN_g6d3n6_DMR	11880701	11880800	1	.	100	.
chr1	.	wtEM_EN_g6d3n6_DMR	11893101	11893350	1	.	250	.
chr1	.	wtEM_EN_g6d3n6_DMR	11893751	11894350	1	.	600	.
chr1	.	wtEM_EN_g6d3n6_DMR	11895051	11895250	1	.	200	.
chr1	.	wtEM_EN_g6d3n6_DMR	11910951	11911100	1	.	150	.
chr1	.	wtEM_EN_g6d3n6_DMR	11935301	11935900	1	.	600	.
chr1	.	wtEM_EN_g6d3n6_DMR	11958601	11959300	1	.	700	.
chr1	.	wtEM_EN_g6d3n6_DMR	11998601	11998750	1	.	150	.
chr1	.	wtEM_EN_g6d3n6_DMR	12009201	12009800	1	.	600	.
chr1	.	wtEM_EN_g6d3n6_DMR	12012851	12013000	1	.	150	.
chr1	.	wtEM_EN_g6d3n6_DMR	12013351	12013450	1	.	100	.
chr1	.	wtEM_EN_g6d3n6_DMR	12014251	12014950	1	.	700	.
chr1	.	wtEM_EN_g6d3n6_DMR	12019651	12020150	1	.	500	.
chr1	.	wtEM_EN_g6d3n6_DMR	12021751	12022350	1	.	600	.
chr1	.	wtEM_EN_g6d3n6_DMR	12032001	12032900	1	.	900	.
chr1	.	wtEM_EN_g6d3n6_DMR	12034151	12035700	1	.	1550	.
chr1	.	wtEM_EN_g6d3n6_DMR	12037751	12038650	1	.	900	.
chr1	.	wtEM_EN_g6d3n6_DMR	12039151	12039250	1	.	100	.
chr1	.	wtEM_EN_g6d3n6_DMR	12040051	12040400	1	.	350	.
chr1	.	wtEM_EN_g6d3n6_DMR	12041051	12041600	1	.	550	.
chr1	.	wtEM_EN_g6d3n6_DMR	12041951	12042350	1	.	400	.
chr1	.	wtEM_EN_g6d3n6_DMR	12062251	12062600	1	.	350	.
chr1	.	wtEM_EN_g6d3n6_DMR	12063001	12063350	1	.	350	.
chr1	.	wtEM_EN_g6d3n6_DMR	12070701	12071600	1	.	900	.
chr1	.	wtEM_EN_g6d3n6_DMR	12078501	12078600	1	.	100	.
chr1	.	wtEM_EN_g6d3n6_DMR	12083901	12084500	1	.	600	.
chr1	.	wtEM_EN_g6d3n6_DMR	12097101	12097250	1	.	150	.
chr1	.	wtEM_EN_g6d3n6_DMR	12113101	12113350	1	.	250	.
chr1	.	wtEM_EN_g6d3n6_DMR	12131251	12131550	1	.	300	.
chr1	.	wtEM_EN_g6d3n6_DMR	12133101	12133400	1	.	300	.
chr1	.	wtEM_EN_g6d3n6_DMR	12137301	12137400	1	.	100	.
chr1	.	wtEM_EN_g6d3n6_DMR	12166701	12167050	1	.	350	.
chr1	.	wtEM_EN_g6d3n6_DMR	12172501	12172700	1	.	200	.
chr1	.	wtEM_EN_g6d3n6_DMR	12183501	12183850	1	.	350	.
chr1	.	wtEM_EN_g6d3n6_DMR	12184651	12185250	1	.	600	.
chr1	.	wtEM_EN_g6d3n6_DMR	12186901	12187300	1	.	400	.
chr1	.	wtEM_EN_g6d3n6_DMR	12219851	12220200	1	.	350	.
chr1	.	wtEM_EN_g6d3n6_DMR	12230951	12231100	1	.	150	.
chr1	.	wtEM_EN_g6d3n6_DMR	12240701	12240900	1	.	200	.
chr1	.	wtEM_EN_g6d3n6_DMR	12247601	12247750	1	.	150	.
chr1	.	wtEM_EN_g6d3n6_DMR	12287151	12287450	1	.	300	.
chr1	.	wtEM_EN_g6d3n6_DMR	12298001	12298450	1	.	450	.
chr1	.	wtEM_EN_g6d3n6_DMR	12299101	12299550	1	.	450	.
chr1	.	wtEM_EN_g6d3n6_DMR	12299951	12300400	1	.	450	.
chr1	.	wtEM_EN_g6d3n6_DMR	12310501	12310850	1	.	350	.
chr1	.	wtEM_EN_g6d3n6_DMR	12315351	12315450	1	.	100	.
chr1	.	wtEM_EN_g6d3n6_DMR	12316451	12316950	1	.	500	.
chr1	.	wtEM_EN_g6d3n6_DMR	12318101	12318350	1	.	250	.
chr1	.	wtEM_EN_g6d3n6_DMR	12328651	12328800	1	.	150	.
chr1	.	wtEM_EN_g6d3n6_DMR	12336851	12337000	1	.	150	.
chr1	.	wtEM_EN_g6d3n6_DMR	12337601	12337700	1	.	100	.
chr1	.	wtEM_EN_g6d3n6_DMR	12341801	12342100	1	.	300	.
chr1	.	wtEM_EN_g6d3n6_DMR	12373901	12374000	1	.	100	.
chr1	.	wtEM_EN_g6d3n6_DMR	12376451	12376850	1	.	400	.
chr1	.	wtEM_EN_g6d3n6_DMR	12379201	12379300	1	.	100	.
chr1	.	wtEM_EN_g6d3n6_DMR	12380601	12380800	1	.	200	.
chr1	.	wtEM_EN_g6d3n6_DMR	12387901	12388050	1	.	150	.
chr1	.	wtEM_EN_g6d3n6_DMR	12391501	12391600	1	.	100	.
chr1	.	wtEM_EN_g6d3n6_DMR	12440201	12440650	1	.	450	.
chr1	.	wtEM_EN_g6d3n6_DMR	12444151	12444250	1	.	100	.
chr1	.	wtEM_EN_g6d3n6_DMR	12444751	12446550	1	.	1800	.
chr1	.	wtEM_EN_g6d3n6_DMR	12457901	12458000	1	.	100	.
chr1	.	wtEM_EN_g6d3n6_DMR	12466301	12466700	1	.	400	.
chr1	.	wtEM_EN_g6d3n6_DMR	12467051	12467650	1	.	600	.
chr1	.	wtEM_EN_g6d3n6_DMR	12468751	12469150	1	.	400	.
chr1	.	wtEM_EN_g6d3n6_DMR	12470701	12471250	1	.	550	.
chr1	.	wtEM_EN_g6d3n6_DMR	12476901	12477250	1	.	350	.
chr1	.	wtEM_EN_g6d3n6_DMR	12480551	12480650	1	.	100	.
chr1	.	wtEM_EN_g6d3n6_DMR	12483101	12483550	1	.	450	.
chr1	.	wtEM_EN_g6d3n6_DMR	12497401	12497500	1	.	100	.
chr1	.	wtEM_EN_g6d3n6_DMR	12498201	12499100	1	.	900	.
chr1	.	wtEM_EN_g6d3n6_DMR	12499951	12500150	1	.	200	.
chr1	.	wtEM_EN_g6d3n6_DMR	12504251	12504350	1	.	100	.
chr1	.	wtEM_EN_g6d3n6_DMR	12508451	12511600	1	.	3150	.
chr1	.	wtEM_EN_g6d3n6_DMR	12513201	12513300	1	.	100	.
chr1	.	wtEM_EN_g6d3n6_DMR	12519651	12519800	1	.	150	.
chr1	.	wtEM_EN_g6d3n6_DMR	12526301	12526800	1	.	500	.
chr1	.	wtEM_EN_g6d3n6_DMR	12527151	12527350	1	.	200	.
chr1	.	wtEM_EN_g6d3n6_DMR	12548201	12548400	1	.	200	.
chr1	.	wtEM_EN_g6d3n6_DMR	12555151	12559150	1	.	4000	.
chr1	.	wtEM_EN_g6d3n6_DMR	12559651	12559750	1	.	100	.
chr1	.	wtEM_EN_g6d3n6_DMR	12561751	12561950	1	.	200	.
chr1	.	wtEM_EN_g6d3n6_DMR	12577601	12580650	1	.	3050	.
chr1	.	wtEM_EN_g6d3n6_DMR	12592001	12592300	1	.	300	.
chr1	.	wtEM_EN_g6d3n6_DMR	12592801	12593400	1	.	600	.
chr1	.	wtEM_EN_g6d3n6_DMR	12593751	12593900	1	.	150	.
chr1	.	wtEM_EN_g6d3n6_DMR	12602201	12602450	1	.	250	.
chr1	.	wtEM_EN_g6d3n6_DMR	12610801	12611050	1	.	250	.
chr1	.	wtEM_EN_g6d3n6_DMR	12614301	12614800	1	.	500	.
chr1	.	wtEM_EN_g6d3n6_DMR	12615251	12615450	1	.	200	.
chr1	.	wtEM_EN_g6d3n6_DMR	12626501	12626650	1	.	150	.
chr1	.	wtEM_EN_g6d3n6_DMR	12630951	12631200	1	.	250	.
chr1	.	wtEM_EN_g6d3n6_DMR	12631601	12632650	1	.	1050	.
chr1	.	wtEM_EN_g6d3n6_DMR	12633151	12633300	1	.	150	.
chr1	.	wtEM_EN_g6d3n6_DMR	12636601	12636700	1	.	100	.
chr1	.	wtEM_EN_g6d3n6_DMR	12640701	12640850	1	.	150	.
chr1	.	wtEM_EN_g6d3n6_DMR	12641251	12641450	1	.	200	.
chr1	.	wtEM_EN_g6d3n6_DMR	12643301	12644000	1	.	700	.
chr1	.	wtEM_EN_g6d3n6_DMR	12647001	12647250	1	.	250	.
chr1	.	wtEM_EN_g6d3n6_DMR	12684101	12684850	1	.	750	.
chr1	.	wtEM_EN_g6d3n6_DMR	12691551	12691650	1	.	100	.
chr1	.	wtEM_EN_g6d3n6_DMR	12692201	12692450	1	.	250	.
chr1	.	wtEM_EN_g6d3n6_DMR	12695301	12695400	1	.	100	.
chr1	.	wtEM_EN_g6d3n6_DMR	12698751	12698900	1	.	150	.
chr1	.	wtEM_EN_g6d3n6_DMR	12699401	12700400	1	.	1000	.
chr1	.	wtEM_EN_g6d3n6_DMR	12701701	12701850	1	.	150	.
chr1	.	wtEM_EN_g6d3n6_DMR	12702351	12702600	1	.	250	.
chr1	.	wtEM_EN_g6d3n6_DMR	12703801	12703900	1	.	100	.
chr1	.	wtEM_EN_g6d3n6_DMR	12731301	12731550	1	.	250	.
chr1	.	wtEM_EN_g6d3n6_DMR	12733951	12735050	1	.	1100	.
chr1	.	wtEM_EN_g6d3n6_DMR	12738301	12739100	1	.	800	.
chr1	.	wtEM_EN_g6d3n6_DMR	12739751	12739900	1	.	150	.
chr1	.	wtEM_EN_g6d3n6_DMR	12741701	12741950	1	.	250	.
chr1	.	wtEM_EN_g6d3n6_DMR	12765201	12765450	1	.	250	.
chr1	.	wtEM_EN_g6d3n6_DMR	12766351	12766500	1	.	150	.
chr1	.	wtEM_EN_g6d3n6_DMR	12766851	12767000	1	.	150	.
chr1	.	wtEM_EN_g6d3n6_DMR	12771951	12772150	1	.	200	.
chr1	.	wtEM_EN_g6d3n6_DMR	12785601	12785700	1	.	100	.
chr1	.	wtEM_EN_g6d3n6_DMR	12790201	12790300	1	.	100	.
chr1	.	wtEM_EN_g6d3n6_DMR	12803901	12804400	1	.	500	.
chr1	.	wtEM_EN_g6d3n6_DMR	12807251	12808050	1	.	800	.
chr1	.	wtEM_EN_g6d3n6_DMR	12823101	12824250	1	.	1150	.
chr1	.	wtEM_EN_g6d3n6_DMR	12861901	12862050	1	.	150	.
chr1	.	wtEM_EN_g6d3n6_DMR	12869101	12869500	1	.	400	.
chr1	.	wtEM_EN_g6d3n6_DMR	12870101	12870450	1	.	350	.
chr1	.	wtEM_EN_g6d3n6_DMR	12883101	12883200	1	.	100	.
chr1	.	wtEM_EN_g6d3n6_DMR	12887251	12887500	1	.	250	.
chr1	.	wtEM_EN_g6d3n6_DMR	12894901	12895550	1	.	650	.
chr1	.	wtEM_EN_g6d3n6_DMR	12898601	12898800	1	.	200	.
chr1	.	wtEM_EN_g6d3n6_DMR	12899451	12900450	1	.	1000	.
chr1	.	wtEM_EN_g6d3n6_DMR	12900901	12901050	1	.	150	.
chr1	.	wtEM_EN_g6d3n6_DMR	12901401	12901600	1	.	200	.
chr1	.	wtEM_EN_g6d3n6_DMR	12902201	12902350	1	.	150	.
chr1	.	wtEM_EN_g6d3n6_DMR	12906101	12906500	1	.	400	.
chr1	.	wtEM_EN_g6d3n6_DMR	12915951	12916050	1	.	100	.
chr1	.	wtEM_EN_g6d3n6_DMR	12918901	12919000	1	.	100	.
chr1	.	wtEM_EN_g6d3n6_DMR	12922001	12922250	1	.	250	.
chr1	.	wtEM_EN_g6d3n6_DMR	12922951	12924250	1	.	1300	.
chr1	.	wtEM_EN_g6d3n6_DMR	12925951	12927150	1	.	1200	.
chr1	.	wtEM_EN_g6d3n6_DMR	12927951	12928900	1	.	950	.
chr1	.	wtEM_EN_g6d3n6_DMR	12929251	12930600	1	.	1350	.
chr1	.	wtEM_EN_g6d3n6_DMR	12931151	12931350	1	.	200	.
chr1	.	wtEM_EN_g6d3n6_DMR	12931851	12932150	1	.	300	.
chr1	.	wtEM_EN_g6d3n6_DMR	12932501	12932650	1	.	150	.
chr1	.	wtEM_EN_g6d3n6_DMR	12942051	12942800	1	.	750	.
chr1	.	wtEM_EN_g6d3n6_DMR	12954001	12954100	1	.	100	.
chr1	.	wtEM_EN_g6d3n6_DMR	12963551	12964050	1	.	500	.
chr1	.	wtEM_EN_g6d3n6_DMR	12966551	12966800	1	.	250	.
chr1	.	wtEM_EN_g6d3n6_DMR	12968551	12968800	1	.	250	.
chr1	.	wtEM_EN_g6d3n6_DMR	12976851	12977350	1	.	500	.
chr1	.	wtEM_EN_g6d3n6_DMR	12980201	12980450	1	.	250	.
chr1	.	wtEM_EN_g6d3n6_DMR	12983051	12983250	1	.	200	.
chr1	.	wtEM_EN_g6d3n6_DMR	12985301	12985600	1	.	300	.
chr1	.	wtEM_EN_g6d3n6_DMR	12997301	12997700	1	.	400	.
chr1	.	wtEM_EN_g6d3n6_DMR	13001601	13001750	1	.	150	.
chr1	.	wtEM_EN_g6d3n6_DMR	13007301	13007450	1	.	150	.
chr1	.	wtEM_EN_g6d3n6_DMR	13012851	13012950	1	.	100	.
chr1	.	wtEM_EN_g6d3n6_DMR	13015551	13015700	1	.	150	.
chr1	.	wtEM_EN_g6d3n6_DMR	13024101	13024250	1	.	150	.
chr1	.	wtEM_EN_g6d3n6_DMR	13027751	13028800	1	.	1050	.
chr1	.	wtEM_EN_g6d3n6_DMR	13033801	13033900	1	.	100	.
chr1	.	wtEM_EN_g6d3n6_DMR	13036901	13037050	1	.	150	.
chr1	.	wtEM_EN_g6d3n6_DMR	13043151	13043900	1	.	750	.
chr1	.	wtEM_EN_g6d3n6_DMR	13049751	13049950	1	.	200	.
chr1	.	wtEM_EN_g6d3n6_DMR	13055401	13056050	1	.	650	.
chr1	.	wtEM_EN_g6d3n6_DMR	13057301	13057400	1	.	100	.
chr1	.	wtEM_EN_g6d3n6_DMR	13067851	13068650	1	.	800	.
chr1	.	wtEM_EN_g6d3n6_DMR	13069051	13069350	1	.	300	.
chr1	.	wtEM_EN_g6d3n6_DMR	13070751	13070850	1	.	100	.
chr1	.	wtEM_EN_g6d3n6_DMR	13080951	13081350	1	.	400	.
chr1	.	wtEM_EN_g6d3n6_DMR	13081851	13082150	1	.	300	.
chr1	.	wtEM_EN_g6d3n6_DMR	13082601	13084700	1	.	2100	.
chr1	.	wtEM_EN_g6d3n6_DMR	13085251	13085900	1	.	650	.
chr1	.	wtEM_EN_g6d3n6_DMR	13086351	13087350	1	.	1000	.
chr1	.	wtEM_EN_g6d3n6_DMR	13087701	13087950	1	.	250	.
chr1	.	wtEM_EN_g6d3n6_DMR	13089301	13089400	1	.	100	.
chr1	.	wtEM_EN_g6d3n6_DMR	13097751	13098100	1	.	350	.
chr1	.	wtEM_EN_g6d3n6_DMR	13099151	13099250	1	.	100	.
chr1	.	wtEM_EN_g6d3n6_DMR	13102951	13103050	1	.	100	.
chr1	.	wtEM_EN_g6d3n6_DMR	13104201	13104550	1	.	350	.
chr1	.	wtEM_EN_g6d3n6_DMR	13106301	13106800	1	.	500	.
chr1	.	wtEM_EN_g6d3n6_DMR	13107351	13108050	1	.	700	.
chr1	.	wtEM_EN_g6d3n6_DMR	13108501	13111550	1	.	3050	.
chr1	.	wtEM_EN_g6d3n6_DMR	13114601	13114900	1	.	300	.
chr1	.	wtEM_EN_g6d3n6_DMR	13121651	13121750	1	.	100	.
chr1	.	wtEM_EN_g6d3n6_DMR	13126851	13128000	1	.	1150	.
chr1	.	wtEM_EN_g6d3n6_DMR	13128451	13128550	1	.	100	.
chr1	.	wtEM_EN_g6d3n6_DMR	13129951	13130150	1	.	200	.
chr1	.	wtEM_EN_g6d3n6_DMR	13148401	13148850	1	.	450	.
chr1	.	wtEM_EN_g6d3n6_DMR	13151251	13151450	1	.	200	.
chr1	.	wtEM_EN_g6d3n6_DMR	13152151	13152550	1	.	400	.
chr1	.	wtEM_EN_g6d3n6_DMR	13155801	13155900	1	.	100	.
chr1	.	wtEM_EN_g6d3n6_DMR	13161701	13161950	1	.	250	.
chr1	.	wtEM_EN_g6d3n6_DMR	13164951	13165100	1	.	150	.
chr1	.	wtEM_EN_g6d3n6_DMR	13166501	13166900	1	.	400	.
chr1	.	wtEM_EN_g6d3n6_DMR	13171101	13171350	1	.	250	.
chr1	.	wtEM_EN_g6d3n6_DMR	13172951	13173050	1	.	100	.
chr1	.	wtEM_EN_g6d3n6_DMR	13181251	13181350	1	.	100	.
chr1	.	wtEM_EN_g6d3n6_DMR	13185651	13186250	1	.	600	.
chr1	.	wtEM_EN_g6d3n6_DMR	13199001	13200050	1	.	1050	.
chr1	.	wtEM_EN_g6d3n6_DMR	13205651	13206000	1	.	350	.
chr1	.	wtEM_EN_g6d3n6_DMR	13208901	13209000	1	.	100	.
chr1	.	wtEM_EN_g6d3n6_DMR	13213651	13214200	1	.	550	.
chr1	.	wtEM_EN_g6d3n6_DMR	13216601	13216700	1	.	100	.
chr1	.	wtEM_EN_g6d3n6_DMR	13234751	13235750	1	.	1000	.
chr1	.	wtEM_EN_g6d3n6_DMR	13236601	13237150	1	.	550	.
chr1	.	wtEM_EN_g6d3n6_DMR	13238901	13239250	1	.	350	.
chr1	.	wtEM_EN_g6d3n6_DMR	13239601	13240200	1	.	600	.
chr1	.	wtEM_EN_g6d3n6_DMR	13243701	13243800	1	.	100	.
chr1	.	wtEM_EN_g6d3n6_DMR	13244151	13244450	1	.	300	.
chr1	.	wtEM_EN_g6d3n6_DMR	13245101	13246300	1	.	1200	.
chr1	.	wtEM_EN_g6d3n6_DMR	13247251	13247400	1	.	150	.
chr1	.	wtEM_EN_g6d3n6_DMR	13248151	13248900	1	.	750	.
chr1	.	wtEM_EN_g6d3n6_DMR	13249351	13249650	1	.	300	.
chr1	.	wtEM_EN_g6d3n6_DMR	13258151	13258450	1	.	300	.
chr1	.	wtEM_EN_g6d3n6_DMR	13260851	13260950	1	.	100	.
chr1	.	wtEM_EN_g6d3n6_DMR	13264801	13265450	1	.	650	.
chr1	.	wtEM_EN_g6d3n6_DMR	13282751	13283700	1	.	950	.
chr1	.	wtEM_EN_g6d3n6_DMR	13285451	13286000	1	.	550	.
chr1	.	wtEM_EN_g6d3n6_DMR	13286351	13287200	1	.	850	.
chr1	.	wtEM_EN_g6d3n6_DMR	13288351	13290200	1	.	1850	.
chr1	.	wtEM_EN_g6d3n6_DMR	13291951	13292150	1	.	200	.
chr1	.	wtEM_EN_g6d3n6_DMR	13292651	13292900	1	.	250	.
chr1	.	wtEM_EN_g6d3n6_DMR	13293251	13293700	1	.	450	.
chr1	.	wtEM_EN_g6d3n6_DMR	13302501	13304600	1	.	2100	.
chr1	.	wtEM_EN_g6d3n6_DMR	13306251	13306600	1	.	350	.
chr1	.	wtEM_EN_g6d3n6_DMR	13307101	13307250	1	.	150	.
chr1	.	wtEM_EN_g6d3n6_DMR	13311501	13312650	1	.	1150	.
chr1	.	wtEM_EN_g6d3n6_DMR	13313551	13313700	1	.	150	.
chr1	.	wtEM_EN_g6d3n6_DMR	13328901	13329050	1	.	150	.
chr1	.	wtEM_EN_g6d3n6_DMR	13343751	13344050	1	.	300	.
chr1	.	wtEM_EN_g6d3n6_DMR	13346851	13346950	1	.	100	.
chr1	.	wtEM_EN_g6d3n6_DMR	13348951	13349200	1	.	250	.
chr1	.	wtEM_EN_g6d3n6_DMR	13353151	13353500	1	.	350	.
chr1	.	wtEM_EN_g6d3n6_DMR	13354801	13354950	1	.	150	.
chr1	.	wtEM_EN_g6d3n6_DMR	13356251	13357050	1	.	800	.
chr1	.	wtEM_EN_g6d3n6_DMR	13372801	13373800	1	.	1000	.
chr1	.	wtEM_EN_g6d3n6_DMR	13376851	13376950	1	.	100	.
chr1	.	wtEM_EN_g6d3n6_DMR	13386851	13387150	1	.	300	.
chr1	.	wtEM_EN_g6d3n6_DMR	13387651	13388400	1	.	750	.
chr1	.	wtEM_EN_g6d3n6_DMR	13388901	13389000	1	.	100	.
chr1	.	wtEM_EN_g6d3n6_DMR	13389501	13390600	1	.	1100	.
chr1	.	wtEM_EN_g6d3n6_DMR	13391301	13391950	1	.	650	.
chr1	.	wtEM_EN_g6d3n6_DMR	13392551	13392850	1	.	300	.
chr1	.	wtEM_EN_g6d3n6_DMR	13393501	13393650	1	.	150	.
chr1	.	wtEM_EN_g6d3n6_DMR	13398051	13398600	1	.	550	.
chr1	.	wtEM_EN_g6d3n6_DMR	13418951	13419550	1	.	600	.
chr1	.	wtEM_EN_g6d3n6_DMR	13422451	13423400	1	.	950	.
chr1	.	wtEM_EN_g6d3n6_DMR	13423751	13424150	1	.	400	.
chr1	.	wtEM_EN_g6d3n6_DMR	13425551	13425800	1	.	250	.
chr1	.	wtEM_EN_g6d3n6_DMR	13426301	13427700	1	.	1400	.
chr1	.	wtEM_EN_g6d3n6_DMR	13431201	13432250	1	.	1050	.
chr1	.	wtEM_EN_g6d3n6_DMR	13432801	13433050	1	.	250	.
chr1	.	wtEM_EN_g6d3n6_DMR	13436351	13437550	1	.	1200	.
chr1	.	wtEM_EN_g6d3n6_DMR	13443701	13443900	1	.	200	.
chr1	.	wtEM_EN_g6d3n6_DMR	13454901	13455200	1	.	300	.
chr1	.	wtEM_EN_g6d3n6_DMR	13462651	13463600	1	.	950	.
chr1	.	wtEM_EN_g6d3n6_DMR	13464501	13464900	1	.	400	.
chr1	.	wtEM_EN_g6d3n6_DMR	13467301	13467400	1	.	100	.
chr1	.	wtEM_EN_g6d3n6_DMR	13474651	13475150	1	.	500	.
chr1	.	wtEM_EN_g6d3n6_DMR	13477601	13477750	1	.	150	.
chr1	.	wtEM_EN_g6d3n6_DMR	13481901	13482600	1	.	700	.
chr1	.	wtEM_EN_g6d3n6_DMR	13483501	13483750	1	.	250	.
chr1	.	wtEM_EN_g6d3n6_DMR	13497301	13497650	1	.	350	.
chr1	.	wtEM_EN_g6d3n6_DMR	13521951	13522800	1	.	850	.
chr1	.	wtEM_EN_g6d3n6_DMR	13523351	13523500	1	.	150	.
chr1	.	wtEM_EN_g6d3n6_DMR	13523851	13524550	1	.	700	.
chr1	.	wtEM_EN_g6d3n6_DMR	13525551	13526750	1	.	1200	.
chr1	.	wtEM_EN_g6d3n6_DMR	13527451	13528950	1	.	1500	.
chr1	.	wtEM_EN_g6d3n6_DMR	13533801	13534200	1	.	400	.
chr1	.	wtEM_EN_g6d3n6_DMR	13546101	13546400	1	.	300	.
chr1	.	wtEM_EN_g6d3n6_DMR	13549901	13550100	1	.	200	.
chr1	.	wtEM_EN_g6d3n6_DMR	13555601	13555750	1	.	150	.
chr1	.	wtEM_EN_g6d3n6_DMR	13560901	13561250	1	.	350	.
chr1	.	wtEM_EN_g6d3n6_DMR	13571651	13571850	1	.	200	.
chr1	.	wtEM_EN_g6d3n6_DMR	13573301	13573500	1	.	200	.
chr1	.	wtEM_EN_g6d3n6_DMR	13584751	13585600	1	.	850	.
chr1	.	wtEM_EN_g6d3n6_DMR	13586101	13586650	1	.	550	.
chr1	.	wtEM_EN_g6d3n6_DMR	13587001	13587150	1	.	150	.
chr1	.	wtEM_EN_g6d3n6_DMR	13588251	13588700	1	.	450	.
chr1	.	wtEM_EN_g6d3n6_DMR	13592351	13592450	1	.	100	.
chr1	.	wtEM_EN_g6d3n6_DMR	13605301	13605900	1	.	600	.
chr1	.	wtEM_EN_g6d3n6_DMR	13618051	13618200	1	.	150	.
chr1	.	wtEM_EN_g6d3n6_DMR	13637951	13639400	1	.	1450	.
chr1	.	wtEM_EN_g6d3n6_DMR	13644751	13645750	1	.	1000	.
chr1	.	wtEM_EN_g6d3n6_DMR	13650401	13650600	1	.	200	.
chr1	.	wtEM_EN_g6d3n6_DMR	13652701	13652850	1	.	150	.
chr1	.	wtEM_EN_g6d3n6_DMR	13669301	13669400	1	.	100	.
chr1	.	wtEM_EN_g6d3n6_DMR	13672401	13672700	1	.	300	.
chr1	.	wtEM_EN_g6d3n6_DMR	13675001	13675150	1	.	150	.
chr1	.	wtEM_EN_g6d3n6_DMR	13688001	13688150	1	.	150	.
chr1	.	wtEM_EN_g6d3n6_DMR	13688751	13688900	1	.	150	.
chr1	.	wtEM_EN_g6d3n6_DMR	13705301	13705500	1	.	200	.
chr1	.	wtEM_EN_g6d3n6_DMR	13716701	13717750	1	.	1050	.
chr1	.	wtEM_EN_g6d3n6_DMR	13718551	13719100	1	.	550	.
chr1	.	wtEM_EN_g6d3n6_DMR	13720851	13721100	1	.	250	.
chr1	.	wtEM_EN_g6d3n6_DMR	13729801	13729900	1	.	100	.
chr1	.	wtEM_EN_g6d3n6_DMR	13733251	13733450	1	.	200	.
chr1	.	wtEM_EN_g6d3n6_DMR	13734201	13734300	1	.	100	.
chr1	.	wtEM_EN_g6d3n6_DMR	13746351	13746600	1	.	250	.
chr1	.	wtEM_EN_g6d3n6_DMR	13747901	13748250	1	.	350	.
chr1	.	wtEM_EN_g6d3n6_DMR	13749051	13749300	1	.	250	.
chr1	.	wtEM_EN_g6d3n6_DMR	13750001	13750350	1	.	350	.
chr1	.	wtEM_EN_g6d3n6_DMR	13751951	13752600	1	.	650	.
chr1	.	wtEM_EN_g6d3n6_DMR	13755351	13757700	1	.	2350	.
chr1	.	wtEM_EN_g6d3n6_DMR	13758101	13758800	1	.	700	.
chr1	.	wtEM_EN_g6d3n6_DMR	13760551	13761350	1	.	800	.
chr1	.	wtEM_EN_g6d3n6_DMR	13762251	13762500	1	.	250	.
chr1	.	wtEM_EN_g6d3n6_DMR	13763151	13763950	1	.	800	.
chr1	.	wtEM_EN_g6d3n6_DMR	13796601	13796900	1	.	300	.
chr1	.	wtEM_EN_g6d3n6_DMR	13797451	13797550	1	.	100	.
chr1	.	wtEM_EN_g6d3n6_DMR	13809651	13810050	1	.	400	.
chr1	.	wtEM_EN_g6d3n6_DMR	13832901	13833000	1	.	100	.
chr1	.	wtEM_EN_g6d3n6_DMR	13837051	13837200	1	.	150	.
chr1	.	wtEM_EN_g6d3n6_DMR	13845651	13845750	1	.	100	.
chr1	.	wtEM_EN_g6d3n6_DMR	13849451	13849550	1	.	100	.
chr1	.	wtEM_EN_g6d3n6_DMR	13853201	13853750	1	.	550	.
chr1	.	wtEM_EN_g6d3n6_DMR	13855451	13855750	1	.	300	.
chr1	.	wtEM_EN_g6d3n6_DMR	13856201	13856850	1	.	650	.
chr1	.	wtEM_EN_g6d3n6_DMR	13857601	13858150	1	.	550	.
chr1	.	wtEM_EN_g6d3n6_DMR	13859351	13859550	1	.	200	.
chr1	.	wtEM_EN_g6d3n6_DMR	13860501	13860950	1	.	450	.
chr1	.	wtEM_EN_g6d3n6_DMR	13863601	13864000	1	.	400	.
chr1	.	wtEM_EN_g6d3n6_DMR	13867851	13868050	1	.	200	.
chr1	.	wtEM_EN_g6d3n6_DMR	13869501	13869700	1	.	200	.
chr1	.	wtEM_EN_g6d3n6_DMR	13870851	13870950	1	.	100	.
chr1	.	wtEM_EN_g6d3n6_DMR	13874051	13874200	1	.	150	.
chr1	.	wtEM_EN_g6d3n6_DMR	13876901	13878600	1	.	1700	.
chr1	.	wtEM_EN_g6d3n6_DMR	13879151	13879250	1	.	100	.
chr1	.	wtEM_EN_g6d3n6_DMR	13880501	13880900	1	.	400	.
chr1	.	wtEM_EN_g6d3n6_DMR	13881451	13882000	1	.	550	.
chr1	.	wtEM_EN_g6d3n6_DMR	13894051	13894650	1	.	600	.
chr1	.	wtEM_EN_g6d3n6_DMR	13902551	13902900	1	.	350	.
chr1	.	wtEM_EN_g6d3n6_DMR	13908951	13909300	1	.	350	.
chr1	.	wtEM_EN_g6d3n6_DMR	13910001	13910750	1	.	750	.
chr1	.	wtEM_EN_g6d3n6_DMR	13918101	13918250	1	.	150	.
chr1	.	wtEM_EN_g6d3n6_DMR	13929001	13929150	1	.	150	.
chr1	.	wtEM_EN_g6d3n6_DMR	13935001	13935300	1	.	300	.
chr1	.	wtEM_EN_g6d3n6_DMR	13958951	13959100	1	.	150	.
chr1	.	wtEM_EN_g6d3n6_DMR	13967751	13968350	1	.	600	.
chr1	.	wtEM_EN_g6d3n6_DMR	13978851	13978950	1	.	100	.
chr1	.	wtEM_EN_g6d3n6_DMR	13980751	13980950	1	.	200	.
chr1	.	wtEM_EN_g6d3n6_DMR	13983401	13984200	1	.	800	.
chr1	.	wtEM_EN_g6d3n6_DMR	13985401	13985900	1	.	500	.
chr1	.	wtEM_EN_g6d3n6_DMR	13986551	13987200	1	.	650	.
chr1	.	wtEM_EN_g6d3n6_DMR	13987951	13988050	1	.	100	.
chr1	.	wtEM_EN_g6d3n6_DMR	13989101	13989300	1	.	200	.
chr1	.	wtEM_EN_g6d3n6_DMR	13989651	13991000	1	.	1350	.
chr1	.	wtEM_EN_g6d3n6_DMR	13991351	13991800	1	.	450	.
chr1	.	wtEM_EN_g6d3n6_DMR	13992451	13992650	1	.	200	.
chr1	.	wtEM_EN_g6d3n6_DMR	13993651	13994200	1	.	550	.
chr1	.	wtEM_EN_g6d3n6_DMR	13996101	13996300	1	.	200	.
chr1	.	wtEM_EN_g6d3n6_DMR	13996651	13996800	1	.	150	.
chr1	.	wtEM_EN_g6d3n6_DMR	13997451	13997700	1	.	250	.
chr1	.	wtEM_EN_g6d3n6_DMR	13999301	13999650	1	.	350	.
chr1	.	wtEM_EN_g6d3n6_DMR	14000101	14000200	1	.	100	.
chr1	.	wtEM_EN_g6d3n6_DMR	14000751	14001500	1	.	750	.
chr1	.	wtEM_EN_g6d3n6_DMR	14005251	14005450	1	.	200	.
chr1	.	wtEM_EN_g6d3n6_DMR	14020651	14021050	1	.	400	.
chr1	.	wtEM_EN_g6d3n6_DMR	14023901	14024000	1	.	100	.
chr1	.	wtEM_EN_g6d3n6_DMR	14035951	14036150	1	.	200	.
chr1	.	wtEM_EN_g6d3n6_DMR	14039951	14040500	1	.	550	.
chr1	.	wtEM_EN_g6d3n6_DMR	14041001	14041400	1	.	400	.
chr1	.	wtEM_EN_g6d3n6_DMR	14041751	14041850	1	.	100	.
chr1	.	wtEM_EN_g6d3n6_DMR	14044401	14044500	1	.	100	.
chr1	.	wtEM_EN_g6d3n6_DMR	14058001	14058650	1	.	650	.
chr1	.	wtEM_EN_g6d3n6_DMR	14070651	14071100	1	.	450	.
chr1	.	wtEM_EN_g6d3n6_DMR	14080201	14080300	1	.	100	.
chr1	.	wtEM_EN_g6d3n6_DMR	14115251	14116250	1	.	1000	.
chr1	.	wtEM_EN_g6d3n6_DMR	14120901	14121250	1	.	350	.
chr1	.	wtEM_EN_g6d3n6_DMR	14121651	14121800	1	.	150	.
chr1	.	wtEM_EN_g6d3n6_DMR	14123451	14123950	1	.	500	.
chr1	.	wtEM_EN_g6d3n6_DMR	14128001	14128150	1	.	150	.
chr1	.	wtEM_EN_g6d3n6_DMR	14145401	14145800	1	.	400	.
chr1	.	wtEM_EN_g6d3n6_DMR	14153851	14154000	1	.	150	.
chr1	.	wtEM_EN_g6d3n6_DMR	14155501	14155650	1	.	150	.
chr1	.	wtEM_EN_g6d3n6_DMR	14157201	14158450	1	.	1250	.
chr1	.	wtEM_EN_g6d3n6_DMR	14166701	14167000	1	.	300	.
chr1	.	wtEM_EN_g6d3n6_DMR	14187551	14188600	1	.	1050	.
chr1	.	wtEM_EN_g6d3n6_DMR	14227301	14227450	1	.	150	.
chr1	.	wtEM_EN_g6d3n6_DMR	14239401	14239600	1	.	200	.
chr1	.	wtEM_EN_g6d3n6_DMR	14259501	14259650	1	.	150	.
chr1	.	wtEM_EN_g6d3n6_DMR	14260151	14260450	1	.	300	.
chr1	.	wtEM_EN_g6d3n6_DMR	14266501	14266800	1	.	300	.
chr1	.	wtEM_EN_g6d3n6_DMR	14284501	14285050	1	.	550	.
chr1	.	wtEM_EN_g6d3n6_DMR	14286051	14286200	1	.	150	.
chr1	.	wtEM_EN_g6d3n6_DMR	14286851	14287350	1	.	500	.
chr1	.	wtEM_EN_g6d3n6_DMR	14288451	14289150	1	.	700	.
chr1	.	wtEM_EN_g6d3n6_DMR	14295301	14295400	1	.	100	.
chr1	.	wtEM_EN_g6d3n6_DMR	14300101	14300500	1	.	400	.
chr1	.	wtEM_EN_g6d3n6_DMR	14305601	14306050	1	.	450	.
chr1	.	wtEM_EN_g6d3n6_DMR	14312351	14312650	1	.	300	.
chr1	.	wtEM_EN_g6d3n6_DMR	14422901	14423050	1	.	150	.
chr1	.	wtEM_EN_g6d3n6_DMR	14486551	14486650	1	.	100	.
chr1	.	wtEM_EN_g6d3n6_DMR	14502801	14503100	1	.	300	.
chr1	.	wtEM_EN_g6d3n6_DMR	14584601	14584700	1	.	100	.
chr1	.	wtEM_EN_g6d3n6_DMR	14605901	14606050	1	.	150	.
chr1	.	wtEM_EN_g6d3n6_DMR	14607901	14608850	1	.	950	.
chr1	.	wtEM_EN_g6d3n6_DMR	14871551	14871650	1	.	100	.
chr1	.	wtEM_EN_g6d3n6_DMR	14884101	14884300	1	.	200	.
chr1	.	wtEM_EN_g6d3n6_DMR	14920701	14921000	1	.	300	.
chr1	.	wtEM_EN_g6d3n6_DMR	15001101	15001850	1	.	750	.
chr1	.	wtEM_EN_g6d3n6_DMR	15002651	15003500	1	.	850	.
chr1	.	wtEM_EN_g6d3n6_DMR	15004501	15005000	1	.	500	.
chr1	.	wtEM_EN_g6d3n6_DMR	15010101	15010500	1	.	400	.
chr1	.	wtEM_EN_g6d3n6_DMR	15059451	15060350	1	.	900	.
chr1	.	wtEM_EN_g6d3n6_DMR	15086551	15086800	1	.	250	.
chr1	.	wtEM_EN_g6d3n6_DMR	15234901	15235000	1	.	100	.
chr1	.	wtEM_EN_g6d3n6_DMR	15243751	15244300	1	.	550	.
chr1	.	wtEM_EN_g6d3n6_DMR	15376401	15376600	1	.	200	.
chr1	.	wtEM_EN_g6d3n6_DMR	15432301	15432400	1	.	100	.
chr1	.	wtEM_EN_g6d3n6_DMR	15437701	15437800	1	.	100	.
chr1	.	wtEM_EN_g6d3n6_DMR	15451751	15452050	1	.	300	.
chr1	.	wtEM_EN_g6d3n6_DMR	15461051	15461200	1	.	150	.
chr1	.	wtEM_EN_g6d3n6_DMR	15462401	15462650	1	.	250	.
chr1	.	wtEM_EN_g6d3n6_DMR	15468001	15468150	1	.	150	.
chr1	.	wtEM_EN_g6d3n6_DMR	15481351	15481450	1	.	100	.
chr1	.	wtEM_EN_g6d3n6_DMR	15492201	15492300	1	.	100	.
chr1	.	wtEM_EN_g6d3n6_DMR	15524351	15524600	1	.	250	.
chr1	.	wtEM_EN_g6d3n6_DMR	15547601	15547850	1	.	250	.
chr1	.	wtEM_EN_g6d3n6_DMR	15588301	15588400	1	.	100	.
chr1	.	wtEM_EN_g6d3n6_DMR	15601701	15601950	1	.	250	.
chr1	.	wtEM_EN_g6d3n6_DMR	15612601	15612700	1	.	100	.
chr1	.	wtEM_EN_g6d3n6_DMR	15616201	15617100	1	.	900	.
chr1	.	wtEM_EN_g6d3n6_DMR	15617551	15618150	1	.	600	.
chr1	.	wtEM_EN_g6d3n6_DMR	15621151	15621300	1	.	150	.
chr1	.	wtEM_EN_g6d3n6_DMR	15638201	15638400	1	.	200	.
chr1	.	wtEM_EN_g6d3n6_DMR	15639001	15639200	1	.	200	.
chr1	.	wtEM_EN_g6d3n6_DMR	15645201	15645300	1	.	100	.
chr1	.	wtEM_EN_g6d3n6_DMR	15646001	15648200	1	.	2200	.
chr1	.	wtEM_EN_g6d3n6_DMR	15648751	15649550	1	.	800	.
chr1	.	wtEM_EN_g6d3n6_DMR	15657451	15657550	1	.	100	.
chr1	.	wtEM_EN_g6d3n6_DMR	15659201	15659400	1	.	200	.
chr1	.	wtEM_EN_g6d3n6_DMR	15664551	15664700	1	.	150	.
chr1	.	wtEM_EN_g6d3n6_DMR	15676901	15677000	1	.	100	.
chr1	.	wtEM_EN_g6d3n6_DMR	15677351	15677500	1	.	150	.
chr1	.	wtEM_EN_g6d3n6_DMR	15687251	15687700	1	.	450	.
chr1	.	wtEM_EN_g6d3n6_DMR	15690451	15690800	1	.	350	.
chr1	.	wtEM_EN_g6d3n6_DMR	15691151	15691800	1	.	650	.
chr1	.	wtEM_EN_g6d3n6_DMR	15718951	15719700	1	.	750	.
chr1	.	wtEM_EN_g6d3n6_DMR	15723301	15723600	1	.	300	.
chr1	.	wtEM_EN_g6d3n6_DMR	15724151	15724500	1	.	350	.
chr1	.	wtEM_EN_g6d3n6_DMR	15730901	15731500	1	.	600	.
chr1	.	wtEM_EN_g6d3n6_DMR	15732051	15732550	1	.	500	.
chr1	.	wtEM_EN_g6d3n6_DMR	15756751	15757100	1	.	350	.
chr1	.	wtEM_EN_g6d3n6_DMR	15760051	15760900	1	.	850	.
chr1	.	wtEM_EN_g6d3n6_DMR	15762101	15762400	1	.	300	.
chr1	.	wtEM_EN_g6d3n6_DMR	15763751	15764100	1	.	350	.
chr1	.	wtEM_EN_g6d3n6_DMR	15784101	15784200	1	.	100	.
chr1	.	wtEM_EN_g6d3n6_DMR	15785301	15785450	1	.	150	.
chr1	.	wtEM_EN_g6d3n6_DMR	15802051	15802550	1	.	500	.
chr1	.	wtEM_EN_g6d3n6_DMR	15809051	15809650	1	.	600	.
chr1	.	wtEM_EN_g6d3n6_DMR	15817551	15817700	1	.	150	.
chr1	.	wtEM_EN_g6d3n6_DMR	15858451	15858850	1	.	400	.
chr1	.	wtEM_EN_g6d3n6_DMR	15874001	15874100	1	.	100	.
chr1	.	wtEM_EN_g6d3n6_DMR	15887151	15887250	1	.	100	.
chr1	.	wtEM_EN_g6d3n6_DMR	15887701	15888500	1	.	800	.
chr1	.	wtEM_EN_g6d3n6_DMR	15890451	15891000	1	.	550	.
chr1	.	wtEM_EN_g6d3n6_DMR	15891651	15892050	1	.	400	.
chr1	.	wtEM_EN_g6d3n6_DMR	15897201	15897450	1	.	250	.
chr1	.	wtEM_EN_g6d3n6_DMR	15908201	15908300	1	.	100	.
chr1	.	wtEM_EN_g6d3n6_DMR	15910051	15911000	1	.	950	.
chr1	.	wtEM_EN_g6d3n6_DMR	15911401	15911800	1	.	400	.
chr1	.	wtEM_EN_g6d3n6_DMR	15912451	15912600	1	.	150	.
chr1	.	wtEM_EN_g6d3n6_DMR	15913451	15913550	1	.	100	.
chr1	.	wtEM_EN_g6d3n6_DMR	15920701	15921150	1	.	450	.
chr1	.	wtEM_EN_g6d3n6_DMR	15921651	15924250	1	.	2600	.
chr1	.	wtEM_EN_g6d3n6_DMR	15934101	15934200	1	.	100	.
chr1	.	wtEM_EN_g6d3n6_DMR	15943951	15944900	1	.	950	.
chr1	.	wtEM_EN_g6d3n6_DMR	15945351	15946450	1	.	1100	.
chr1	.	wtEM_EN_g6d3n6_DMR	15967701	15968100	1	.	400	.
chr1	.	wtEM_EN_g6d3n6_DMR	15972251	15972500	1	.	250	.
chr1	.	wtEM_EN_g6d3n6_DMR	15973151	15974400	1	.	1250	.
chr1	.	wtEM_EN_g6d3n6_DMR	15974851	15974950	1	.	100	.
chr1	.	wtEM_EN_g6d3n6_DMR	15986451	15986550	1	.	100	.
chr1	.	wtEM_EN_g6d3n6_DMR	15987801	15987900	1	.	100	.
chr1	.	wtEM_EN_g6d3n6_DMR	15990701	15991050	1	.	350	.
chr1	.	wtEM_EN_g6d3n6_DMR	15991451	15991850	1	.	400	.
chr1	.	wtEM_EN_g6d3n6_DMR	15993051	15993350	1	.	300	.
chr1	.	wtEM_EN_g6d3n6_DMR	15995001	15995400	1	.	400	.
chr1	.	wtEM_EN_g6d3n6_DMR	15996151	15997800	1	.	1650	.
chr1	.	wtEM_EN_g6d3n6_DMR	16005451	16006250	1	.	800	.
chr1	.	wtEM_EN_g6d3n6_DMR	16006851	16008700	1	.	1850	.
chr1	.	wtEM_EN_g6d3n6_DMR	16011051	16012250	1	.	1200	.
chr1	.	wtEM_EN_g6d3n6_DMR	16031501	16031900	1	.	400	.
chr1	.	wtEM_EN_g6d3n6_DMR	16036801	16037000	1	.	200	.
chr1	.	wtEM_EN_g6d3n6_DMR	16037551	16037800	1	.	250	.
chr1	.	wtEM_EN_g6d3n6_DMR	16038851	16039300	1	.	450	.
chr1	.	wtEM_EN_g6d3n6_DMR	16053751	16054400	1	.	650	.
chr1	.	wtEM_EN_g6d3n6_DMR	16054801	16056500	1	.	1700	.
chr1	.	wtEM_EN_g6d3n6_DMR	16057101	16058200	1	.	1100	.
chr1	.	wtEM_EN_g6d3n6_DMR	16070501	16070600	1	.	100	.
chr1	.	wtEM_EN_g6d3n6_DMR	16071151	16071700	1	.	550	.
chr1	.	wtEM_EN_g6d3n6_DMR	16080951	16081050	1	.	100	.
chr1	.	wtEM_EN_g6d3n6_DMR	16097251	16097700	1	.	450	.
chr1	.	wtEM_EN_g6d3n6_DMR	16127551	16127650	1	.	100	.
chr1	.	wtEM_EN_g6d3n6_DMR	16136401	16136500	1	.	100	.
chr1	.	wtEM_EN_g6d3n6_DMR	16145401	16145900	1	.	500	.
chr1	.	wtEM_EN_g6d3n6_DMR	16151751	16151900	1	.	150	.
chr1	.	wtEM_EN_g6d3n6_DMR	16161701	16162350	1	.	650	.
chr1	.	wtEM_EN_g6d3n6_DMR	16164551	16164850	1	.	300	.
chr1	.	wtEM_EN_g6d3n6_DMR	16165201	16165550	1	.	350	.
chr1	.	wtEM_EN_g6d3n6_DMR	16167201	16167300	1	.	100	.
chr1	.	wtEM_EN_g6d3n6_DMR	16169701	16169850	1	.	150	.
chr1	.	wtEM_EN_g6d3n6_DMR	16170351	16170500	1	.	150	.
chr1	.	wtEM_EN_g6d3n6_DMR	16170901	16171000	1	.	100	.
chr1	.	wtEM_EN_g6d3n6_DMR	16171601	16172600	1	.	1000	.
chr1	.	wtEM_EN_g6d3n6_DMR	16174001	16174450	1	.	450	.
chr1	.	wtEM_EN_g6d3n6_DMR	16176451	16176650	1	.	200	.
chr1	.	wtEM_EN_g6d3n6_DMR	16184901	16185150	1	.	250	.
chr1	.	wtEM_EN_g6d3n6_DMR	16185901	16186150	1	.	250	.
chr1	.	wtEM_EN_g6d3n6_DMR	16186851	16187450	1	.	600	.
chr1	.	wtEM_EN_g6d3n6_DMR	16189301	16189600	1	.	300	.
chr1	.	wtEM_EN_g6d3n6_DMR	16190001	16190100	1	.	100	.
chr1	.	wtEM_EN_g6d3n6_DMR	16190751	16190900	1	.	150	.
chr1	.	wtEM_EN_g6d3n6_DMR	16194501	16194600	1	.	100	.
chr1	.	wtEM_EN_g6d3n6_DMR	16216551	16216650	1	.	100	.
chr1	.	wtEM_EN_g6d3n6_DMR	16218201	16218500	1	.	300	.
chr1	.	wtEM_EN_g6d3n6_DMR	16219001	16219150	1	.	150	.
chr1	.	wtEM_EN_g6d3n6_DMR	16221551	16221800	1	.	250	.
chr1	.	wtEM_EN_g6d3n6_DMR	16222401	16222500	1	.	100	.
chr1	.	wtEM_EN_g6d3n6_DMR	16225751	16225850	1	.	100	.
chr1	.	wtEM_EN_g6d3n6_DMR	16229901	16230000	1	.	100	.
chr1	.	wtEM_EN_g6d3n6_DMR	16234201	16234450	1	.	250	.
chr1	.	wtEM_EN_g6d3n6_DMR	16239651	16240150	1	.	500	.
chr1	.	wtEM_EN_g6d3n6_DMR	16247701	16249150	1	.	1450	.
chr1	.	wtEM_EN_g6d3n6_DMR	16249901	16250500	1	.	600	.
chr1	.	wtEM_EN_g6d3n6_DMR	16251801	16251900	1	.	100	.
chr1	.	wtEM_EN_g6d3n6_DMR	16255601	16255800	1	.	200	.
chr1	.	wtEM_EN_g6d3n6_DMR	16256451	16256650	1	.	200	.
chr1	.	wtEM_EN_g6d3n6_DMR	16257701	16258100	1	.	400	.
chr1	.	wtEM_EN_g6d3n6_DMR	16258751	16259050	1	.	300	.
chr1	.	wtEM_EN_g6d3n6_DMR	16261401	16261800	1	.	400	.
chr1	.	wtEM_EN_g6d3n6_DMR	16262751	16263250	1	.	500	.
chr1	.	wtEM_EN_g6d3n6_DMR	16276551	16276650	1	.	100	.
chr1	.	wtEM_EN_g6d3n6_DMR	16283951	16284050	1	.	100	.
chr1	.	wtEM_EN_g6d3n6_DMR	16293601	16293750	1	.	150	.
chr1	.	wtEM_EN_g6d3n6_DMR	16305551	16305700	1	.	150	.
chr1	.	wtEM_EN_g6d3n6_DMR	16322151	16322250	1	.	100	.
chr1	.	wtEM_EN_g6d3n6_DMR	16323901	16324950	1	.	1050	.
chr1	.	wtEM_EN_g6d3n6_DMR	16327351	16327550	1	.	200	.
chr1	.	wtEM_EN_g6d3n6_DMR	16329701	16330400	1	.	700	.
chr1	.	wtEM_EN_g6d3n6_DMR	16342351	16343250	1	.	900	.
chr1	.	wtEM_EN_g6d3n6_DMR	16344351	16346000	1	.	1650	.
chr1	.	wtEM_EN_g6d3n6_DMR	16349501	16349650	1	.	150	.
chr1	.	wtEM_EN_g6d3n6_DMR	16354801	16355150	1	.	350	.
chr1	.	wtEM_EN_g6d3n6_DMR	16361201	16361550	1	.	350	.
chr1	.	wtEM_EN_g6d3n6_DMR	16361951	16362200	1	.	250	.
chr1	.	wtEM_EN_g6d3n6_DMR	16363101	16363250	1	.	150	.
chr1	.	wtEM_EN_g6d3n6_DMR	16365751	16365850	1	.	100	.
chr1	.	wtEM_EN_g6d3n6_DMR	16366551	16366700	1	.	150	.
chr1	.	wtEM_EN_g6d3n6_DMR	16367051	16367300	1	.	250	.
chr1	.	wtEM_EN_g6d3n6_DMR	16383151	16383550	1	.	400	.
chr1	.	wtEM_EN_g6d3n6_DMR	16385251	16385450	1	.	200	.
chr1	.	wtEM_EN_g6d3n6_DMR	16411451	16411850	1	.	400	.
chr1	.	wtEM_EN_g6d3n6_DMR	16414051	16414200	1	.	150	.
chr1	.	wtEM_EN_g6d3n6_DMR	16416001	16416250	1	.	250	.
chr1	.	wtEM_EN_g6d3n6_DMR	16424901	16425100	1	.	200	.
chr1	.	wtEM_EN_g6d3n6_DMR	16430351	16430800	1	.	450	.
chr1	.	wtEM_EN_g6d3n6_DMR	16441551	16441750	1	.	200	.
chr1	.	wtEM_EN_g6d3n6_DMR	16453051	16453150	1	.	100	.
chr1	.	wtEM_EN_g6d3n6_DMR	16453751	16454150	1	.	400	.
chr1	.	wtEM_EN_g6d3n6_DMR	16454751	16455300	1	.	550	.
chr1	.	wtEM_EN_g6d3n6_DMR	16456251	16456350	1	.	100	.
chr1	.	wtEM_EN_g6d3n6_DMR	16458301	16458800	1	.	500	.
chr1	.	wtEM_EN_g6d3n6_DMR	16459301	16460200	1	.	900	.
chr1	.	wtEM_EN_g6d3n6_DMR	16462601	16462750	1	.	150	.
chr1	.	wtEM_EN_g6d3n6_DMR	16465901	16466200	1	.	300	.
chr1	.	wtEM_EN_g6d3n6_DMR	16468601	16469300	1	.	700	.
chr1	.	wtEM_EN_g6d3n6_DMR	16470001	16470250	1	.	250	.
chr1	.	wtEM_EN_g6d3n6_DMR	16476651	16476900	1	.	250	.
chr1	.	wtEM_EN_g6d3n6_DMR	16481551	16483350	1	.	1800	.
chr1	.	wtEM_EN_g6d3n6_DMR	16536551	16537500	1	.	950	.
chr1	.	wtEM_EN_g6d3n6_DMR	16538051	16538650	1	.	600	.
chr1	.	wtEM_EN_g6d3n6_DMR	16547951	16548100	1	.	150	.
chr1	.	wtEM_EN_g6d3n6_DMR	16550351	16550450	1	.	100	.
chr1	.	wtEM_EN_g6d3n6_DMR	16553601	16553950	1	.	350	.
chr1	.	wtEM_EN_g6d3n6_DMR	16560651	16561800	1	.	1150	.
chr1	.	wtEM_EN_g6d3n6_DMR	16570601	16570700	1	.	100	.
chr1	.	wtEM_EN_g6d3n6_DMR	16583651	16583800	1	.	150	.
chr1	.	wtEM_EN_g6d3n6_DMR	16594501	16594600	1	.	100	.
chr1	.	wtEM_EN_g6d3n6_DMR	16595801	16595900	1	.	100	.
chr1	.	wtEM_EN_g6d3n6_DMR	16596651	16597150	1	.	500	.
chr1	.	wtEM_EN_g6d3n6_DMR	16597601	16598950	1	.	1350	.
chr1	.	wtEM_EN_g6d3n6_DMR	16601251	16601400	1	.	150	.
chr1	.	wtEM_EN_g6d3n6_DMR	16602751	16603100	1	.	350	.
chr1	.	wtEM_EN_g6d3n6_DMR	16603551	16604000	1	.	450	.
chr1	.	wtEM_EN_g6d3n6_DMR	16605351	16606500	1	.	1150	.
chr1	.	wtEM_EN_g6d3n6_DMR	16607501	16607750	1	.	250	.
chr1	.	wtEM_EN_g6d3n6_DMR	16608501	16609750	1	.	1250	.
chr1	.	wtEM_EN_g6d3n6_DMR	16613701	16614150	1	.	450	.
chr1	.	wtEM_EN_g6d3n6_DMR	16614601	16615600	1	.	1000	.
chr1	.	wtEM_EN_g6d3n6_DMR	16616101	16616400	1	.	300	.
chr1	.	wtEM_EN_g6d3n6_DMR	16617401	16617550	1	.	150	.
chr1	.	wtEM_EN_g6d3n6_DMR	16648351	16648450	1	.	100	.
chr1	.	wtEM_EN_g6d3n6_DMR	16653951	16654050	1	.	100	.
chr1	.	wtEM_EN_g6d3n6_DMR	16655251	16655500	1	.	250	.
chr1	.	wtEM_EN_g6d3n6_DMR	16664651	16664750	1	.	100	.
chr1	.	wtEM_EN_g6d3n6_DMR	16668751	16669250	1	.	500	.
chr1	.	wtEM_EN_g6d3n6_DMR	16669901	16670200	1	.	300	.
chr1	.	wtEM_EN_g6d3n6_DMR	16671001	16671150	1	.	150	.
chr1	.	wtEM_EN_g6d3n6_DMR	16673401	16673550	1	.	150	.
chr1	.	wtEM_EN_g6d3n6_DMR	16673951	16674350	1	.	400	.
chr1	.	wtEM_EN_g6d3n6_DMR	16675201	16676500	1	.	1300	.
chr1	.	wtEM_EN_g6d3n6_DMR	16677001	16677900	1	.	900	.
chr1	.	wtEM_EN_g6d3n6_DMR	16687201	16687450	1	.	250	.
chr1	.	wtEM_EN_g6d3n6_DMR	16692451	16692650	1	.	200	.
chr1	.	wtEM_EN_g6d3n6_DMR	16703451	16704400	1	.	950	.
chr1	.	wtEM_EN_g6d3n6_DMR	16709001	16709650	1	.	650	.
chr1	.	wtEM_EN_g6d3n6_DMR	16710001	16710300	1	.	300	.
chr1	.	wtEM_EN_g6d3n6_DMR	16712701	16712950	1	.	250	.
chr1	.	wtEM_EN_g6d3n6_DMR	16713551	16714200	1	.	650	.
chr1	.	wtEM_EN_g6d3n6_DMR	16722601	16722950	1	.	350	.
chr1	.	wtEM_EN_g6d3n6_DMR	16757201	16757450	1	.	250	.
chr1	.	wtEM_EN_g6d3n6_DMR	16760301	16760600	1	.	300	.
chr1	.	wtEM_EN_g6d3n6_DMR	16764051	16764600	1	.	550	.
chr1	.	wtEM_EN_g6d3n6_DMR	16771151	16771250	1	.	100	.
chr1	.	wtEM_EN_g6d3n6_DMR	16772351	16772750	1	.	400	.
chr1	.	wtEM_EN_g6d3n6_DMR	16776051	16776150	1	.	100	.
chr1	.	wtEM_EN_g6d3n6_DMR	16776601	16776950	1	.	350	.
chr1	.	wtEM_EN_g6d3n6_DMR	16781001	16781200	1	.	200	.
chr1	.	wtEM_EN_g6d3n6_DMR	16783151	16783500	1	.	350	.
chr1	.	wtEM_EN_g6d3n6_DMR	16794051	16794550	1	.	500	.
chr1	.	wtEM_EN_g6d3n6_DMR	16796501	16796850	1	.	350	.
chr1	.	wtEM_EN_g6d3n6_DMR	16798301	16798650	1	.	350	.
chr1	.	wtEM_EN_g6d3n6_DMR	16805351	16805900	1	.	550	.
chr1	.	wtEM_EN_g6d3n6_DMR	16806251	16806600	1	.	350	.
chr1	.	wtEM_EN_g6d3n6_DMR	16807151	16807950	1	.	800	.
chr1	.	wtEM_EN_g6d3n6_DMR	16809001	16809100	1	.	100	.
chr1	.	wtEM_EN_g6d3n6_DMR	16823001	16823100	1	.	100	.
chr1	.	wtEM_EN_g6d3n6_DMR	16830101	16830450	1	.	350	.
chr1	.	wtEM_EN_g6d3n6_DMR	16831901	16832050	1	.	150	.
chr1	.	wtEM_EN_g6d3n6_DMR	16832901	16833200	1	.	300	.
chr1	.	wtEM_EN_g6d3n6_DMR	16844051	16844250	1	.	200	.
chr1	.	wtEM_EN_g6d3n6_DMR	16845301	16845500	1	.	200	.
chr1	.	wtEM_EN_g6d3n6_DMR	16845901	16846650	1	.	750	.
chr1	.	wtEM_EN_g6d3n6_DMR	16863601	16863950	1	.	350	.
chr1	.	wtEM_EN_g6d3n6_DMR	16865701	16865800	1	.	100	.
chr1	.	wtEM_EN_g6d3n6_DMR	16870151	16870400	1	.	250	.
chr1	.	wtEM_EN_g6d3n6_DMR	16873401	16873600	1	.	200	.
chr1	.	wtEM_EN_g6d3n6_DMR	16879651	16879900	1	.	250	.
chr1	.	wtEM_EN_g6d3n6_DMR	16882001	16882500	1	.	500	.
chr1	.	wtEM_EN_g6d3n6_DMR	16882901	16883150	1	.	250	.
chr1	.	wtEM_EN_g6d3n6_DMR	16884201	16884650	1	.	450	.
chr1	.	wtEM_EN_g6d3n6_DMR	16888401	16889400	1	.	1000	.
chr1	.	wtEM_EN_g6d3n6_DMR	16892351	16892500	1	.	150	.
chr1	.	wtEM_EN_g6d3n6_DMR	16893401	16893500	1	.	100	.
chr1	.	wtEM_EN_g6d3n6_DMR	16901801	16902200	1	.	400	.
chr1	.	wtEM_EN_g6d3n6_DMR	16912801	16913100	1	.	300	.
chr1	.	wtEM_EN_g6d3n6_DMR	16913901	16914000	1	.	100	.
chr1	.	wtEM_EN_g6d3n6_DMR	16927251	16927400	1	.	150	.
chr1	.	wtEM_EN_g6d3n6_DMR	16937951	16938100	1	.	150	.
chr1	.	wtEM_EN_g6d3n6_DMR	16941601	16941750	1	.	150	.
chr1	.	wtEM_EN_g6d3n6_DMR	16954801	16956050	1	.	1250	.
chr1	.	wtEM_EN_g6d3n6_DMR	16956701	16956950	1	.	250	.
chr1	.	wtEM_EN_g6d3n6_DMR	16971801	16972050	1	.	250	.
chr1	.	wtEM_EN_g6d3n6_DMR	16977351	16977850	1	.	500	.
chr1	.	wtEM_EN_g6d3n6_DMR	16988401	16988800	1	.	400	.
chr1	.	wtEM_EN_g6d3n6_DMR	16998851	16999000	1	.	150	.
chr1	.	wtEM_EN_g6d3n6_DMR	17002651	17003050	1	.	400	.
chr1	.	wtEM_EN_g6d3n6_DMR	17007201	17007400	1	.	200	.
chr1	.	wtEM_EN_g6d3n6_DMR	17010751	17011100	1	.	350	.
chr1	.	wtEM_EN_g6d3n6_DMR	17019301	17020900	1	.	1600	.
chr1	.	wtEM_EN_g6d3n6_DMR	17021501	17023150	1	.	1650	.
chr1	.	wtEM_EN_g6d3n6_DMR	17025651	17025800	1	.	150	.
chr1	.	wtEM_EN_g6d3n6_DMR	17026201	17026400	1	.	200	.
chr1	.	wtEM_EN_g6d3n6_DMR	17028601	17028700	1	.	100	.
chr1	.	wtEM_EN_g6d3n6_DMR	17031451	17031600	1	.	150	.
chr1	.	wtEM_EN_g6d3n6_DMR	17062001	17062150	1	.	150	.
chr1	.	wtEM_EN_g6d3n6_DMR	17073801	17073950	1	.	150	.
chr1	.	wtEM_EN_g6d3n6_DMR	17074301	17075150	1	.	850	.
chr1	.	wtEM_EN_g6d3n6_DMR	17079301	17079700	1	.	400	.
chr1	.	wtEM_EN_g6d3n6_DMR	17093351	17093450	1	.	100	.
chr1	.	wtEM_EN_g6d3n6_DMR	17093951	17094100	1	.	150	.
chr1	.	wtEM_EN_g6d3n6_DMR	17094451	17094700	1	.	250	.
chr1	.	wtEM_EN_g6d3n6_DMR	17099551	17099750	1	.	200	.
chr1	.	wtEM_EN_g6d3n6_DMR	17106201	17107550	1	.	1350	.
chr1	.	wtEM_EN_g6d3n6_DMR	17109751	17109900	1	.	150	.
chr1	.	wtEM_EN_g6d3n6_DMR	17112501	17112600	1	.	100	.
chr1	.	wtEM_EN_g6d3n6_DMR	17113951	17114050	1	.	100	.
chr1	.	wtEM_EN_g6d3n6_DMR	17117251	17117350	1	.	100	.
chr1	.	wtEM_EN_g6d3n6_DMR	17118551	17119050	1	.	500	.
chr1	.	wtEM_EN_g6d3n6_DMR	17136501	17136700	1	.	200	.
chr1	.	wtEM_EN_g6d3n6_DMR	17138451	17138700	1	.	250	.
chr1	.	wtEM_EN_g6d3n6_DMR	17139051	17140550	1	.	1500	.
chr1	.	wtEM_EN_g6d3n6_DMR	17140951	17142300	1	.	1350	.
chr1	.	wtEM_EN_g6d3n6_DMR	17142701	17143300	1	.	600	.
chr1	.	wtEM_EN_g6d3n6_DMR	17143701	17144050	1	.	350	.
chr1	.	wtEM_EN_g6d3n6_DMR	17144401	17145650	1	.	1250	.
chr1	.	wtEM_EN_g6d3n6_DMR	17146001	17146800	1	.	800	.
chr1	.	wtEM_EN_g6d3n6_DMR	17147151	17147500	1	.	350	.
chr1	.	wtEM_EN_g6d3n6_DMR	17148001	17148350	1	.	350	.
chr1	.	wtEM_EN_g6d3n6_DMR	17155101	17155250	1	.	150	.
chr1	.	wtEM_EN_g6d3n6_DMR	17174251	17174350	1	.	100	.
chr1	.	wtEM_EN_g6d3n6_DMR	17181101	17181550	1	.	450	.
chr1	.	wtEM_EN_g6d3n6_DMR	17190101	17190300	1	.	200	.
chr1	.	wtEM_EN_g6d3n6_DMR	17190751	17191050	1	.	300	.
chr1	.	wtEM_EN_g6d3n6_DMR	17204051	17204300	1	.	250	.
chr1	.	wtEM_EN_g6d3n6_DMR	17252951	17253100	1	.	150	.
chr1	.	wtEM_EN_g6d3n6_DMR	17276751	17276900	1	.	150	.
chr1	.	wtEM_EN_g6d3n6_DMR	17280651	17281450	1	.	800	.
chr1	.	wtEM_EN_g6d3n6_DMR	17284851	17285100	1	.	250	.
chr1	.	wtEM_EN_g6d3n6_DMR	17297201	17297500	1	.	300	.
chr1	.	wtEM_EN_g6d3n6_DMR	17308251	17308500	1	.	250	.
chr1	.	wtEM_EN_g6d3n6_DMR	17314801	17316600	1	.	1800	.
chr1	.	wtEM_EN_g6d3n6_DMR	17317551	17320150	1	.	2600	.
chr1	.	wtEM_EN_g6d3n6_DMR	17320651	17321200	1	.	550	.
chr1	.	wtEM_EN_g6d3n6_DMR	17337851	17338100	1	.	250	.
chr1	.	wtEM_EN_g6d3n6_DMR	17343901	17344200	1	.	300	.
chr1	.	wtEM_EN_g6d3n6_DMR	17352101	17352500	1	.	400	.
chr1	.	wtEM_EN_g6d3n6_DMR	17367401	17367550	1	.	150	.
chr1	.	wtEM_EN_g6d3n6_DMR	17368351	17368750	1	.	400	.
chr1	.	wtEM_EN_g6d3n6_DMR	17380551	17380750	1	.	200	.
chr1	.	wtEM_EN_g6d3n6_DMR	17389351	17389500	1	.	150	.
chr1	.	wtEM_EN_g6d3n6_DMR	17404851	17405600	1	.	750	.
chr1	.	wtEM_EN_g6d3n6_DMR	17406001	17406100	1	.	100	.
chr1	.	wtEM_EN_g6d3n6_DMR	17406851	17407200	1	.	350	.
chr1	.	wtEM_EN_g6d3n6_DMR	17408251	17408600	1	.	350	.
chr1	.	wtEM_EN_g6d3n6_DMR	17416551	17416950	1	.	400	.
chr1	.	wtEM_EN_g6d3n6_DMR	17417901	17418600	1	.	700	.
chr1	.	wtEM_EN_g6d3n6_DMR	17419201	17419300	1	.	100	.
chr1	.	wtEM_EN_g6d3n6_DMR	17446951	17447350	1	.	400	.
chr1	.	wtEM_EN_g6d3n6_DMR	17451201	17451300	1	.	100	.
chr1	.	wtEM_EN_g6d3n6_DMR	17505451	17505950	1	.	500	.
chr1	.	wtEM_EN_g6d3n6_DMR	17513551	17513950	1	.	400	.
chr1	.	wtEM_EN_g6d3n6_DMR	17514901	17515450	1	.	550	.
chr1	.	wtEM_EN_g6d3n6_DMR	17517651	17517750	1	.	100	.
chr1	.	wtEM_EN_g6d3n6_DMR	17518501	17518600	1	.	100	.
chr1	.	wtEM_EN_g6d3n6_DMR	17538351	17538500	1	.	150	.
chr1	.	wtEM_EN_g6d3n6_DMR	17539501	17539600	1	.	100	.
chr1	.	wtEM_EN_g6d3n6_DMR	17545601	17545750	1	.	150	.
chr1	.	wtEM_EN_g6d3n6_DMR	17546251	17547200	1	.	950	.
chr1	.	wtEM_EN_g6d3n6_DMR	17548801	17549000	1	.	200	.
chr1	.	wtEM_EN_g6d3n6_DMR	17549501	17549700	1	.	200	.
chr1	.	wtEM_EN_g6d3n6_DMR	17550151	17550350	1	.	200	.
chr1	.	wtEM_EN_g6d3n6_DMR	17551751	17552150	1	.	400	.
chr1	.	wtEM_EN_g6d3n6_DMR	17554001	17554150	1	.	150	.
chr1	.	wtEM_EN_g6d3n6_DMR	17555501	17555750	1	.	250	.
chr1	.	wtEM_EN_g6d3n6_DMR	17557201	17557550	1	.	350	.
chr1	.	wtEM_EN_g6d3n6_DMR	17558151	17558250	1	.	100	.
chr1	.	wtEM_EN_g6d3n6_DMR	17575901	17576100	1	.	200	.
chr1	.	wtEM_EN_g6d3n6_DMR	17581751	17582000	1	.	250	.
chr1	.	wtEM_EN_g6d3n6_DMR	17610001	17610100	1	.	100	.
chr1	.	wtEM_EN_g6d3n6_DMR	17613801	17614300	1	.	500	.
chr1	.	wtEM_EN_g6d3n6_DMR	17617701	17617850	1	.	150	.
chr1	.	wtEM_EN_g6d3n6_DMR	17626801	17627050	1	.	250	.
chr1	.	wtEM_EN_g6d3n6_DMR	17658901	17659400	1	.	500	.
chr1	.	wtEM_EN_g6d3n6_DMR	17659751	17660650	1	.	900	.
chr1	.	wtEM_EN_g6d3n6_DMR	17671101	17671550	1	.	450	.
chr1	.	wtEM_EN_g6d3n6_DMR	17674651	17675000	1	.	350	.
chr1	.	wtEM_EN_g6d3n6_DMR	17693351	17693500	1	.	150	.
chr1	.	wtEM_EN_g6d3n6_DMR	17693951	17694200	1	.	250	.
chr1	.	wtEM_EN_g6d3n6_DMR	17713701	17714100	1	.	400	.
chr1	.	wtEM_EN_g6d3n6_DMR	17716751	17717200	1	.	450	.
chr1	.	wtEM_EN_g6d3n6_DMR	17717651	17717900	1	.	250	.
chr1	.	wtEM_EN_g6d3n6_DMR	17721351	17721450	1	.	100	.
chr1	.	wtEM_EN_g6d3n6_DMR	17731251	17731550	1	.	300	.
chr1	.	wtEM_EN_g6d3n6_DMR	17754651	17754750	1	.	100	.
chr1	.	wtEM_EN_g6d3n6_DMR	17759251	17759450	1	.	200	.
chr1	.	wtEM_EN_g6d3n6_DMR	17824351	17824750	1	.	400	.
chr1	.	wtEM_EN_g6d3n6_DMR	17841551	17842250	1	.	700	.
chr1	.	wtEM_EN_g6d3n6_DMR	17864751	17865050	1	.	300	.
chr1	.	wtEM_EN_g6d3n6_DMR	17877501	17877950	1	.	450	.
chr1	.	wtEM_EN_g6d3n6_DMR	17902751	17902900	1	.	150	.
chr1	.	wtEM_EN_g6d3n6_DMR	17906951	17907450	1	.	500	.
chr1	.	wtEM_EN_g6d3n6_DMR	17928151	17928550	1	.	400	.
chr1	.	wtEM_EN_g6d3n6_DMR	17940651	17941600	1	.	950	.
chr1	.	wtEM_EN_g6d3n6_DMR	17942601	17942800	1	.	200	.
chr1	.	wtEM_EN_g6d3n6_DMR	17983301	17983950	1	.	650	.
chr1	.	wtEM_EN_g6d3n6_DMR	17996651	17997200	1	.	550	.
chr1	.	wtEM_EN_g6d3n6_DMR	18037401	18037650	1	.	250	.
chr1	.	wtEM_EN_g6d3n6_DMR	18051601	18052100	1	.	500	.
chr1	.	wtEM_EN_g6d3n6_DMR	18073451	18073700	1	.	250	.
chr1	.	wtEM_EN_g6d3n6_DMR	18087801	18087900	1	.	100	.
chr1	.	wtEM_EN_g6d3n6_DMR	18092901	18093850	1	.	950	.
chr1	.	wtEM_EN_g6d3n6_DMR	18097301	18097450	1	.	150	.
chr1	.	wtEM_EN_g6d3n6_DMR	18098401	18099200	1	.	800	.
chr1	.	wtEM_EN_g6d3n6_DMR	18104651	18104800	1	.	150	.
chr1	.	wtEM_EN_g6d3n6_DMR	18114451	18114950	1	.	500	.
chr1	.	wtEM_EN_g6d3n6_DMR	18130451	18130650	1	.	200	.
chr1	.	wtEM_EN_g6d3n6_DMR	18134051	18134750	1	.	700	.
chr1	.	wtEM_EN_g6d3n6_DMR	18135501	18135750	1	.	250	.
chr1	.	wtEM_EN_g6d3n6_DMR	18141901	18142000	1	.	100	.
chr1	.	wtEM_EN_g6d3n6_DMR	18158201	18158300	1	.	100	.
chr1	.	wtEM_EN_g6d3n6_DMR	18167851	18168000	1	.	150	.
chr1	.	wtEM_EN_g6d3n6_DMR	18168801	18169200	1	.	400	.
chr1	.	wtEM_EN_g6d3n6_DMR	18216051	18216200	1	.	150	.
chr1	.	wtEM_EN_g6d3n6_DMR	18217601	18217700	1	.	100	.
chr1	.	wtEM_EN_g6d3n6_DMR	18273451	18273750	1	.	300	.
chr1	.	wtEM_EN_g6d3n6_DMR	18274901	18275700	1	.	800	.
chr1	.	wtEM_EN_g6d3n6_DMR	18285501	18286100	1	.	600	.
chr1	.	wtEM_EN_g6d3n6_DMR	18301201	18301300	1	.	100	.
chr1	.	wtEM_EN_g6d3n6_DMR	18324501	18324800	1	.	300	.
chr1	.	wtEM_EN_g6d3n6_DMR	18328401	18328700	1	.	300	.
chr1	.	wtEM_EN_g6d3n6_DMR	18329551	18329800	1	.	250	.
chr1	.	wtEM_EN_g6d3n6_DMR	18336451	18336550	1	.	100	.
chr1	.	wtEM_EN_g6d3n6_DMR	18341901	18342150	1	.	250	.
chr1	.	wtEM_EN_g6d3n6_DMR	18357101	18357350	1	.	250	.
chr1	.	wtEM_EN_g6d3n6_DMR	18359701	18359800	1	.	100	.
chr1	.	wtEM_EN_g6d3n6_DMR	18383951	18384050	1	.	100	.
chr1	.	wtEM_EN_g6d3n6_DMR	18384401	18384600	1	.	200	.
chr1	.	wtEM_EN_g6d3n6_DMR	18391001	18391150	1	.	150	.
chr1	.	wtEM_EN_g6d3n6_DMR	18399201	18399800	1	.	600	.
chr1	.	wtEM_EN_g6d3n6_DMR	18406601	18406700	1	.	100	.
chr1	.	wtEM_EN_g6d3n6_DMR	18424651	18424850	1	.	200	.
chr1	.	wtEM_EN_g6d3n6_DMR	18427601	18427950	1	.	350	.
chr1	.	wtEM_EN_g6d3n6_DMR	18428301	18428450	1	.	150	.
chr1	.	wtEM_EN_g6d3n6_DMR	18441451	18441850	1	.	400	.
chr1	.	wtEM_EN_g6d3n6_DMR	18460501	18461500	1	.	1000	.
chr1	.	wtEM_EN_g6d3n6_DMR	18475001	18475850	1	.	850	.
chr1	.	wtEM_EN_g6d3n6_DMR	18498951	18499050	1	.	100	.
chr1	.	wtEM_EN_g6d3n6_DMR	18510501	18510950	1	.	450	.
chr1	.	wtEM_EN_g6d3n6_DMR	18526951	18527050	1	.	100	.
chr1	.	wtEM_EN_g6d3n6_DMR	18531401	18531750	1	.	350	.
chr1	.	wtEM_EN_g6d3n6_DMR	18532101	18532200	1	.	100	.
chr1	.	wtEM_EN_g6d3n6_DMR	18538401	18539000	1	.	600	.
chr1	.	wtEM_EN_g6d3n6_DMR	18539701	18539950	1	.	250	.
chr1	.	wtEM_EN_g6d3n6_DMR	18554251	18554350	1	.	100	.
chr1	.	wtEM_EN_g6d3n6_DMR	18555801	18556000	1	.	200	.
chr1	.	wtEM_EN_g6d3n6_DMR	18583701	18584200	1	.	500	.
chr1	.	wtEM_EN_g6d3n6_DMR	18602751	18602900	1	.	150	.
chr1	.	wtEM_EN_g6d3n6_DMR	18611901	18612150	1	.	250	.
chr1	.	wtEM_EN_g6d3n6_DMR	18612651	18612750	1	.	100	.
chr1	.	wtEM_EN_g6d3n6_DMR	18644501	18644850	1	.	350	.
chr1	.	wtEM_EN_g6d3n6_DMR	18645401	18645800	1	.	400	.
chr1	.	wtEM_EN_g6d3n6_DMR	18648001	18648100	1	.	100	.
chr1	.	wtEM_EN_g6d3n6_DMR	18652001	18652400	1	.	400	.
chr1	.	wtEM_EN_g6d3n6_DMR	18656601	18657150	1	.	550	.
chr1	.	wtEM_EN_g6d3n6_DMR	18661501	18662050	1	.	550	.
chr1	.	wtEM_EN_g6d3n6_DMR	18667851	18668050	1	.	200	.
chr1	.	wtEM_EN_g6d3n6_DMR	18770751	18770850	1	.	100	.
chr1	.	wtEM_EN_g6d3n6_DMR	18773401	18773500	1	.	100	.
chr1	.	wtEM_EN_g6d3n6_DMR	18773901	18774050	1	.	150	.
chr1	.	wtEM_EN_g6d3n6_DMR	18803251	18803400	1	.	150	.
chr1	.	wtEM_EN_g6d3n6_DMR	18808451	18808850	1	.	400	.
chr1	.	wtEM_EN_g6d3n6_DMR	18814451	18814550	1	.	100	.
chr1	.	wtEM_EN_g6d3n6_DMR	18820401	18820500	1	.	100	.
chr1	.	wtEM_EN_g6d3n6_DMR	18821101	18821250	1	.	150	.
chr1	.	wtEM_EN_g6d3n6_DMR	18850051	18850150	1	.	100	.
chr1	.	wtEM_EN_g6d3n6_DMR	18877601	18878100	1	.	500	.
chr1	.	wtEM_EN_g6d3n6_DMR	18881901	18882100	1	.	200	.
chr1	.	wtEM_EN_g6d3n6_DMR	18889501	18889600	1	.	100	.
chr1	.	wtEM_EN_g6d3n6_DMR	18890851	18891450	1	.	600	.
chr1	.	wtEM_EN_g6d3n6_DMR	18891851	18892000	1	.	150	.
chr1	.	wtEM_EN_g6d3n6_DMR	18896451	18896600	1	.	150	.
chr1	.	wtEM_EN_g6d3n6_DMR	18898001	18898150	1	.	150	.
chr1	.	wtEM_EN_g6d3n6_DMR	18911651	18911850	1	.	200	.
chr1	.	wtEM_EN_g6d3n6_DMR	18959501	18959600	1	.	100	.
chr1	.	wtEM_EN_g6d3n6_DMR	18960951	18961050	1	.	100	.
chr1	.	wtEM_EN_g6d3n6_DMR	18975351	18975550	1	.	200	.
chr1	.	wtEM_EN_g6d3n6_DMR	18987251	18987600	1	.	350	.
chr1	.	wtEM_EN_g6d3n6_DMR	18993151	18993300	1	.	150	.
chr1	.	wtEM_EN_g6d3n6_DMR	19022901	19024100	1	.	1200	.
chr1	.	wtEM_EN_g6d3n6_DMR	19025901	19027600	1	.	1700	.
chr1	.	wtEM_EN_g6d3n6_DMR	19027951	19028350	1	.	400	.
chr1	.	wtEM_EN_g6d3n6_DMR	19030901	19031250	1	.	350	.
chr1	.	wtEM_EN_g6d3n6_DMR	19042201	19042300	1	.	100	.
chr1	.	wtEM_EN_g6d3n6_DMR	19058901	19059000	1	.	100	.
chr1	.	wtEM_EN_g6d3n6_DMR	19077251	19077500	1	.	250	.
chr1	.	wtEM_EN_g6d3n6_DMR	19090101	19090500	1	.	400	.
chr1	.	wtEM_EN_g6d3n6_DMR	19112701	19112900	1	.	200	.
chr1	.	wtEM_EN_g6d3n6_DMR	19196401	19196500	1	.	100	.
chr1	.	wtEM_EN_g6d3n6_DMR	19201551	19202100	1	.	550	.
chr1	.	wtEM_EN_g6d3n6_DMR	19221901	19222150	1	.	250	.
chr1	.	wtEM_EN_g6d3n6_DMR	19223401	19223950	1	.	550	.
chr1	.	wtEM_EN_g6d3n6_DMR	19237501	19237750	1	.	250	.
chr1	.	wtEM_EN_g6d3n6_DMR	19252101	19252700	1	.	600	.
chr1	.	wtEM_EN_g6d3n6_DMR	19272001	19272200	1	.	200	.
chr1	.	wtEM_EN_g6d3n6_DMR	19287551	19287700	1	.	150	.
chr1	.	wtEM_EN_g6d3n6_DMR	19307651	19307900	1	.	250	.
chr1	.	wtEM_EN_g6d3n6_DMR	19320001	19320800	1	.	800	.
chr1	.	wtEM_EN_g6d3n6_DMR	19321501	19322250	1	.	750	.
chr1	.	wtEM_EN_g6d3n6_DMR	19333701	19334100	1	.	400	.
chr1	.	wtEM_EN_g6d3n6_DMR	19339951	19340400	1	.	450	.
chr1	.	wtEM_EN_g6d3n6_DMR	19356551	19356650	1	.	100	.
chr1	.	wtEM_EN_g6d3n6_DMR	19365301	19365400	1	.	100	.
chr1	.	wtEM_EN_g6d3n6_DMR	19376151	19376500	1	.	350	.
chr1	.	wtEM_EN_g6d3n6_DMR	19393151	19393500	1	.	350	.
chr1	.	wtEM_EN_g6d3n6_DMR	19402251	19402450	1	.	200	.
chr1	.	wtEM_EN_g6d3n6_DMR	19406951	19407450	1	.	500	.
chr1	.	wtEM_EN_g6d3n6_DMR	19407951	19408250	1	.	300	.
chr1	.	wtEM_EN_g6d3n6_DMR	19415001	19415250	1	.	250	.
chr1	.	wtEM_EN_g6d3n6_DMR	19430201	19430450	1	.	250	.
chr1	.	wtEM_EN_g6d3n6_DMR	19432351	19432700	1	.	350	.
chr1	.	wtEM_EN_g6d3n6_DMR	19433801	19434050	1	.	250	.
chr1	.	wtEM_EN_g6d3n6_DMR	19444801	19444950	1	.	150	.
chr1	.	wtEM_EN_g6d3n6_DMR	19530651	19530750	1	.	100	.
chr1	.	wtEM_EN_g6d3n6_DMR	19592001	19592600	1	.	600	.
chr1	.	wtEM_EN_g6d3n6_DMR	19596651	19597600	1	.	950	.
chr1	.	wtEM_EN_g6d3n6_DMR	19640101	19640300	1	.	200	.
chr1	.	wtEM_EN_g6d3n6_DMR	19658151	19659250	1	.	1100	.
chr1	.	wtEM_EN_g6d3n6_DMR	19717201	19717300	1	.	100	.
chr1	.	wtEM_EN_g6d3n6_DMR	19719951	19720150	1	.	200	.
chr1	.	wtEM_EN_g6d3n6_DMR	19721751	19722400	1	.	650	.
chr1	.	wtEM_EN_g6d3n6_DMR	19728601	19729600	1	.	1000	.
chr1	.	wtEM_EN_g6d3n6_DMR	19729951	19730200	1	.	250	.
chr1	.	wtEM_EN_g6d3n6_DMR	19732101	19732450	1	.	350	.
chr1	.	wtEM_EN_g6d3n6_DMR	19736851	19737700	1	.	850	.
chr1	.	wtEM_EN_g6d3n6_DMR	19738101	19738750	1	.	650	.
chr1	.	wtEM_EN_g6d3n6_DMR	19739201	19739500	1	.	300	.
chr1	.	wtEM_EN_g6d3n6_DMR	19745501	19745700	1	.	200	.
chr1	.	wtEM_EN_g6d3n6_DMR	19747701	19748050	1	.	350	.
chr1	.	wtEM_EN_g6d3n6_DMR	19767001	19767100	1	.	100	.
chr1	.	wtEM_EN_g6d3n6_DMR	19778401	19778600	1	.	200	.
chr1	.	wtEM_EN_g6d3n6_DMR	19801401	19801900	1	.	500	.
chr1	.	wtEM_EN_g6d3n6_DMR	19802501	19802600	1	.	100	.
chr1	.	wtEM_EN_g6d3n6_DMR	19811801	19811950	1	.	150	.
chr1	.	wtEM_EN_g6d3n6_DMR	19812501	19813550	1	.	1050	.
chr1	.	wtEM_EN_g6d3n6_DMR	19885501	19885800	1	.	300	.
chr1	.	wtEM_EN_g6d3n6_DMR	19895401	19895800	1	.	400	.
chr1	.	wtEM_EN_g6d3n6_DMR	19912901	19913150	1	.	250	.
chr1	.	wtEM_EN_g6d3n6_DMR	19936701	19937350	1	.	650	.
chr1	.	wtEM_EN_g6d3n6_DMR	19947251	19947350	1	.	100	.
chr1	.	wtEM_EN_g6d3n6_DMR	19947901	19948050	1	.	150	.
chr1	.	wtEM_EN_g6d3n6_DMR	20027851	20028000	1	.	150	.
chr1	.	wtEM_EN_g6d3n6_DMR	20036701	20037150	1	.	450	.
chr1	.	wtEM_EN_g6d3n6_DMR	20066401	20066700	1	.	300	.
chr1	.	wtEM_EN_g6d3n6_DMR	20110301	20110500	1	.	200	.
chr1	.	wtEM_EN_g6d3n6_DMR	20116401	20116650	1	.	250	.
chr1	.	wtEM_EN_g6d3n6_DMR	20122751	20122900	1	.	150	.
chr1	.	wtEM_EN_g6d3n6_DMR	20128951	20129050	1	.	100	.
chr1	.	wtEM_EN_g6d3n6_DMR	20130251	20130450	1	.	200	.
chr1	.	wtEM_EN_g6d3n6_DMR	20157951	20158050	1	.	100	.
chr1	.	wtEM_EN_g6d3n6_DMR	20191251	20191700	1	.	450	.
chr1	.	wtEM_EN_g6d3n6_DMR	20194351	20195250	1	.	900	.
chr1	.	wtEM_EN_g6d3n6_DMR	20230101	20230400	1	.	300	.
chr1	.	wtEM_EN_g6d3n6_DMR	20276451	20276600	1	.	150	.
chr1	.	wtEM_EN_g6d3n6_DMR	20298951	20299600	1	.	650	.
chr1	.	wtEM_EN_g6d3n6_DMR	20306251	20306350	1	.	100	.
chr1	.	wtEM_EN_g6d3n6_DMR	20329151	20330000	1	.	850	.
chr1	.	wtEM_EN_g6d3n6_DMR	20333001	20333200	1	.	200	.
chr1	.	wtEM_EN_g6d3n6_DMR	20336701	20337300	1	.	600	.
chr1	.	wtEM_EN_g6d3n6_DMR	20362901	20363000	1	.	100	.
chr1	.	wtEM_EN_g6d3n6_DMR	20371001	20371200	1	.	200	.
chr1	.	wtEM_EN_g6d3n6_DMR	20373851	20374150	1	.	300	.
chr1	.	wtEM_EN_g6d3n6_DMR	20403251	20403500	1	.	250	.
chr1	.	wtEM_EN_g6d3n6_DMR	20407151	20407250	1	.	100	.
chr1	.	wtEM_EN_g6d3n6_DMR	20435851	20435950	1	.	100	.
chr1	.	wtEM_EN_g6d3n6_DMR	20441451	20441650	1	.	200	.
chr1	.	wtEM_EN_g6d3n6_DMR	20471151	20471450	1	.	300	.
chr1	.	wtEM_EN_g6d3n6_DMR	20473751	20474100	1	.	350	.
chr1	.	wtEM_EN_g6d3n6_DMR	20492501	20492850	1	.	350	.
chr1	.	wtEM_EN_g6d3n6_DMR	20493401	20493550	1	.	150	.
chr1	.	wtEM_EN_g6d3n6_DMR	20496151	20496500	1	.	350	.
chr1	.	wtEM_EN_g6d3n6_DMR	20502301	20502900	1	.	600	.
chr1	.	wtEM_EN_g6d3n6_DMR	20512501	20512850	1	.	350	.
chr1	.	wtEM_EN_g6d3n6_DMR	20513851	20513950	1	.	100	.
chr1	.	wtEM_EN_g6d3n6_DMR	20527601	20527700	1	.	100	.
chr1	.	wtEM_EN_g6d3n6_DMR	20528651	20529150	1	.	500	.
chr1	.	wtEM_EN_g6d3n6_DMR	20544501	20544650	1	.	150	.
chr1	.	wtEM_EN_g6d3n6_DMR	20572801	20573000	1	.	200	.
chr1	.	wtEM_EN_g6d3n6_DMR	20632101	20632200	1	.	100	.
chr1	.	wtEM_EN_g6d3n6_DMR	20688601	20689350	1	.	750	.
chr1	.	wtEM_EN_g6d3n6_DMR	20690601	20691150	1	.	550	.
chr1	.	wtEM_EN_g6d3n6_DMR	20700701	20700950	1	.	250	.
chr1	.	wtEM_EN_g6d3n6_DMR	20714601	20714850	1	.	250	.
chr1	.	wtEM_EN_g6d3n6_DMR	20728301	20728450	1	.	150	.
chr1	.	wtEM_EN_g6d3n6_DMR	20737751	20737850	1	.	100	.
chr1	.	wtEM_EN_g6d3n6_DMR	20780951	20781350	1	.	400	.
chr1	.	wtEM_EN_g6d3n6_DMR	20798901	20799250	1	.	350	.
chr1	.	wtEM_EN_g6d3n6_DMR	20799751	20800150	1	.	400	.
chr1	.	wtEM_EN_g6d3n6_DMR	20803151	20803550	1	.	400	.
chr1	.	wtEM_EN_g6d3n6_DMR	20828201	20828400	1	.	200	.
chr1	.	wtEM_EN_g6d3n6_DMR	20829801	20829950	1	.	150	.
chr1	.	wtEM_EN_g6d3n6_DMR	20830601	20830700	1	.	100	.
chr1	.	wtEM_EN_g6d3n6_DMR	20865901	20866050	1	.	150	.
chr1	.	wtEM_EN_g6d3n6_DMR	20918201	20918350	1	.	150	.
chr1	.	wtEM_EN_g6d3n6_DMR	20929601	20931100	1	.	1500	.
chr1	.	wtEM_EN_g6d3n6_DMR	20973251	20973350	1	.	100	.
chr1	.	wtEM_EN_g6d3n6_DMR	20977551	20977850	1	.	300	.
chr1	.	wtEM_EN_g6d3n6_DMR	20983451	20984400	1	.	950	.
chr1	.	wtEM_EN_g6d3n6_DMR	20986101	20986400	1	.	300	.
chr1	.	wtEM_EN_g6d3n6_DMR	21009801	21009900	1	.	100	.
chr1	.	wtEM_EN_g6d3n6_DMR	21022401	21022750	1	.	350	.
chr1	.	wtEM_EN_g6d3n6_DMR	21037701	21037800	1	.	100	.
chr1	.	wtEM_EN_g6d3n6_DMR	21038201	21038500	1	.	300	.
chr1	.	wtEM_EN_g6d3n6_DMR	21046251	21046550	1	.	300	.
chr1	.	wtEM_EN_g6d3n6_DMR	21058751	21058950	1	.	200	.
chr1	.	wtEM_EN_g6d3n6_DMR	21069901	21070300	1	.	400	.
chr1	.	wtEM_EN_g6d3n6_DMR	21084401	21084950	1	.	550	.
chr1	.	wtEM_EN_g6d3n6_DMR	21108701	21108800	1	.	100	.
chr1	.	wtEM_EN_g6d3n6_DMR	21110801	21110900	1	.	100	.
chr1	.	wtEM_EN_g6d3n6_DMR	21118401	21118650	1	.	250	.
chr1	.	wtEM_EN_g6d3n6_DMR	21126451	21126650	1	.	200	.
chr1	.	wtEM_EN_g6d3n6_DMR	21148901	21149550	1	.	650	.
chr1	.	wtEM_EN_g6d3n6_DMR	21183651	21183800	1	.	150	.
chr1	.	wtEM_EN_g6d3n6_DMR	21184151	21184550	1	.	400	.
chr1	.	wtEM_EN_g6d3n6_DMR	21192501	21192600	1	.	100	.
chr1	.	wtEM_EN_g6d3n6_DMR	21201251	21201450	1	.	200	.
chr1	.	wtEM_EN_g6d3n6_DMR	21214201	21214600	1	.	400	.
chr1	.	wtEM_EN_g6d3n6_DMR	21216301	21216650	1	.	350	.
chr1	.	wtEM_EN_g6d3n6_DMR	21219351	21220500	1	.	1150	.
chr1	.	wtEM_EN_g6d3n6_DMR	21221501	21221800	1	.	300	.
chr1	.	wtEM_EN_g6d3n6_DMR	21232551	21232750	1	.	200	.
chr1	.	wtEM_EN_g6d3n6_DMR	21240901	21241000	1	.	100	.
chr1	.	wtEM_EN_g6d3n6_DMR	21253601	21253850	1	.	250	.
chr1	.	wtEM_EN_g6d3n6_DMR	21338951	21339150	1	.	200	.
chr1	.	wtEM_EN_g6d3n6_DMR	21345251	21345400	1	.	150	.
chr1	.	wtEM_EN_g6d3n6_DMR	21357051	21357150	1	.	100	.
chr1	.	wtEM_EN_g6d3n6_DMR	21372351	21373000	1	.	650	.
chr1	.	wtEM_EN_g6d3n6_DMR	21375851	21376050	1	.	200	.
chr1	.	wtEM_EN_g6d3n6_DMR	21378051	21378250	1	.	200	.
chr1	.	wtEM_EN_g6d3n6_DMR	21392851	21393000	1	.	150	.
chr1	.	wtEM_EN_g6d3n6_DMR	21393751	21393950	1	.	200	.
chr1	.	wtEM_EN_g6d3n6_DMR	21394451	21395300	1	.	850	.
chr1	.	wtEM_EN_g6d3n6_DMR	21396101	21396450	1	.	350	.
chr1	.	wtEM_EN_g6d3n6_DMR	21402101	21402300	1	.	200	.
chr1	.	wtEM_EN_g6d3n6_DMR	21402901	21403000	1	.	100	.
chr1	.	wtEM_EN_g6d3n6_DMR	21403501	21403800	1	.	300	.
chr1	.	wtEM_EN_g6d3n6_DMR	21405151	21405750	1	.	600	.
chr1	.	wtEM_EN_g6d3n6_DMR	21475401	21475800	1	.	400	.
chr1	.	wtEM_EN_g6d3n6_DMR	21486251	21486650	1	.	400	.
chr1	.	wtEM_EN_g6d3n6_DMR	21493151	21493400	1	.	250	.
chr1	.	wtEM_EN_g6d3n6_DMR	21513201	21513500	1	.	300	.
chr1	.	wtEM_EN_g6d3n6_DMR	21522101	21522250	1	.	150	.
chr1	.	wtEM_EN_g6d3n6_DMR	21585301	21585600	1	.	300	.
chr1	.	wtEM_EN_g6d3n6_DMR	21587101	21587550	1	.	450	.
chr1	.	wtEM_EN_g6d3n6_DMR	21587951	21588250	1	.	300	.
chr1	.	wtEM_EN_g6d3n6_DMR	21589251	21589450	1	.	200	.
chr1	.	wtEM_EN_g6d3n6_DMR	21589851	21590000	1	.	150	.
chr1	.	wtEM_EN_g6d3n6_DMR	21605851	21606650	1	.	800	.
chr1	.	wtEM_EN_g6d3n6_DMR	21611551	21612550	1	.	1000	.
chr1	.	wtEM_EN_g6d3n6_DMR	21613001	21613400	1	.	400	.
chr1	.	wtEM_EN_g6d3n6_DMR	21614101	21615000	1	.	900	.
chr1	.	wtEM_EN_g6d3n6_DMR	21636401	21636850	1	.	450	.
chr1	.	wtEM_EN_g6d3n6_DMR	21639351	21639450	1	.	100	.
chr1	.	wtEM_EN_g6d3n6_DMR	21668601	21668800	1	.	200	.
chr1	.	wtEM_EN_g6d3n6_DMR	21678851	21679400	1	.	550	.
chr1	.	wtEM_EN_g6d3n6_DMR	21685601	21687100	1	.	1500	.
chr1	.	wtEM_EN_g6d3n6_DMR	21713151	21713250	1	.	100	.
chr1	.	wtEM_EN_g6d3n6_DMR	21733401	21733800	1	.	400	.
chr1	.	wtEM_EN_g6d3n6_DMR	21734801	21734900	1	.	100	.
chr1	.	wtEM_EN_g6d3n6_DMR	21735301	21735900	1	.	600	.
chr1	.	wtEM_EN_g6d3n6_DMR	21745251	21746250	1	.	1000	.
chr1	.	wtEM_EN_g6d3n6_DMR	21748001	21748600	1	.	600	.
chr1	.	wtEM_EN_g6d3n6_DMR	21757651	21757850	1	.	200	.
chr1	.	wtEM_EN_g6d3n6_DMR	21759301	21759950	1	.	650	.
chr1	.	wtEM_EN_g6d3n6_DMR	21761451	21761900	1	.	450	.
chr1	.	wtEM_EN_g6d3n6_DMR	21762801	21763050	1	.	250	.
chr1	.	wtEM_EN_g6d3n6_DMR	21781701	21781800	1	.	100	.
chr1	.	wtEM_EN_g6d3n6_DMR	21783001	21783300	1	.	300	.
chr1	.	wtEM_EN_g6d3n6_DMR	21788551	21789200	1	.	650	.
chr1	.	wtEM_EN_g6d3n6_DMR	21793251	21793400	1	.	150	.
chr1	.	wtEM_EN_g6d3n6_DMR	21794551	21794850	1	.	300	.
chr1	.	wtEM_EN_g6d3n6_DMR	21813701	21813800	1	.	100	.
chr1	.	wtEM_EN_g6d3n6_DMR	21817701	21818100	1	.	400	.
chr1	.	wtEM_EN_g6d3n6_DMR	21829251	21829650	1	.	400	.
chr1	.	wtEM_EN_g6d3n6_DMR	21830801	21831100	1	.	300	.
chr1	.	wtEM_EN_g6d3n6_DMR	21842751	21842850	1	.	100	.
chr1	.	wtEM_EN_g6d3n6_DMR	21848401	21848650	1	.	250	.
chr1	.	wtEM_EN_g6d3n6_DMR	21849451	21849600	1	.	150	.
chr1	.	wtEM_EN_g6d3n6_DMR	21857351	21857450	1	.	100	.
chr1	.	wtEM_EN_g6d3n6_DMR	21861451	21862650	1	.	1200	.
chr1	.	wtEM_EN_g6d3n6_DMR	21875751	21875850	1	.	100	.
chr1	.	wtEM_EN_g6d3n6_DMR	21876651	21877600	1	.	950	.
chr1	.	wtEM_EN_g6d3n6_DMR	21883951	21884150	1	.	200	.
chr1	.	wtEM_EN_g6d3n6_DMR	21922601	21922700	1	.	100	.
chr1	.	wtEM_EN_g6d3n6_DMR	21961401	21961700	1	.	300	.
chr1	.	wtEM_EN_g6d3n6_DMR	21996251	21996550	1	.	300	.
chr1	.	wtEM_EN_g6d3n6_DMR	21999751	21999950	1	.	200	.
chr1	.	wtEM_EN_g6d3n6_DMR	22046701	22047050	1	.	350	.
chr1	.	wtEM_EN_g6d3n6_DMR	22048351	22049600	1	.	1250	.
chr1	.	wtEM_EN_g6d3n6_DMR	22050101	22050600	1	.	500	.
chr1	.	wtEM_EN_g6d3n6_DMR	22051101	22051600	1	.	500	.
chr1	.	wtEM_EN_g6d3n6_DMR	22063051	22065450	1	.	2400	.
chr1	.	wtEM_EN_g6d3n6_DMR	22088651	22089100	1	.	450	.
chr1	.	wtEM_EN_g6d3n6_DMR	22109301	22109900	1	.	600	.
chr1	.	wtEM_EN_g6d3n6_DMR	22110951	22111300	1	.	350	.
chr1	.	wtEM_EN_g6d3n6_DMR	22116301	22116600	1	.	300	.
chr1	.	wtEM_EN_g6d3n6_DMR	22129351	22129650	1	.	300	.
chr1	.	wtEM_EN_g6d3n6_DMR	22158601	22158700	1	.	100	.
chr1	.	wtEM_EN_g6d3n6_DMR	22164451	22164550	1	.	100	.
chr1	.	wtEM_EN_g6d3n6_DMR	22166101	22166450	1	.	350	.
chr1	.	wtEM_EN_g6d3n6_DMR	22167501	22167850	1	.	350	.
chr1	.	wtEM_EN_g6d3n6_DMR	22192651	22192750	1	.	100	.
chr1	.	wtEM_EN_g6d3n6_DMR	22271451	22271550	1	.	100	.
chr1	.	wtEM_EN_g6d3n6_DMR	22273301	22273700	1	.	400	.
chr1	.	wtEM_EN_g6d3n6_DMR	22373751	22373900	1	.	150	.
chr1	.	wtEM_EN_g6d3n6_DMR	22384301	22384400	1	.	100	.
chr1	.	wtEM_EN_g6d3n6_DMR	22451151	22451250	1	.	100	.
chr1	.	wtEM_EN_g6d3n6_DMR	22459451	22459900	1	.	450	.
chr1	.	wtEM_EN_g6d3n6_DMR	22461451	22461550	1	.	100	.
chr1	.	wtEM_EN_g6d3n6_DMR	22463301	22463400	1	.	100	.
chr1	.	wtEM_EN_g6d3n6_DMR	22486351	22486750	1	.	400	.
chr1	.	wtEM_EN_g6d3n6_DMR	22524851	22525400	1	.	550	.
chr1	.	wtEM_EN_g6d3n6_DMR	22541851	22542000	1	.	150	.
chr1	.	wtEM_EN_g6d3n6_DMR	22547001	22547250	1	.	250	.
chr1	.	wtEM_EN_g6d3n6_DMR	22566351	22567300	1	.	950	.
chr1	.	wtEM_EN_g6d3n6_DMR	22572851	22573000	1	.	150	.
chr1	.	wtEM_EN_g6d3n6_DMR	22621951	22622100	1	.	150	.
chr1	.	wtEM_EN_g6d3n6_DMR	22630901	22631050	1	.	150	.
chr1	.	wtEM_EN_g6d3n6_DMR	22650101	22650250	1	.	150	.
chr1	.	wtEM_EN_g6d3n6_DMR	22650601	22651550	1	.	950	.
chr1	.	wtEM_EN_g6d3n6_DMR	22659401	22659550	1	.	150	.
chr1	.	wtEM_EN_g6d3n6_DMR	22684301	22684400	1	.	100	.
chr1	.	wtEM_EN_g6d3n6_DMR	22746901	22747100	1	.	200	.
chr1	.	wtEM_EN_g6d3n6_DMR	22755351	22755500	1	.	150	.
chr1	.	wtEM_EN_g6d3n6_DMR	22781101	22781300	1	.	200	.
chr1	.	wtEM_EN_g6d3n6_DMR	22781951	22782350	1	.	400	.
chr1	.	wtEM_EN_g6d3n6_DMR	22783401	22784100	1	.	700	.
chr1	.	wtEM_EN_g6d3n6_DMR	22832651	22832950	1	.	300	.
chr1	.	wtEM_EN_g6d3n6_DMR	22834451	22834550	1	.	100	.
chr1	.	wtEM_EN_g6d3n6_DMR	22849151	22849650	1	.	500	.
chr1	.	wtEM_EN_g6d3n6_DMR	22853951	22854050	1	.	100	.
chr1	.	wtEM_EN_g6d3n6_DMR	22855201	22855650	1	.	450	.
chr1	.	wtEM_EN_g6d3n6_DMR	22858201	22858950	1	.	750	.
chr1	.	wtEM_EN_g6d3n6_DMR	22876051	22876350	1	.	300	.
chr1	.	wtEM_EN_g6d3n6_DMR	22891751	22891950	1	.	200	.
chr1	.	wtEM_EN_g6d3n6_DMR	22892751	22893350	1	.	600	.
chr1	.	wtEM_EN_g6d3n6_DMR	22915601	22915700	1	.	100	.
chr1	.	wtEM_EN_g6d3n6_DMR	22926001	22926100	1	.	100	.
chr1	.	wtEM_EN_g6d3n6_DMR	22988701	22988800	1	.	100	.
chr1	.	wtEM_EN_g6d3n6_DMR	22989301	22989400	1	.	100	.
chr1	.	wtEM_EN_g6d3n6_DMR	23024851	23024950	1	.	100	.
chr1	.	wtEM_EN_g6d3n6_DMR	23100751	23101000	1	.	250	.
chr1	.	wtEM_EN_g6d3n6_DMR	23153051	23153600	1	.	550	.
chr1	.	wtEM_EN_g6d3n6_DMR	23156251	23156950	1	.	700	.
chr1	.	wtEM_EN_g6d3n6_DMR	23160801	23161050	1	.	250	.
chr1	.	wtEM_EN_g6d3n6_DMR	23168551	23168850	1	.	300	.
chr1	.	wtEM_EN_g6d3n6_DMR	23178201	23178700	1	.	500	.
chr1	.	wtEM_EN_g6d3n6_DMR	23250701	23250950	1	.	250	.
chr1	.	wtEM_EN_g6d3n6_DMR	23279551	23279750	1	.	200	.
chr1	.	wtEM_EN_g6d3n6_DMR	23284151	23284300	1	.	150	.
chr1	.	wtEM_EN_g6d3n6_DMR	23299451	23299950	1	.	500	.
chr1	.	wtEM_EN_g6d3n6_DMR	23309701	23309800	1	.	100	.
chr1	.	wtEM_EN_g6d3n6_DMR	23366801	23367400	1	.	600	.
chr1	.	wtEM_EN_g6d3n6_DMR	23380151	23380350	1	.	200	.
chr1	.	wtEM_EN_g6d3n6_DMR	23428151	23428650	1	.	500	.
chr1	.	wtEM_EN_g6d3n6_DMR	23439051	23439800	1	.	750	.
chr1	.	wtEM_EN_g6d3n6_DMR	23480801	23480950	1	.	150	.
chr1	.	wtEM_EN_g6d3n6_DMR	23495201	23495650	1	.	450	.
chr1	.	wtEM_EN_g6d3n6_DMR	23496301	23496400	1	.	100	.
chr1	.	wtEM_EN_g6d3n6_DMR	23513751	23514200	1	.	450	.
chr1	.	wtEM_EN_g6d3n6_DMR	23617351	23617650	1	.	300	.
chr1	.	wtEM_EN_g6d3n6_DMR	23619451	23619700	1	.	250	.
chr1	.	wtEM_EN_g6d3n6_DMR	23752701	23752900	1	.	200	.
chr1	.	wtEM_EN_g6d3n6_DMR	23857251	23857550	1	.	300	.
chr1	.	wtEM_EN_g6d3n6_DMR	23859901	23860250	1	.	350	.
chr1	.	wtEM_EN_g6d3n6_DMR	23865551	23866000	1	.	450	.
chr1	.	wtEM_EN_g6d3n6_DMR	23887751	23887850	1	.	100	.
chr1	.	wtEM_EN_g6d3n6_DMR	23929651	23930850	1	.	1200	.
chr1	.	wtEM_EN_g6d3n6_DMR	23934751	23935400	1	.	650	.
chr1	.	wtEM_EN_g6d3n6_DMR	23935751	23936300	1	.	550	.
chr1	.	wtEM_EN_g6d3n6_DMR	23937951	23938150	1	.	200	.
chr1	.	wtEM_EN_g6d3n6_DMR	23969151	23970050	1	.	900	.
chr1	.	wtEM_EN_g6d3n6_DMR	24042901	24043250	1	.	350	.
chr1	.	wtEM_EN_g6d3n6_DMR	24045551	24045650	1	.	100	.
chr1	.	wtEM_EN_g6d3n6_DMR	24092701	24092800	1	.	100	.
chr1	.	wtEM_EN_g6d3n6_DMR	24105201	24105300	1	.	100	.
chr1	.	wtEM_EN_g6d3n6_DMR	24108351	24108700	1	.	350	.
chr1	.	wtEM_EN_g6d3n6_DMR	24123151	24123450	1	.	300	.
chr1	.	wtEM_EN_g6d3n6_DMR	24129751	24129850	1	.	100	.
chr1	.	wtEM_EN_g6d3n6_DMR	24148151	24148300	1	.	150	.
chr1	.	wtEM_EN_g6d3n6_DMR	24226901	24227200	1	.	300	.
chr1	.	wtEM_EN_g6d3n6_DMR	24236401	24236750	1	.	350	.
chr1	.	wtEM_EN_g6d3n6_DMR	24244801	24245300	1	.	500	.
chr1	.	wtEM_EN_g6d3n6_DMR	24268601	24269000	1	.	400	.
chr1	.	wtEM_EN_g6d3n6_DMR	24291451	24291850	1	.	400	.
chr1	.	wtEM_EN_g6d3n6_DMR	24295301	24295500	1	.	200	.
chr1	.	wtEM_EN_g6d3n6_DMR	24298451	24298550	1	.	100	.
chr1	.	wtEM_EN_g6d3n6_DMR	24308151	24308250	1	.	100	.
chr1	.	wtEM_EN_g6d3n6_DMR	24321001	24321200	1	.	200	.
chr1	.	wtEM_EN_g6d3n6_DMR	24331601	24331700	1	.	100	.
chr1	.	wtEM_EN_g6d3n6_DMR	24354551	24354950	1	.	400	.
chr1	.	wtEM_EN_g6d3n6_DMR	24357751	24357900	1	.	150	.
chr1	.	wtEM_EN_g6d3n6_DMR	24364351	24364450	1	.	100	.
chr1	.	wtEM_EN_g6d3n6_DMR	24368501	24368700	1	.	200	.
chr1	.	wtEM_EN_g6d3n6_DMR	24373101	24373200	1	.	100	.
chr1	.	wtEM_EN_g6d3n6_DMR	24375351	24375500	1	.	150	.
chr1	.	wtEM_EN_g6d3n6_DMR	24388351	24388750	1	.	400	.
chr1	.	wtEM_EN_g6d3n6_DMR	24413351	24413450	1	.	100	.
chr1	.	wtEM_EN_g6d3n6_DMR	24458351	24458800	1	.	450	.
chr1	.	wtEM_EN_g6d3n6_DMR	24459951	24460050	1	.	100	.
chr1	.	wtEM_EN_g6d3n6_DMR	24491851	24492100	1	.	250	.
chr1	.	wtEM_EN_g6d3n6_DMR	24495551	24495650	1	.	100	.
chr1	.	wtEM_EN_g6d3n6_DMR	24537651	24537800	1	.	150	.
chr1	.	wtEM_EN_g6d3n6_DMR	24557551	24557800	1	.	250	.
chr1	.	wtEM_EN_g6d3n6_DMR	24568201	24568300	1	.	100	.
chr1	.	wtEM_EN_g6d3n6_DMR	24568701	24569000	1	.	300	.
chr1	.	wtEM_EN_g6d3n6_DMR	24579351	24579700	1	.	350	.
chr1	.	wtEM_EN_g6d3n6_DMR	24649301	24649450	1	.	150	.
chr1	.	wtEM_EN_g6d3n6_DMR	24687301	24687600	1	.	300	.
chr1	.	wtEM_EN_g6d3n6_DMR	24695651	24695750	1	.	100	.
chr1	.	wtEM_EN_g6d3n6_DMR	24735051	24735350	1	.	300	.
chr1	.	wtEM_EN_g6d3n6_DMR	24736801	24736950	1	.	150	.
chr1	.	wtEM_EN_g6d3n6_DMR	24740001	24740250	1	.	250	.
chr1	.	wtEM_EN_g6d3n6_DMR	24835701	24835950	1	.	250	.
chr1	.	wtEM_EN_g6d3n6_DMR	24839001	24839100	1	.	100	.
chr1	.	wtEM_EN_g6d3n6_DMR	24897701	24897800	1	.	100	.
chr1	.	wtEM_EN_g6d3n6_DMR	24899601	24899800	1	.	200	.
chr1	.	wtEM_EN_g6d3n6_DMR	24901151	24901500	1	.	350	.
chr1	.	wtEM_EN_g6d3n6_DMR	24911401	24911900	1	.	500	.
chr1	.	wtEM_EN_g6d3n6_DMR	24960001	24960400	1	.	400	.
chr1	.	wtEM_EN_g6d3n6_DMR	25009401	25009500	1	.	100	.
chr1	.	wtEM_EN_g6d3n6_DMR	25101901	25102250	1	.	350	.
chr1	.	wtEM_EN_g6d3n6_DMR	25152751	25153150	1	.	400	.
chr1	.	wtEM_EN_g6d3n6_DMR	25183951	25184150	1	.	200	.
chr1	.	wtEM_EN_g6d3n6_DMR	25184651	25184750	1	.	100	.
chr1	.	wtEM_EN_g6d3n6_DMR	25185301	25185400	1	.	100	.
chr1	.	wtEM_EN_g6d3n6_DMR	25191451	25191700	1	.	250	.
chr1	.	wtEM_EN_g6d3n6_DMR	25202051	25202500	1	.	450	.
chr1	.	wtEM_EN_g6d3n6_DMR	25250651	25250750	1	.	100	.
chr1	.	wtEM_EN_g6d3n6_DMR	25269751	25270350	1	.	600	.
chr1	.	wtEM_EN_g6d3n6_DMR	25333051	25333350	1	.	300	.
chr1	.	wtEM_EN_g6d3n6_DMR	25335751	25335900	1	.	150	.
chr1	.	wtEM_EN_g6d3n6_DMR	25336251	25336350	1	.	100	.
chr1	.	wtEM_EN_g6d3n6_DMR	25352701	25353800	1	.	1100	.
chr1	.	wtEM_EN_g6d3n6_DMR	25361601	25361750	1	.	150	.
chr1	.	wtEM_EN_g6d3n6_DMR	25373301	25373400	1	.	100	.
chr1	.	wtEM_EN_g6d3n6_DMR	25404151	25404750	1	.	600	.
chr1	.	wtEM_EN_g6d3n6_DMR	25424801	25424950	1	.	150	.
chr1	.	wtEM_EN_g6d3n6_DMR	25440051	25440150	1	.	100	.
chr1	.	wtEM_EN_g6d3n6_DMR	25460251	25460400	1	.	150	.
chr1	.	wtEM_EN_g6d3n6_DMR	25463551	25463650	1	.	100	.
chr1	.	wtEM_EN_g6d3n6_DMR	25482101	25482300	1	.	200	.
chr1	.	wtEM_EN_g6d3n6_DMR	25516351	25516550	1	.	200	.
chr1	.	wtEM_EN_g6d3n6_DMR	25550351	25550450	1	.	100	.
chr1	.	wtEM_EN_g6d3n6_DMR	25569751	25570150	1	.	400	.
chr1	.	wtEM_EN_g6d3n6_DMR	25597851	25598250	1	.	400	.
chr1	.	wtEM_EN_g6d3n6_DMR	25599001	25599300	1	.	300	.
chr1	.	wtEM_EN_g6d3n6_DMR	25601651	25602050	1	.	400	.
chr1	.	wtEM_EN_g6d3n6_DMR	25617001	25617250	1	.	250	.
chr1	.	wtEM_EN_g6d3n6_DMR	25643601	25644650	1	.	1050	.
chr1	.	wtEM_EN_g6d3n6_DMR	25645001	25645200	1	.	200	.
chr1	.	wtEM_EN_g6d3n6_DMR	25654551	25654650	1	.	100	.
chr1	.	wtEM_EN_g6d3n6_DMR	25733901	25734000	1	.	100	.
chr1	.	wtEM_EN_g6d3n6_DMR	25754501	25755600	1	.	1100	.
chr1	.	wtEM_EN_g6d3n6_DMR	25877351	25877850	1	.	500	.
chr1	.	wtEM_EN_g6d3n6_DMR	25910051	25910150	1	.	100	.
chr1	.	wtEM_EN_g6d3n6_DMR	25921001	25921100	1	.	100	.
chr1	.	wtEM_EN_g6d3n6_DMR	25931901	25932450	1	.	550	.
chr1	.	wtEM_EN_g6d3n6_DMR	25938901	25939000	1	.	100	.
chr1	.	wtEM_EN_g6d3n6_DMR	25940351	25940550	1	.	200	.
chr1	.	wtEM_EN_g6d3n6_DMR	25975501	25975750	1	.	250	.
chr1	.	wtEM_EN_g6d3n6_DMR	25979851	25980350	1	.	500	.
chr1	.	wtEM_EN_g6d3n6_DMR	26034601	26034800	1	.	200	.
chr1	.	wtEM_EN_g6d3n6_DMR	26085851	26085950	1	.	100	.
chr1	.	wtEM_EN_g6d3n6_DMR	26087751	26087850	1	.	100	.
chr1	.	wtEM_EN_g6d3n6_DMR	26114701	26114900	1	.	200	.
chr1	.	wtEM_EN_g6d3n6_DMR	26181151	26181350	1	.	200	.
chr1	.	wtEM_EN_g6d3n6_DMR	26183401	26183550	1	.	150	.
chr1	.	wtEM_EN_g6d3n6_DMR	26200601	26200700	1	.	100	.
chr1	.	wtEM_EN_g6d3n6_DMR	26253901	26254100	1	.	200	.
chr1	.	wtEM_EN_g6d3n6_DMR	26255801	26255900	1	.	100	.
chr1	.	wtEM_EN_g6d3n6_DMR	26271701	26271800	1	.	100	.
chr1	.	wtEM_EN_g6d3n6_DMR	26293451	26293700	1	.	250	.
chr1	.	wtEM_EN_g6d3n6_DMR	26378201	26379300	1	.	1100	.
chr1	.	wtEM_EN_g6d3n6_DMR	26395601	26396200	1	.	600	.
chr1	.	wtEM_EN_g6d3n6_DMR	26429501	26429600	1	.	100	.
chr1	.	wtEM_EN_g6d3n6_DMR	26482501	26482650	1	.	150	.
chr1	.	wtEM_EN_g6d3n6_DMR	26564901	26565000	1	.	100	.
chr1	.	wtEM_EN_g6d3n6_DMR	26607901	26608050	1	.	150	.
chr1	.	wtEM_EN_g6d3n6_DMR	26654451	26654550	1	.	100	.
chr1	.	wtEM_EN_g6d3n6_DMR	26681601	26681700	1	.	100	.
chr1	.	wtEM_EN_g6d3n6_DMR	26714801	26715050	1	.	250	.
chr1	.	wtEM_EN_g6d3n6_DMR	26725901	26726200	1	.	300	.
chr1	.	wtEM_EN_g6d3n6_DMR	26783301	26783550	1	.	250	.
chr1	.	wtEM_EN_g6d3n6_DMR	26806151	26806250	1	.	100	.
chr1	.	wtEM_EN_g6d3n6_DMR	26811401	26811500	1	.	100	.
chr1	.	wtEM_EN_g6d3n6_DMR	26885151	26885450	1	.	300	.
chr1	.	wtEM_EN_g6d3n6_DMR	26887101	26887450	1	.	350	.
chr1	.	wtEM_EN_g6d3n6_DMR	26971951	26972250	1	.	300	.
chr1	.	wtEM_EN_g6d3n6_DMR	26973401	26973750	1	.	350	.
chr1	.	wtEM_EN_g6d3n6_DMR	27009751	27009950	1	.	200	.
chr1	.	wtEM_EN_g6d3n6_DMR	27039251	27039600	1	.	350	.
chr1	.	wtEM_EN_g6d3n6_DMR	27105001	27105100	1	.	100	.
chr1	.	wtEM_EN_g6d3n6_DMR	27105501	27105700	1	.	200	.
chr1	.	wtEM_EN_g6d3n6_DMR	27324501	27324650	1	.	150	.
chr1	.	wtEM_EN_g6d3n6_DMR	27395001	27395100	1	.	100	.
chr1	.	wtEM_EN_g6d3n6_DMR	27432951	27433050	1	.	100	.
chr1	.	wtEM_EN_g6d3n6_DMR	27478301	27478600	1	.	300	.
chr1	.	wtEM_EN_g6d3n6_DMR	27498501	27498600	1	.	100	.
chr1	.	wtEM_EN_g6d3n6_DMR	27611401	27611500	1	.	100	.
chr1	.	wtEM_EN_g6d3n6_DMR	27619751	27619850	1	.	100	.
chr1	.	wtEM_EN_g6d3n6_DMR	27625401	27625650	1	.	250	.
chr1	.	wtEM_EN_g6d3n6_DMR	27640901	27641300	1	.	400	.
chr1	.	wtEM_EN_g6d3n6_DMR	27678901	27679100	1	.	200	.
chr1	.	wtEM_EN_g6d3n6_DMR	27681051	27681150	1	.	100	.
chr1	.	wtEM_EN_g6d3n6_DMR	27698001	27698200	1	.	200	.
chr1	.	wtEM_EN_g6d3n6_DMR	27786301	27786600	1	.	300	.
chr1	.	wtEM_EN_g6d3n6_DMR	27787551	27787800	1	.	250	.
chr1	.	wtEM_EN_g6d3n6_DMR	27824401	27824500	1	.	100	.
chr1	.	wtEM_EN_g6d3n6_DMR	27847901	27848100	1	.	200	.
chr1	.	wtEM_EN_g6d3n6_DMR	27936201	27936550	1	.	350	.
chr1	.	wtEM_EN_g6d3n6_DMR	27953851	27953950	1	.	100	.
chr1	.	wtEM_EN_g6d3n6_DMR	28041651	28041750	1	.	100	.
chr1	.	wtEM_EN_g6d3n6_DMR	28109151	28109350	1	.	200	.
chr1	.	wtEM_EN_g6d3n6_DMR	28140551	28140950	1	.	400	.
chr1	.	wtEM_EN_g6d3n6_DMR	28144751	28144900	1	.	150	.
chr1	.	wtEM_EN_g6d3n6_DMR	28170801	28171800	1	.	1000	.
chr1	.	wtEM_EN_g6d3n6_DMR	28263001	28263150	1	.	150	.
chr1	.	wtEM_EN_g6d3n6_DMR	28283851	28284150	1	.	300	.
chr1	.	wtEM_EN_g6d3n6_DMR	28297001	28297100	1	.	100	.
chr1	.	wtEM_EN_g6d3n6_DMR	28315751	28315850	1	.	100	.
chr1	.	wtEM_EN_g6d3n6_DMR	28335601	28336200	1	.	600	.
chr1	.	wtEM_EN_g6d3n6_DMR	28401451	28401900	1	.	450	.
chr1	.	wtEM_EN_g6d3n6_DMR	28416351	28416450	1	.	100	.
chr1	.	wtEM_EN_g6d3n6_DMR	28518701	28518900	1	.	200	.
chr1	.	wtEM_EN_g6d3n6_DMR	28526001	28526300	1	.	300	.
chr1	.	wtEM_EN_g6d3n6_DMR	28597601	28597850	1	.	250	.
chr1	.	wtEM_EN_g6d3n6_DMR	28657051	28657250	1	.	200	.
chr1	.	wtEM_EN_g6d3n6_DMR	28708001	28708300	1	.	300	.
chr1	.	wtEM_EN_g6d3n6_DMR	28711801	28712200	1	.	400	.
chr1	.	wtEM_EN_g6d3n6_DMR	28754801	28755250	1	.	450	.
chr1	.	wtEM_EN_g6d3n6_DMR	28820701	28820800	1	.	100	.
chr1	.	wtEM_EN_g6d3n6_DMR	28825701	28825800	1	.	100	.
chr1	.	wtEM_EN_g6d3n6_DMR	28836401	28836750	1	.	350	.
chr1	.	wtEM_EN_g6d3n6_DMR	28869501	28869800	1	.	300	.
chr1	.	wtEM_EN_g6d3n6_DMR	28896401	28896600	1	.	200	.
chr1	.	wtEM_EN_g6d3n6_DMR	28914701	28915100	1	.	400	.
chr1	.	wtEM_EN_g6d3n6_DMR	28917851	28918450	1	.	600	.
chr1	.	wtEM_EN_g6d3n6_DMR	28998751	28999450	1	.	700	.
chr1	.	wtEM_EN_g6d3n6_DMR	29018651	29018750	1	.	100	.
chr1	.	wtEM_EN_g6d3n6_DMR	29019301	29019850	1	.	550	.
chr1	.	wtEM_EN_g6d3n6_DMR	29083451	29083700	1	.	250	.
chr1	.	wtEM_EN_g6d3n6_DMR	29149301	29149400	1	.	100	.
chr1	.	wtEM_EN_g6d3n6_DMR	29174451	29174550	1	.	100	.
chr1	.	wtEM_EN_g6d3n6_DMR	29213401	29213600	1	.	200	.
chr1	.	wtEM_EN_g6d3n6_DMR	29270551	29270650	1	.	100	.
chr1	.	wtEM_EN_g6d3n6_DMR	29317751	29317900	1	.	150	.
chr1	.	wtEM_EN_g6d3n6_DMR	29324301	29324500	1	.	200	.
chr1	.	wtEM_EN_g6d3n6_DMR	29341951	29342050	1	.	100	.
chr1	.	wtEM_EN_g6d3n6_DMR	29382051	29382150	1	.	100	.
chr1	.	wtEM_EN_g6d3n6_DMR	29384651	29385500	1	.	850	.
chr1	.	wtEM_EN_g6d3n6_DMR	29413501	29413900	1	.	400	.
chr1	.	wtEM_EN_g6d3n6_DMR	29477251	29477800	1	.	550	.
chr1	.	wtEM_EN_g6d3n6_DMR	29550001	29550100	1	.	100	.
chr1	.	wtEM_EN_g6d3n6_DMR	29602801	29602950	1	.	150	.
chr1	.	wtEM_EN_g6d3n6_DMR	29659151	29659350	1	.	200	.
chr1	.	wtEM_EN_g6d3n6_DMR	29695801	29695900	1	.	100	.
chr1	.	wtEM_EN_g6d3n6_DMR	29703001	29703400	1	.	400	.
chr1	.	wtEM_EN_g6d3n6_DMR	29704651	29705150	1	.	500	.
chr1	.	wtEM_EN_g6d3n6_DMR	29774051	29774600	1	.	550	.
chr1	.	wtEM_EN_g6d3n6_DMR	29775051	29775300	1	.	250	.
chr1	.	wtEM_EN_g6d3n6_DMR	29779351	29779850	1	.	500	.
chr1	.	wtEM_EN_g6d3n6_DMR	29811451	29811900	1	.	450	.
chr1	.	wtEM_EN_g6d3n6_DMR	29824101	29824300	1	.	200	.
chr1	.	wtEM_EN_g6d3n6_DMR	29845951	29846200	1	.	250	.
chr1	.	wtEM_EN_g6d3n6_DMR	29851301	29851750	1	.	450	.
chr1	.	wtEM_EN_g6d3n6_DMR	29867751	29867900	1	.	150	.
chr1	.	wtEM_EN_g6d3n6_DMR	29945151	29945300	1	.	150	.
chr1	.	wtEM_EN_g6d3n6_DMR	29989301	29989500	1	.	200	.
chr1	.	wtEM_EN_g6d3n6_DMR	30036901	30037050	1	.	150	.
chr1	.	wtEM_EN_g6d3n6_DMR	30092451	30092650	1	.	200	.
chr1	.	wtEM_EN_g6d3n6_DMR	30111701	30111900	1	.	200	.
chr1	.	wtEM_EN_g6d3n6_DMR	30112451	30112850	1	.	400	.
chr1	.	wtEM_EN_g6d3n6_DMR	30290801	30290900	1	.	100	.
chr1	.	wtEM_EN_g6d3n6_DMR	30407151	30407300	1	.	150	.
chr2	.	wtEM_EN_g6d3n6_DMR	98551	98800	1	.	250	.
chr2	.	wtEM_EN_g6d3n6_DMR	144201	144400	1	.	200	.
chr2	.	wtEM_EN_g6d3n6_DMR	152151	152350	1	.	200	.
chr2	.	wtEM_EN_g6d3n6_DMR	153001	153300	1	.	300	.
chr2	.	wtEM_EN_g6d3n6_DMR	176801	177450	1	.	650	.
chr2	.	wtEM_EN_g6d3n6_DMR	179801	179950	1	.	150	.
chr2	.	wtEM_EN_g6d3n6_DMR	187351	187550	1	.	200	.
chr2	.	wtEM_EN_g6d3n6_DMR	202451	202550	1	.	100	.
chr2	.	wtEM_EN_g6d3n6_DMR	204451	204750	1	.	300	.
chr2	.	wtEM_EN_g6d3n6_DMR	205201	205550	1	.	350	.
chr2	.	wtEM_EN_g6d3n6_DMR	207101	207450	1	.	350	.
chr2	.	wtEM_EN_g6d3n6_DMR	210301	210500	1	.	200	.
chr2	.	wtEM_EN_g6d3n6_DMR	216451	216550	1	.	100	.
chr2	.	wtEM_EN_g6d3n6_DMR	238051	238600	1	.	550	.
chr2	.	wtEM_EN_g6d3n6_DMR	266201	266400	1	.	200	.
chr2	.	wtEM_EN_g6d3n6_DMR	267551	267650	1	.	100	.
chr2	.	wtEM_EN_g6d3n6_DMR	276751	277100	1	.	350	.
chr2	.	wtEM_EN_g6d3n6_DMR	287601	287900	1	.	300	.
chr2	.	wtEM_EN_g6d3n6_DMR	305801	306000	1	.	200	.
chr2	.	wtEM_EN_g6d3n6_DMR	312251	312400	1	.	150	.
chr2	.	wtEM_EN_g6d3n6_DMR	314701	315300	1	.	600	.
chr2	.	wtEM_EN_g6d3n6_DMR	324051	324350	1	.	300	.
chr2	.	wtEM_EN_g6d3n6_DMR	326651	326900	1	.	250	.
chr2	.	wtEM_EN_g6d3n6_DMR	331801	331900	1	.	100	.
chr2	.	wtEM_EN_g6d3n6_DMR	340251	340350	1	.	100	.
chr2	.	wtEM_EN_g6d3n6_DMR	350401	350650	1	.	250	.
chr2	.	wtEM_EN_g6d3n6_DMR	356401	356500	1	.	100	.
chr2	.	wtEM_EN_g6d3n6_DMR	362501	362700	1	.	200	.
chr2	.	wtEM_EN_g6d3n6_DMR	368301	368550	1	.	250	.
chr2	.	wtEM_EN_g6d3n6_DMR	379401	379500	1	.	100	.
chr2	.	wtEM_EN_g6d3n6_DMR	390851	391400	1	.	550	.
chr2	.	wtEM_EN_g6d3n6_DMR	394701	394900	1	.	200	.
chr2	.	wtEM_EN_g6d3n6_DMR	424801	425050	1	.	250	.
chr2	.	wtEM_EN_g6d3n6_DMR	438651	438800	1	.	150	.
chr2	.	wtEM_EN_g6d3n6_DMR	440451	440600	1	.	150	.
chr2	.	wtEM_EN_g6d3n6_DMR	448251	448750	1	.	500	.
chr2	.	wtEM_EN_g6d3n6_DMR	449801	450250	1	.	450	.
chr2	.	wtEM_EN_g6d3n6_DMR	455751	456150	1	.	400	.
chr2	.	wtEM_EN_g6d3n6_DMR	463501	463600	1	.	100	.
chr2	.	wtEM_EN_g6d3n6_DMR	481301	481450	1	.	150	.
chr2	.	wtEM_EN_g6d3n6_DMR	486151	486250	1	.	100	.
chr2	.	wtEM_EN_g6d3n6_DMR	492401	492550	1	.	150	.
chr2	.	wtEM_EN_g6d3n6_DMR	532701	532800	1	.	100	.
chr2	.	wtEM_EN_g6d3n6_DMR	553501	553700	1	.	200	.
chr2	.	wtEM_EN_g6d3n6_DMR	560051	560450	1	.	400	.
chr2	.	wtEM_EN_g6d3n6_DMR	566201	566300	1	.	100	.
chr2	.	wtEM_EN_g6d3n6_DMR	569751	569950	1	.	200	.
chr2	.	wtEM_EN_g6d3n6_DMR	571951	572900	1	.	950	.
chr2	.	wtEM_EN_g6d3n6_DMR	583001	583150	1	.	150	.
chr2	.	wtEM_EN_g6d3n6_DMR	588601	588750	1	.	150	.
chr2	.	wtEM_EN_g6d3n6_DMR	601751	603000	1	.	1250	.
chr2	.	wtEM_EN_g6d3n6_DMR	603351	603450	1	.	100	.
chr2	.	wtEM_EN_g6d3n6_DMR	622201	622650	1	.	450	.
chr2	.	wtEM_EN_g6d3n6_DMR	623551	624050	1	.	500	.
chr2	.	wtEM_EN_g6d3n6_DMR	625751	625900	1	.	150	.
chr2	.	wtEM_EN_g6d3n6_DMR	638101	638200	1	.	100	.
chr2	.	wtEM_EN_g6d3n6_DMR	639801	639900	1	.	100	.
chr2	.	wtEM_EN_g6d3n6_DMR	659501	659850	1	.	350	.
chr2	.	wtEM_EN_g6d3n6_DMR	663601	663700	1	.	100	.
chr2	.	wtEM_EN_g6d3n6_DMR	667201	668100	1	.	900	.
chr2	.	wtEM_EN_g6d3n6_DMR	676751	677650	1	.	900	.
chr2	.	wtEM_EN_g6d3n6_DMR	678401	679100	1	.	700	.
chr2	.	wtEM_EN_g6d3n6_DMR	686701	687200	1	.	500	.
chr2	.	wtEM_EN_g6d3n6_DMR	687701	687800	1	.	100	.
chr2	.	wtEM_EN_g6d3n6_DMR	704201	704300	1	.	100	.
chr2	.	wtEM_EN_g6d3n6_DMR	709251	709400	1	.	150	.
chr2	.	wtEM_EN_g6d3n6_DMR	712901	713300	1	.	400	.
chr2	.	wtEM_EN_g6d3n6_DMR	715301	716050	1	.	750	.
chr2	.	wtEM_EN_g6d3n6_DMR	721251	721550	1	.	300	.
chr2	.	wtEM_EN_g6d3n6_DMR	744301	744400	1	.	100	.
chr2	.	wtEM_EN_g6d3n6_DMR	754351	754600	1	.	250	.
chr2	.	wtEM_EN_g6d3n6_DMR	755151	755800	1	.	650	.
chr2	.	wtEM_EN_g6d3n6_DMR	762551	762650	1	.	100	.
chr2	.	wtEM_EN_g6d3n6_DMR	786701	787200	1	.	500	.
chr2	.	wtEM_EN_g6d3n6_DMR	808201	808750	1	.	550	.
chr2	.	wtEM_EN_g6d3n6_DMR	817101	817200	1	.	100	.
chr2	.	wtEM_EN_g6d3n6_DMR	825551	825800	1	.	250	.
chr2	.	wtEM_EN_g6d3n6_DMR	865351	865700	1	.	350	.
chr2	.	wtEM_EN_g6d3n6_DMR	885651	886450	1	.	800	.
chr2	.	wtEM_EN_g6d3n6_DMR	887601	887850	1	.	250	.
chr2	.	wtEM_EN_g6d3n6_DMR	888801	889050	1	.	250	.
chr2	.	wtEM_EN_g6d3n6_DMR	895601	896400	1	.	800	.
chr2	.	wtEM_EN_g6d3n6_DMR	898701	899450	1	.	750	.
chr2	.	wtEM_EN_g6d3n6_DMR	904301	904950	1	.	650	.
chr2	.	wtEM_EN_g6d3n6_DMR	914401	914950	1	.	550	.
chr2	.	wtEM_EN_g6d3n6_DMR	919501	919700	1	.	200	.
chr2	.	wtEM_EN_g6d3n6_DMR	921251	921350	1	.	100	.
chr2	.	wtEM_EN_g6d3n6_DMR	925051	925450	1	.	400	.
chr2	.	wtEM_EN_g6d3n6_DMR	932701	932800	1	.	100	.
chr2	.	wtEM_EN_g6d3n6_DMR	980251	980350	1	.	100	.
chr2	.	wtEM_EN_g6d3n6_DMR	983851	984050	1	.	200	.
chr2	.	wtEM_EN_g6d3n6_DMR	987351	987850	1	.	500	.
chr2	.	wtEM_EN_g6d3n6_DMR	990851	991350	1	.	500	.
chr2	.	wtEM_EN_g6d3n6_DMR	1017551	1017650	1	.	100	.
chr2	.	wtEM_EN_g6d3n6_DMR	1018951	1019100	1	.	150	.
chr2	.	wtEM_EN_g6d3n6_DMR	1021451	1021550	1	.	100	.
chr2	.	wtEM_EN_g6d3n6_DMR	1027451	1027850	1	.	400	.
chr2	.	wtEM_EN_g6d3n6_DMR	1051601	1051700	1	.	100	.
chr2	.	wtEM_EN_g6d3n6_DMR	1052901	1053050	1	.	150	.
chr2	.	wtEM_EN_g6d3n6_DMR	1065651	1066100	1	.	450	.
chr2	.	wtEM_EN_g6d3n6_DMR	1075851	1076050	1	.	200	.
chr2	.	wtEM_EN_g6d3n6_DMR	1078801	1079000	1	.	200	.
chr2	.	wtEM_EN_g6d3n6_DMR	1079801	1079950	1	.	150	.
chr2	.	wtEM_EN_g6d3n6_DMR	1088751	1088950	1	.	200	.
chr2	.	wtEM_EN_g6d3n6_DMR	1099151	1099250	1	.	100	.
chr2	.	wtEM_EN_g6d3n6_DMR	1107101	1107300	1	.	200	.
chr2	.	wtEM_EN_g6d3n6_DMR	1107951	1108700	1	.	750	.
chr2	.	wtEM_EN_g6d3n6_DMR	1111301	1111700	1	.	400	.
chr2	.	wtEM_EN_g6d3n6_DMR	1112751	1112950	1	.	200	.
chr2	.	wtEM_EN_g6d3n6_DMR	1118251	1118850	1	.	600	.
chr2	.	wtEM_EN_g6d3n6_DMR	1123751	1124050	1	.	300	.
chr2	.	wtEM_EN_g6d3n6_DMR	1126401	1126500	1	.	100	.
chr2	.	wtEM_EN_g6d3n6_DMR	1154801	1155200	1	.	400	.
chr2	.	wtEM_EN_g6d3n6_DMR	1167551	1168500	1	.	950	.
chr2	.	wtEM_EN_g6d3n6_DMR	1177901	1178050	1	.	150	.
chr2	.	wtEM_EN_g6d3n6_DMR	1178801	1179350	1	.	550	.
chr2	.	wtEM_EN_g6d3n6_DMR	1190301	1190450	1	.	150	.
chr2	.	wtEM_EN_g6d3n6_DMR	1194201	1195250	1	.	1050	.
chr2	.	wtEM_EN_g6d3n6_DMR	1198151	1199000	1	.	850	.
chr2	.	wtEM_EN_g6d3n6_DMR	1199501	1199700	1	.	200	.
chr2	.	wtEM_EN_g6d3n6_DMR	1200151	1200600	1	.	450	.
chr2	.	wtEM_EN_g6d3n6_DMR	1201351	1204450	1	.	3100	.
chr2	.	wtEM_EN_g6d3n6_DMR	1205551	1205650	1	.	100	.
chr2	.	wtEM_EN_g6d3n6_DMR	1206601	1207000	1	.	400	.
chr2	.	wtEM_EN_g6d3n6_DMR	1209301	1209450	1	.	150	.
chr2	.	wtEM_EN_g6d3n6_DMR	1210551	1210750	1	.	200	.
chr2	.	wtEM_EN_g6d3n6_DMR	1211151	1211350	1	.	200	.
chr2	.	wtEM_EN_g6d3n6_DMR	1213401	1213500	1	.	100	.
chr2	.	wtEM_EN_g6d3n6_DMR	1214951	1215600	1	.	650	.
chr2	.	wtEM_EN_g6d3n6_DMR	1216051	1216250	1	.	200	.
chr2	.	wtEM_EN_g6d3n6_DMR	1217801	1218600	1	.	800	.
chr2	.	wtEM_EN_g6d3n6_DMR	1219601	1219750	1	.	150	.
chr2	.	wtEM_EN_g6d3n6_DMR	1220251	1220400	1	.	150	.
chr2	.	wtEM_EN_g6d3n6_DMR	1221151	1221550	1	.	400	.
chr2	.	wtEM_EN_g6d3n6_DMR	1221951	1222400	1	.	450	.
chr2	.	wtEM_EN_g6d3n6_DMR	1222901	1223100	1	.	200	.
chr2	.	wtEM_EN_g6d3n6_DMR	1224451	1224800	1	.	350	.
chr2	.	wtEM_EN_g6d3n6_DMR	1226551	1226700	1	.	150	.
chr2	.	wtEM_EN_g6d3n6_DMR	1228551	1228800	1	.	250	.
chr2	.	wtEM_EN_g6d3n6_DMR	1233051	1233250	1	.	200	.
chr2	.	wtEM_EN_g6d3n6_DMR	1234501	1234600	1	.	100	.
chr2	.	wtEM_EN_g6d3n6_DMR	1237051	1237300	1	.	250	.
chr2	.	wtEM_EN_g6d3n6_DMR	1238751	1239100	1	.	350	.
chr2	.	wtEM_EN_g6d3n6_DMR	1240551	1240800	1	.	250	.
chr2	.	wtEM_EN_g6d3n6_DMR	1241251	1241600	1	.	350	.
chr2	.	wtEM_EN_g6d3n6_DMR	1243401	1244000	1	.	600	.
chr2	.	wtEM_EN_g6d3n6_DMR	1246201	1246750	1	.	550	.
chr2	.	wtEM_EN_g6d3n6_DMR	1247701	1247900	1	.	200	.
chr2	.	wtEM_EN_g6d3n6_DMR	1263951	1264100	1	.	150	.
chr2	.	wtEM_EN_g6d3n6_DMR	1267901	1268600	1	.	700	.
chr2	.	wtEM_EN_g6d3n6_DMR	1279851	1279950	1	.	100	.
chr2	.	wtEM_EN_g6d3n6_DMR	1286701	1286950	1	.	250	.
chr2	.	wtEM_EN_g6d3n6_DMR	1287601	1287700	1	.	100	.
chr2	.	wtEM_EN_g6d3n6_DMR	1288201	1288550	1	.	350	.
chr2	.	wtEM_EN_g6d3n6_DMR	1292801	1294550	1	.	1750	.
chr2	.	wtEM_EN_g6d3n6_DMR	1296851	1298100	1	.	1250	.
chr2	.	wtEM_EN_g6d3n6_DMR	1301701	1301950	1	.	250	.
chr2	.	wtEM_EN_g6d3n6_DMR	1306351	1307150	1	.	800	.
chr2	.	wtEM_EN_g6d3n6_DMR	1307701	1308000	1	.	300	.
chr2	.	wtEM_EN_g6d3n6_DMR	1308751	1310100	1	.	1350	.
chr2	.	wtEM_EN_g6d3n6_DMR	1310751	1311150	1	.	400	.
chr2	.	wtEM_EN_g6d3n6_DMR	1311801	1311950	1	.	150	.
chr2	.	wtEM_EN_g6d3n6_DMR	1312651	1313900	1	.	1250	.
chr2	.	wtEM_EN_g6d3n6_DMR	1314251	1314450	1	.	200	.
chr2	.	wtEM_EN_g6d3n6_DMR	1318501	1318650	1	.	150	.
chr2	.	wtEM_EN_g6d3n6_DMR	1342201	1344300	1	.	2100	.
chr2	.	wtEM_EN_g6d3n6_DMR	1345801	1346350	1	.	550	.
chr2	.	wtEM_EN_g6d3n6_DMR	1346851	1347450	1	.	600	.
chr2	.	wtEM_EN_g6d3n6_DMR	1349401	1349750	1	.	350	.
chr2	.	wtEM_EN_g6d3n6_DMR	1351951	1352050	1	.	100	.
chr2	.	wtEM_EN_g6d3n6_DMR	1353451	1353600	1	.	150	.
chr2	.	wtEM_EN_g6d3n6_DMR	1360901	1361150	1	.	250	.
chr2	.	wtEM_EN_g6d3n6_DMR	1367001	1367500	1	.	500	.
chr2	.	wtEM_EN_g6d3n6_DMR	1370451	1370650	1	.	200	.
chr2	.	wtEM_EN_g6d3n6_DMR	1372951	1373350	1	.	400	.
chr2	.	wtEM_EN_g6d3n6_DMR	1383851	1384100	1	.	250	.
chr2	.	wtEM_EN_g6d3n6_DMR	1391001	1391250	1	.	250	.
chr2	.	wtEM_EN_g6d3n6_DMR	1395101	1395450	1	.	350	.
chr2	.	wtEM_EN_g6d3n6_DMR	1396801	1397100	1	.	300	.
chr2	.	wtEM_EN_g6d3n6_DMR	1408601	1409000	1	.	400	.
chr2	.	wtEM_EN_g6d3n6_DMR	1410551	1410800	1	.	250	.
[truncated: 6,208 more rows]

## Sheet: h1_EM_EN_DMR list
Supplemental dataset1 h1 embryo vs endosperm DMR list with tair8 coordinates
chr1	.	h1EM_EN_g6d3n6_DMR	301	950	1	.	650	.
chr1	.	h1EM_EN_g6d3n6_DMR	17551	18750	1	.	1200	.
chr1	.	h1EM_EN_g6d3n6_DMR	39201	39300	1	.	100	.
chr1	.	h1EM_EN_g6d3n6_DMR	40201	40350	1	.	150	.
chr1	.	h1EM_EN_g6d3n6_DMR	55801	56000	1	.	200	.
chr1	.	h1EM_EN_g6d3n6_DMR	70651	70900	1	.	250	.
chr1	.	h1EM_EN_g6d3n6_DMR	76851	77400	1	.	550	.
chr1	.	h1EM_EN_g6d3n6_DMR	122301	122500	1	.	200	.
chr1	.	h1EM_EN_g6d3n6_DMR	193351	193700	1	.	350	.
chr1	.	h1EM_EN_g6d3n6_DMR	213551	213750	1	.	200	.
chr1	.	h1EM_EN_g6d3n6_DMR	238351	238450	1	.	100	.
chr1	.	h1EM_EN_g6d3n6_DMR	239051	239300	1	.	250	.
chr1	.	h1EM_EN_g6d3n6_DMR	255801	256700	1	.	900	.
chr1	.	h1EM_EN_g6d3n6_DMR	257851	258500	1	.	650	.
chr1	.	h1EM_EN_g6d3n6_DMR	289001	289400	1	.	400	.
chr1	.	h1EM_EN_g6d3n6_DMR	291851	292050	1	.	200	.
chr1	.	h1EM_EN_g6d3n6_DMR	372501	372600	1	.	100	.
chr1	.	h1EM_EN_g6d3n6_DMR	376351	376650	1	.	300	.
chr1	.	h1EM_EN_g6d3n6_DMR	422751	423200	1	.	450	.
chr1	.	h1EM_EN_g6d3n6_DMR	431951	432850	1	.	900	.
chr1	.	h1EM_EN_g6d3n6_DMR	433551	433750	1	.	200	.
chr1	.	h1EM_EN_g6d3n6_DMR	499351	501150	1	.	1800	.
chr1	.	h1EM_EN_g6d3n6_DMR	540451	540900	1	.	450	.
chr1	.	h1EM_EN_g6d3n6_DMR	549551	549800	1	.	250	.
chr1	.	h1EM_EN_g6d3n6_DMR	550251	550350	1	.	100	.
chr1	.	h1EM_EN_g6d3n6_DMR	550751	550900	1	.	150	.
chr1	.	h1EM_EN_g6d3n6_DMR	573001	573250	1	.	250	.
chr1	.	h1EM_EN_g6d3n6_DMR	634151	634250	1	.	100	.
chr1	.	h1EM_EN_g6d3n6_DMR	640351	641000	1	.	650	.
chr1	.	h1EM_EN_g6d3n6_DMR	670201	670950	1	.	750	.
chr1	.	h1EM_EN_g6d3n6_DMR	696701	697500	1	.	800	.
chr1	.	h1EM_EN_g6d3n6_DMR	705101	705200	1	.	100	.
chr1	.	h1EM_EN_g6d3n6_DMR	759801	760450	1	.	650	.
chr1	.	h1EM_EN_g6d3n6_DMR	781051	782250	1	.	1200	.
chr1	.	h1EM_EN_g6d3n6_DMR	785001	785350	1	.	350	.
chr1	.	h1EM_EN_g6d3n6_DMR	791701	792050	1	.	350	.
chr1	.	h1EM_EN_g6d3n6_DMR	822051	822450	1	.	400	.
chr1	.	h1EM_EN_g6d3n6_DMR	847001	847100	1	.	100	.
chr1	.	h1EM_EN_g6d3n6_DMR	855401	855500	1	.	100	.
chr1	.	h1EM_EN_g6d3n6_DMR	888601	889500	1	.	900	.
chr1	.	h1EM_EN_g6d3n6_DMR	891051	891450	1	.	400	.
chr1	.	h1EM_EN_g6d3n6_DMR	944201	944400	1	.	200	.
chr1	.	h1EM_EN_g6d3n6_DMR	958501	958600	1	.	100	.
chr1	.	h1EM_EN_g6d3n6_DMR	1007151	1007300	1	.	150	.
chr1	.	h1EM_EN_g6d3n6_DMR	1038801	1038900	1	.	100	.
chr1	.	h1EM_EN_g6d3n6_DMR	1160151	1161250	1	.	1100	.
chr1	.	h1EM_EN_g6d3n6_DMR	1184551	1185250	1	.	700	.
chr1	.	h1EM_EN_g6d3n6_DMR	1186101	1186500	1	.	400	.
chr1	.	h1EM_EN_g6d3n6_DMR	1194301	1194850	1	.	550	.
chr1	.	h1EM_EN_g6d3n6_DMR	1204901	1205000	1	.	100	.
chr1	.	h1EM_EN_g6d3n6_DMR	1249751	1250900	1	.	1150	.
chr1	.	h1EM_EN_g6d3n6_DMR	1275901	1276250	1	.	350	.
chr1	.	h1EM_EN_g6d3n6_DMR	1276601	1276700	1	.	100	.
chr1	.	h1EM_EN_g6d3n6_DMR	1286851	1287000	1	.	150	.
chr1	.	h1EM_EN_g6d3n6_DMR	1289201	1289500	1	.	300	.
chr1	.	h1EM_EN_g6d3n6_DMR	1344451	1344600	1	.	150	.
chr1	.	h1EM_EN_g6d3n6_DMR	1379551	1379850	1	.	300	.
chr1	.	h1EM_EN_g6d3n6_DMR	1402201	1402300	1	.	100	.
chr1	.	h1EM_EN_g6d3n6_DMR	1441601	1441850	1	.	250	.
chr1	.	h1EM_EN_g6d3n6_DMR	1444351	1444550	1	.	200	.
chr1	.	h1EM_EN_g6d3n6_DMR	1445301	1445650	1	.	350	.
chr1	.	h1EM_EN_g6d3n6_DMR	1474051	1474150	1	.	100	.
chr1	.	h1EM_EN_g6d3n6_DMR	1488801	1489350	1	.	550	.
chr1	.	h1EM_EN_g6d3n6_DMR	1522751	1523450	1	.	700	.
chr1	.	h1EM_EN_g6d3n6_DMR	1532601	1532800	1	.	200	.
chr1	.	h1EM_EN_g6d3n6_DMR	1533351	1533450	1	.	100	.
chr1	.	h1EM_EN_g6d3n6_DMR	1592451	1593250	1	.	800	.
chr1	.	h1EM_EN_g6d3n6_DMR	1598251	1598650	1	.	400	.
chr1	.	h1EM_EN_g6d3n6_DMR	1613251	1613400	1	.	150	.
chr1	.	h1EM_EN_g6d3n6_DMR	1614501	1614700	1	.	200	.
chr1	.	h1EM_EN_g6d3n6_DMR	1617751	1618000	1	.	250	.
chr1	.	h1EM_EN_g6d3n6_DMR	1632651	1633050	1	.	400	.
chr1	.	h1EM_EN_g6d3n6_DMR	1634301	1634400	1	.	100	.
chr1	.	h1EM_EN_g6d3n6_DMR	1655851	1656300	1	.	450	.
chr1	.	h1EM_EN_g6d3n6_DMR	1676501	1677100	1	.	600	.
chr1	.	h1EM_EN_g6d3n6_DMR	1680851	1681050	1	.	200	.
chr1	.	h1EM_EN_g6d3n6_DMR	1705951	1706450	1	.	500	.
chr1	.	h1EM_EN_g6d3n6_DMR	1728651	1729300	1	.	650	.
chr1	.	h1EM_EN_g6d3n6_DMR	1736001	1737100	1	.	1100	.
chr1	.	h1EM_EN_g6d3n6_DMR	1810101	1810550	1	.	450	.
chr1	.	h1EM_EN_g6d3n6_DMR	1846851	1847050	1	.	200	.
chr1	.	h1EM_EN_g6d3n6_DMR	1875451	1876750	1	.	1300	.
chr1	.	h1EM_EN_g6d3n6_DMR	1884151	1884400	1	.	250	.
chr1	.	h1EM_EN_g6d3n6_DMR	1916751	1916850	1	.	100	.
chr1	.	h1EM_EN_g6d3n6_DMR	1924651	1924750	1	.	100	.
chr1	.	h1EM_EN_g6d3n6_DMR	1968001	1968550	1	.	550	.
chr1	.	h1EM_EN_g6d3n6_DMR	1976001	1976300	1	.	300	.
chr1	.	h1EM_EN_g6d3n6_DMR	1976751	1976900	1	.	150	.
chr1	.	h1EM_EN_g6d3n6_DMR	2189351	2189650	1	.	300	.
chr1	.	h1EM_EN_g6d3n6_DMR	2208501	2208750	1	.	250	.
chr1	.	h1EM_EN_g6d3n6_DMR	2234201	2234900	1	.	700	.
chr1	.	h1EM_EN_g6d3n6_DMR	2314201	2314300	1	.	100	.
chr1	.	h1EM_EN_g6d3n6_DMR	2340251	2340450	1	.	200	.
chr1	.	h1EM_EN_g6d3n6_DMR	2382351	2382500	1	.	150	.
chr1	.	h1EM_EN_g6d3n6_DMR	2382851	2383650	1	.	800	.
chr1	.	h1EM_EN_g6d3n6_DMR	2415851	2416050	1	.	200	.
chr1	.	h1EM_EN_g6d3n6_DMR	2526851	2527050	1	.	200	.
chr1	.	h1EM_EN_g6d3n6_DMR	2531401	2531700	1	.	300	.
chr1	.	h1EM_EN_g6d3n6_DMR	2540401	2540500	1	.	100	.
chr1	.	h1EM_EN_g6d3n6_DMR	2587001	2588350	1	.	1350	.
chr1	.	h1EM_EN_g6d3n6_DMR	2617301	2617750	1	.	450	.
chr1	.	h1EM_EN_g6d3n6_DMR	2633901	2634000	1	.	100	.
chr1	.	h1EM_EN_g6d3n6_DMR	2723301	2723400	1	.	100	.
chr1	.	h1EM_EN_g6d3n6_DMR	2725451	2727150	1	.	1700	.
chr1	.	h1EM_EN_g6d3n6_DMR	2728051	2728150	1	.	100	.
chr1	.	h1EM_EN_g6d3n6_DMR	2729851	2730450	1	.	600	.
chr1	.	h1EM_EN_g6d3n6_DMR	2763551	2764300	1	.	750	.
chr1	.	h1EM_EN_g6d3n6_DMR	2767351	2767650	1	.	300	.
chr1	.	h1EM_EN_g6d3n6_DMR	2788501	2789400	1	.	900	.
chr1	.	h1EM_EN_g6d3n6_DMR	2940851	2941150	1	.	300	.
chr1	.	h1EM_EN_g6d3n6_DMR	2980201	2980300	1	.	100	.
chr1	.	h1EM_EN_g6d3n6_DMR	2987001	2987150	1	.	150	.
chr1	.	h1EM_EN_g6d3n6_DMR	2993251	2993800	1	.	550	.
chr1	.	h1EM_EN_g6d3n6_DMR	3023551	3024000	1	.	450	.
chr1	.	h1EM_EN_g6d3n6_DMR	3063451	3063650	1	.	200	.
chr1	.	h1EM_EN_g6d3n6_DMR	3073051	3075000	1	.	1950	.
chr1	.	h1EM_EN_g6d3n6_DMR	3078351	3078600	1	.	250	.
chr1	.	h1EM_EN_g6d3n6_DMR	3111201	3111300	1	.	100	.
chr1	.	h1EM_EN_g6d3n6_DMR	3134151	3134250	1	.	100	.
chr1	.	h1EM_EN_g6d3n6_DMR	3225351	3225450	1	.	100	.
chr1	.	h1EM_EN_g6d3n6_DMR	3250601	3251500	1	.	900	.
chr1	.	h1EM_EN_g6d3n6_DMR	3329551	3329650	1	.	100	.
chr1	.	h1EM_EN_g6d3n6_DMR	3342451	3342750	1	.	300	.
chr1	.	h1EM_EN_g6d3n6_DMR	3343101	3345650	1	.	2550	.
chr1	.	h1EM_EN_g6d3n6_DMR	3362151	3362250	1	.	100	.
chr1	.	h1EM_EN_g6d3n6_DMR	3384501	3385100	1	.	600	.
chr1	.	h1EM_EN_g6d3n6_DMR	3400051	3400150	1	.	100	.
chr1	.	h1EM_EN_g6d3n6_DMR	3412901	3413150	1	.	250	.
chr1	.	h1EM_EN_g6d3n6_DMR	3413651	3413900	1	.	250	.
chr1	.	h1EM_EN_g6d3n6_DMR	3497701	3498900	1	.	1200	.
chr1	.	h1EM_EN_g6d3n6_DMR	3546801	3547850	1	.	1050	.
chr1	.	h1EM_EN_g6d3n6_DMR	3551351	3552350	1	.	1000	.
chr1	.	h1EM_EN_g6d3n6_DMR	3595901	3596050	1	.	150	.
chr1	.	h1EM_EN_g6d3n6_DMR	3621801	3622050	1	.	250	.
chr1	.	h1EM_EN_g6d3n6_DMR	3634801	3634900	1	.	100	.
chr1	.	h1EM_EN_g6d3n6_DMR	3729901	3730300	1	.	400	.
chr1	.	h1EM_EN_g6d3n6_DMR	3762201	3763000	1	.	800	.
chr1	.	h1EM_EN_g6d3n6_DMR	3770951	3771100	1	.	150	.
chr1	.	h1EM_EN_g6d3n6_DMR	3825901	3826300	1	.	400	.
chr1	.	h1EM_EN_g6d3n6_DMR	3827451	3827550	1	.	100	.
chr1	.	h1EM_EN_g6d3n6_DMR	3853951	3854100	1	.	150	.
chr1	.	h1EM_EN_g6d3n6_DMR	3893301	3893500	1	.	200	.
chr1	.	h1EM_EN_g6d3n6_DMR	3897551	3898300	1	.	750	.
chr1	.	h1EM_EN_g6d3n6_DMR	3920001	3920150	1	.	150	.
chr1	.	h1EM_EN_g6d3n6_DMR	3921101	3921700	1	.	600	.
chr1	.	h1EM_EN_g6d3n6_DMR	3922151	3923250	1	.	1100	.
chr1	.	h1EM_EN_g6d3n6_DMR	3925401	3927000	1	.	1600	.
chr1	.	h1EM_EN_g6d3n6_DMR	3980101	3980850	1	.	750	.
chr1	.	h1EM_EN_g6d3n6_DMR	3982451	3983300	1	.	850	.
chr1	.	h1EM_EN_g6d3n6_DMR	3984001	3984650	1	.	650	.
chr1	.	h1EM_EN_g6d3n6_DMR	4040651	4041250	1	.	600	.
chr1	.	h1EM_EN_g6d3n6_DMR	4042151	4042250	1	.	100	.
chr1	.	h1EM_EN_g6d3n6_DMR	4061451	4061900	1	.	450	.
chr1	.	h1EM_EN_g6d3n6_DMR	4110051	4111450	1	.	1400	.
chr1	.	h1EM_EN_g6d3n6_DMR	4112101	4112400	1	.	300	.
chr1	.	h1EM_EN_g6d3n6_DMR	4209551	4209650	1	.	100	.
chr1	.	h1EM_EN_g6d3n6_DMR	4293101	4293850	1	.	750	.
chr1	.	h1EM_EN_g6d3n6_DMR	4313201	4313400	1	.	200	.
chr1	.	h1EM_EN_g6d3n6_DMR	4334351	4334450	1	.	100	.
chr1	.	h1EM_EN_g6d3n6_DMR	4345651	4345850	1	.	200	.
chr1	.	h1EM_EN_g6d3n6_DMR	4363201	4363350	1	.	150	.
chr1	.	h1EM_EN_g6d3n6_DMR	4406751	4408700	1	.	1950	.
chr1	.	h1EM_EN_g6d3n6_DMR	4409051	4411200	1	.	2150	.
chr1	.	h1EM_EN_g6d3n6_DMR	4413701	4414150	1	.	450	.
chr1	.	h1EM_EN_g6d3n6_DMR	4415351	4416100	1	.	750	.
chr1	.	h1EM_EN_g6d3n6_DMR	4436851	4437000	1	.	150	.
chr1	.	h1EM_EN_g6d3n6_DMR	4493701	4494150	1	.	450	.
chr1	.	h1EM_EN_g6d3n6_DMR	4505851	4505950	1	.	100	.
chr1	.	h1EM_EN_g6d3n6_DMR	4582951	4583550	1	.	600	.
chr1	.	h1EM_EN_g6d3n6_DMR	4595101	4595600	1	.	500	.
chr1	.	h1EM_EN_g6d3n6_DMR	4596951	4597300	1	.	350	.
chr1	.	h1EM_EN_g6d3n6_DMR	4603601	4604000	1	.	400	.
chr1	.	h1EM_EN_g6d3n6_DMR	4616951	4617300	1	.	350	.
chr1	.	h1EM_EN_g6d3n6_DMR	4685751	4686000	1	.	250	.
chr1	.	h1EM_EN_g6d3n6_DMR	4705351	4705450	1	.	100	.
chr1	.	h1EM_EN_g6d3n6_DMR	4738501	4738750	1	.	250	.
chr1	.	h1EM_EN_g6d3n6_DMR	4739251	4739500	1	.	250	.
chr1	.	h1EM_EN_g6d3n6_DMR	4770501	4770750	1	.	250	.
chr1	.	h1EM_EN_g6d3n6_DMR	4773151	4773300	1	.	150	.
chr1	.	h1EM_EN_g6d3n6_DMR	4780001	4780200	1	.	200	.
chr1	.	h1EM_EN_g6d3n6_DMR	4785801	4787250	1	.	1450	.
chr1	.	h1EM_EN_g6d3n6_DMR	4856651	4856800	1	.	150	.
chr1	.	h1EM_EN_g6d3n6_DMR	4860401	4860600	1	.	200	.
chr1	.	h1EM_EN_g6d3n6_DMR	4862351	4862650	1	.	300	.
chr1	.	h1EM_EN_g6d3n6_DMR	4957151	4957650	1	.	500	.
chr1	.	h1EM_EN_g6d3n6_DMR	4985901	4986050	1	.	150	.
chr1	.	h1EM_EN_g6d3n6_DMR	4992751	4993250	1	.	500	.
chr1	.	h1EM_EN_g6d3n6_DMR	5044801	5045000	1	.	200	.
chr1	.	h1EM_EN_g6d3n6_DMR	5056001	5056350	1	.	350	.
chr1	.	h1EM_EN_g6d3n6_DMR	5098851	5098950	1	.	100	.
chr1	.	h1EM_EN_g6d3n6_DMR	5101301	5102150	1	.	850	.
chr1	.	h1EM_EN_g6d3n6_DMR	5171901	5172150	1	.	250	.
chr1	.	h1EM_EN_g6d3n6_DMR	5352751	5353050	1	.	300	.
chr1	.	h1EM_EN_g6d3n6_DMR	5353851	5355600	1	.	1750	.
chr1	.	h1EM_EN_g6d3n6_DMR	5357001	5357150	1	.	150	.
chr1	.	h1EM_EN_g6d3n6_DMR	5378251	5378350	1	.	100	.
chr1	.	h1EM_EN_g6d3n6_DMR	5389651	5389850	1	.	200	.
chr1	.	h1EM_EN_g6d3n6_DMR	5391501	5391600	1	.	100	.
chr1	.	h1EM_EN_g6d3n6_DMR	5392451	5392600	1	.	150	.
chr1	.	h1EM_EN_g6d3n6_DMR	5394951	5395250	1	.	300	.
chr1	.	h1EM_EN_g6d3n6_DMR	5395601	5395800	1	.	200	.
chr1	.	h1EM_EN_g6d3n6_DMR	5433301	5433400	1	.	100	.
chr1	.	h1EM_EN_g6d3n6_DMR	5436901	5437850	1	.	950	.
chr1	.	h1EM_EN_g6d3n6_DMR	5531251	5531900	1	.	650	.
chr1	.	h1EM_EN_g6d3n6_DMR	5637201	5637700	1	.	500	.
chr1	.	h1EM_EN_g6d3n6_DMR	5657451	5657600	1	.	150	.
chr1	.	h1EM_EN_g6d3n6_DMR	5657951	5658300	1	.	350	.
chr1	.	h1EM_EN_g6d3n6_DMR	5658901	5659250	1	.	350	.
chr1	.	h1EM_EN_g6d3n6_DMR	5689351	5689450	1	.	100	.
chr1	.	h1EM_EN_g6d3n6_DMR	5691751	5691900	1	.	150	.
chr1	.	h1EM_EN_g6d3n6_DMR	5762051	5762400	1	.	350	.
chr1	.	h1EM_EN_g6d3n6_DMR	5779451	5779550	1	.	100	.
chr1	.	h1EM_EN_g6d3n6_DMR	5798801	5799550	1	.	750	.
chr1	.	h1EM_EN_g6d3n6_DMR	5863051	5863500	1	.	450	.
chr1	.	h1EM_EN_g6d3n6_DMR	5866651	5867150	1	.	500	.
chr1	.	h1EM_EN_g6d3n6_DMR	5899201	5899800	1	.	600	.
chr1	.	h1EM_EN_g6d3n6_DMR	5911751	5911900	1	.	150	.
chr1	.	h1EM_EN_g6d3n6_DMR	5965401	5966400	1	.	1000	.
chr1	.	h1EM_EN_g6d3n6_DMR	5970801	5971900	1	.	1100	.
chr1	.	h1EM_EN_g6d3n6_DMR	5974851	5975800	1	.	950	.
chr1	.	h1EM_EN_g6d3n6_DMR	6020601	6020700	1	.	100	.
chr1	.	h1EM_EN_g6d3n6_DMR	6040301	6040400	1	.	100	.
chr1	.	h1EM_EN_g6d3n6_DMR	6040951	6042900	1	.	1950	.
chr1	.	h1EM_EN_g6d3n6_DMR	6044051	6044350	1	.	300	.
chr1	.	h1EM_EN_g6d3n6_DMR	6046701	6046900	1	.	200	.
chr1	.	h1EM_EN_g6d3n6_DMR	6051001	6051100	1	.	100	.
chr1	.	h1EM_EN_g6d3n6_DMR	6075101	6075500	1	.	400	.
chr1	.	h1EM_EN_g6d3n6_DMR	6102451	6102800	1	.	350	.
chr1	.	h1EM_EN_g6d3n6_DMR	6127801	6127950	1	.	150	.
chr1	.	h1EM_EN_g6d3n6_DMR	6140501	6141400	1	.	900	.
chr1	.	h1EM_EN_g6d3n6_DMR	6156851	6157100	1	.	250	.
chr1	.	h1EM_EN_g6d3n6_DMR	6158001	6158800	1	.	800	.
chr1	.	h1EM_EN_g6d3n6_DMR	6196601	6196700	1	.	100	.
chr1	.	h1EM_EN_g6d3n6_DMR	6197401	6198150	1	.	750	.
chr1	.	h1EM_EN_g6d3n6_DMR	6199301	6199400	1	.	100	.
chr1	.	h1EM_EN_g6d3n6_DMR	6233901	6234250	1	.	350	.
chr1	.	h1EM_EN_g6d3n6_DMR	6234651	6235150	1	.	500	.
chr1	.	h1EM_EN_g6d3n6_DMR	6235601	6236350	1	.	750	.
chr1	.	h1EM_EN_g6d3n6_DMR	6236701	6236800	1	.	100	.
chr1	.	h1EM_EN_g6d3n6_DMR	6237551	6237850	1	.	300	.
chr1	.	h1EM_EN_g6d3n6_DMR	6276301	6276450	1	.	150	.
chr1	.	h1EM_EN_g6d3n6_DMR	6288801	6288900	1	.	100	.
chr1	.	h1EM_EN_g6d3n6_DMR	6379451	6380250	1	.	800	.
chr1	.	h1EM_EN_g6d3n6_DMR	6380651	6380750	1	.	100	.
chr1	.	h1EM_EN_g6d3n6_DMR	6402101	6402200	1	.	100	.
chr1	.	h1EM_EN_g6d3n6_DMR	6402901	6405400	1	.	2500	.
chr1	.	h1EM_EN_g6d3n6_DMR	6406901	6407300	1	.	400	.
chr1	.	h1EM_EN_g6d3n6_DMR	6415601	6415700	1	.	100	.
chr1	.	h1EM_EN_g6d3n6_DMR	6425901	6426550	1	.	650	.
chr1	.	h1EM_EN_g6d3n6_DMR	6439351	6439600	1	.	250	.
chr1	.	h1EM_EN_g6d3n6_DMR	6455201	6455300	1	.	100	.
chr1	.	h1EM_EN_g6d3n6_DMR	6470401	6471150	1	.	750	.
chr1	.	h1EM_EN_g6d3n6_DMR	6472751	6473350	1	.	600	.
chr1	.	h1EM_EN_g6d3n6_DMR	6484701	6484800	1	.	100	.
chr1	.	h1EM_EN_g6d3n6_DMR	6513901	6514000	1	.	100	.
chr1	.	h1EM_EN_g6d3n6_DMR	6514351	6515350	1	.	1000	.
chr1	.	h1EM_EN_g6d3n6_DMR	6538551	6538750	1	.	200	.
chr1	.	h1EM_EN_g6d3n6_DMR	6539301	6542650	1	.	3350	.
chr1	.	h1EM_EN_g6d3n6_DMR	6573851	6575350	1	.	1500	.
chr1	.	h1EM_EN_g6d3n6_DMR	6587951	6588400	1	.	450	.
chr1	.	h1EM_EN_g6d3n6_DMR	6589001	6589950	1	.	950	.
chr1	.	h1EM_EN_g6d3n6_DMR	6592651	6593300	1	.	650	.
chr1	.	h1EM_EN_g6d3n6_DMR	6597151	6597400	1	.	250	.
chr1	.	h1EM_EN_g6d3n6_DMR	6597951	6598200	1	.	250	.
chr1	.	h1EM_EN_g6d3n6_DMR	6598701	6598800	1	.	100	.
chr1	.	h1EM_EN_g6d3n6_DMR	6615401	6615650	1	.	250	.
chr1	.	h1EM_EN_g6d3n6_DMR	6640301	6641000	1	.	700	.
chr1	.	h1EM_EN_g6d3n6_DMR	6659851	6660500	1	.	650	.
chr1	.	h1EM_EN_g6d3n6_DMR	6661851	6661950	1	.	100	.
chr1	.	h1EM_EN_g6d3n6_DMR	6667901	6668150	1	.	250	.
chr1	.	h1EM_EN_g6d3n6_DMR	6704351	6704450	1	.	100	.
chr1	.	h1EM_EN_g6d3n6_DMR	6704951	6706250	1	.	1300	.
chr1	.	h1EM_EN_g6d3n6_DMR	6706601	6708600	1	.	2000	.
chr1	.	h1EM_EN_g6d3n6_DMR	6709451	6709700	1	.	250	.
chr1	.	h1EM_EN_g6d3n6_DMR	6715201	6715450	1	.	250	.
chr1	.	h1EM_EN_g6d3n6_DMR	6718051	6719050	1	.	1000	.
chr1	.	h1EM_EN_g6d3n6_DMR	6720901	6721100	1	.	200	.
chr1	.	h1EM_EN_g6d3n6_DMR	6730401	6730550	1	.	150	.
chr1	.	h1EM_EN_g6d3n6_DMR	6732301	6732600	1	.	300	.
chr1	.	h1EM_EN_g6d3n6_DMR	6736151	6737350	1	.	1200	.
chr1	.	h1EM_EN_g6d3n6_DMR	6756551	6756850	1	.	300	.
chr1	.	h1EM_EN_g6d3n6_DMR	6758851	6759300	1	.	450	.
chr1	.	h1EM_EN_g6d3n6_DMR	6770351	6770700	1	.	350	.
chr1	.	h1EM_EN_g6d3n6_DMR	6778051	6778150	1	.	100	.
chr1	.	h1EM_EN_g6d3n6_DMR	6795351	6795600	1	.	250	.
chr1	.	h1EM_EN_g6d3n6_DMR	6817501	6817650	1	.	150	.
chr1	.	h1EM_EN_g6d3n6_DMR	6927201	6927500	1	.	300	.
chr1	.	h1EM_EN_g6d3n6_DMR	7023501	7024550	1	.	1050	.
chr1	.	h1EM_EN_g6d3n6_DMR	7026901	7027100	1	.	200	.
chr1	.	h1EM_EN_g6d3n6_DMR	7035551	7037250	1	.	1700	.
chr1	.	h1EM_EN_g6d3n6_DMR	7065701	7065950	1	.	250	.
chr1	.	h1EM_EN_g6d3n6_DMR	7076801	7076950	1	.	150	.
chr1	.	h1EM_EN_g6d3n6_DMR	7077801	7078000	1	.	200	.
chr1	.	h1EM_EN_g6d3n6_DMR	7132351	7132950	1	.	600	.
chr1	.	h1EM_EN_g6d3n6_DMR	7138251	7138800	1	.	550	.
chr1	.	h1EM_EN_g6d3n6_DMR	7148601	7148800	1	.	200	.
chr1	.	h1EM_EN_g6d3n6_DMR	7201751	7202050	1	.	300	.
chr1	.	h1EM_EN_g6d3n6_DMR	7227651	7228150	1	.	500	.
chr1	.	h1EM_EN_g6d3n6_DMR	7249201	7249850	1	.	650	.
chr1	.	h1EM_EN_g6d3n6_DMR	7256451	7257000	1	.	550	.
chr1	.	h1EM_EN_g6d3n6_DMR	7278651	7278750	1	.	100	.
chr1	.	h1EM_EN_g6d3n6_DMR	7279851	7280000	1	.	150	.
chr1	.	h1EM_EN_g6d3n6_DMR	7283401	7284100	1	.	700	.
chr1	.	h1EM_EN_g6d3n6_DMR	7313051	7313500	1	.	450	.
chr1	.	h1EM_EN_g6d3n6_DMR	7344401	7344550	1	.	150	.
chr1	.	h1EM_EN_g6d3n6_DMR	7364151	7365100	1	.	950	.
chr1	.	h1EM_EN_g6d3n6_DMR	7373551	7373800	1	.	250	.
chr1	.	h1EM_EN_g6d3n6_DMR	7392301	7392900	1	.	600	.
chr1	.	h1EM_EN_g6d3n6_DMR	7393301	7393400	1	.	100	.
chr1	.	h1EM_EN_g6d3n6_DMR	7394251	7394650	1	.	400	.
chr1	.	h1EM_EN_g6d3n6_DMR	7409351	7409600	1	.	250	.
chr1	.	h1EM_EN_g6d3n6_DMR	7505901	7506200	1	.	300	.
chr1	.	h1EM_EN_g6d3n6_DMR	7522451	7522600	1	.	150	.
chr1	.	h1EM_EN_g6d3n6_DMR	7528051	7528150	1	.	100	.
chr1	.	h1EM_EN_g6d3n6_DMR	7541101	7541450	1	.	350	.
chr1	.	h1EM_EN_g6d3n6_DMR	7556301	7556400	1	.	100	.
chr1	.	h1EM_EN_g6d3n6_DMR	7665601	7665800	1	.	200	.
chr1	.	h1EM_EN_g6d3n6_DMR	7683101	7683350	1	.	250	.
chr1	.	h1EM_EN_g6d3n6_DMR	7709451	7712500	1	.	3050	.
chr1	.	h1EM_EN_g6d3n6_DMR	7724751	7725000	1	.	250	.
chr1	.	h1EM_EN_g6d3n6_DMR	7729901	7730150	1	.	250	.
chr1	.	h1EM_EN_g6d3n6_DMR	7748101	7748250	1	.	150	.
chr1	.	h1EM_EN_g6d3n6_DMR	7761351	7762100	1	.	750	.
chr1	.	h1EM_EN_g6d3n6_DMR	7764851	7765000	1	.	150	.
chr1	.	h1EM_EN_g6d3n6_DMR	7766201	7766500	1	.	300	.
chr1	.	h1EM_EN_g6d3n6_DMR	7773751	7774000	1	.	250	.
chr1	.	h1EM_EN_g6d3n6_DMR	7783251	7784100	1	.	850	.
chr1	.	h1EM_EN_g6d3n6_DMR	7787051	7787950	1	.	900	.
chr1	.	h1EM_EN_g6d3n6_DMR	7809951	7810400	1	.	450	.
chr1	.	h1EM_EN_g6d3n6_DMR	7811051	7811900	1	.	850	.
chr1	.	h1EM_EN_g6d3n6_DMR	7833151	7834000	1	.	850	.
chr1	.	h1EM_EN_g6d3n6_DMR	7845801	7846150	1	.	350	.
chr1	.	h1EM_EN_g6d3n6_DMR	7848401	7848650	1	.	250	.
chr1	.	h1EM_EN_g6d3n6_DMR	7851801	7852450	1	.	650	.
chr1	.	h1EM_EN_g6d3n6_DMR	7935701	7936000	1	.	300	.
chr1	.	h1EM_EN_g6d3n6_DMR	7959501	7961100	1	.	1600	.
chr1	.	h1EM_EN_g6d3n6_DMR	7975851	7976300	1	.	450	.
chr1	.	h1EM_EN_g6d3n6_DMR	7980901	7981350	1	.	450	.
chr1	.	h1EM_EN_g6d3n6_DMR	7985451	7986100	1	.	650	.
chr1	.	h1EM_EN_g6d3n6_DMR	8016401	8016600	1	.	200	.
chr1	.	h1EM_EN_g6d3n6_DMR	8035751	8036150	1	.	400	.
chr1	.	h1EM_EN_g6d3n6_DMR	8043851	8044250	1	.	400	.
chr1	.	h1EM_EN_g6d3n6_DMR	8053201	8053900	1	.	700	.
chr1	.	h1EM_EN_g6d3n6_DMR	8086751	8086850	1	.	100	.
chr1	.	h1EM_EN_g6d3n6_DMR	8115401	8115700	1	.	300	.
chr1	.	h1EM_EN_g6d3n6_DMR	8116651	8116850	1	.	200	.
chr1	.	h1EM_EN_g6d3n6_DMR	8154151	8154250	1	.	100	.
chr1	.	h1EM_EN_g6d3n6_DMR	8160051	8160550	1	.	500	.
chr1	.	h1EM_EN_g6d3n6_DMR	8169751	8170350	1	.	600	.
chr1	.	h1EM_EN_g6d3n6_DMR	8189851	8190450	1	.	600	.
chr1	.	h1EM_EN_g6d3n6_DMR	8204801	8205350	1	.	550	.
chr1	.	h1EM_EN_g6d3n6_DMR	8236101	8236400	1	.	300	.
chr1	.	h1EM_EN_g6d3n6_DMR	8236751	8237200	1	.	450	.
chr1	.	h1EM_EN_g6d3n6_DMR	8237551	8238450	1	.	900	.
chr1	.	h1EM_EN_g6d3n6_DMR	8239501	8239700	1	.	200	.
chr1	.	h1EM_EN_g6d3n6_DMR	8254951	8255100	1	.	150	.
chr1	.	h1EM_EN_g6d3n6_DMR	8257401	8257600	1	.	200	.
chr1	.	h1EM_EN_g6d3n6_DMR	8267051	8267200	1	.	150	.
chr1	.	h1EM_EN_g6d3n6_DMR	8272301	8272400	1	.	100	.
chr1	.	h1EM_EN_g6d3n6_DMR	8272751	8272950	1	.	200	.
chr1	.	h1EM_EN_g6d3n6_DMR	8275951	8276350	1	.	400	.
chr1	.	h1EM_EN_g6d3n6_DMR	8283401	8283600	1	.	200	.
chr1	.	h1EM_EN_g6d3n6_DMR	8287601	8288650	1	.	1050	.
chr1	.	h1EM_EN_g6d3n6_DMR	8290801	8291300	1	.	500	.
chr1	.	h1EM_EN_g6d3n6_DMR	8331801	8331900	1	.	100	.
chr1	.	h1EM_EN_g6d3n6_DMR	8334801	8334900	1	.	100	.
chr1	.	h1EM_EN_g6d3n6_DMR	8374451	8374550	1	.	100	.
chr1	.	h1EM_EN_g6d3n6_DMR	8374901	8375000	1	.	100	.
chr1	.	h1EM_EN_g6d3n6_DMR	8392001	8392550	1	.	550	.
chr1	.	h1EM_EN_g6d3n6_DMR	8409101	8409350	1	.	250	.
chr1	.	h1EM_EN_g6d3n6_DMR	8442301	8442550	1	.	250	.
chr1	.	h1EM_EN_g6d3n6_DMR	8473301	8473450	1	.	150	.
chr1	.	h1EM_EN_g6d3n6_DMR	8476251	8476350	1	.	100	.
chr1	.	h1EM_EN_g6d3n6_DMR	8476851	8477100	1	.	250	.
chr1	.	h1EM_EN_g6d3n6_DMR	8478101	8478250	1	.	150	.
chr1	.	h1EM_EN_g6d3n6_DMR	8488551	8488850	1	.	300	.
chr1	.	h1EM_EN_g6d3n6_DMR	8490351	8490750	1	.	400	.
chr1	.	h1EM_EN_g6d3n6_DMR	8495251	8495400	1	.	150	.
chr1	.	h1EM_EN_g6d3n6_DMR	8497301	8497400	1	.	100	.
chr1	.	h1EM_EN_g6d3n6_DMR	8512501	8512700	1	.	200	.
chr1	.	h1EM_EN_g6d3n6_DMR	8513351	8513800	1	.	450	.
chr1	.	h1EM_EN_g6d3n6_DMR	8539051	8539750	1	.	700	.
chr1	.	h1EM_EN_g6d3n6_DMR	8540451	8540600	1	.	150	.
chr1	.	h1EM_EN_g6d3n6_DMR	8543801	8543950	1	.	150	.
chr1	.	h1EM_EN_g6d3n6_DMR	8571151	8571300	1	.	150	.
chr1	.	h1EM_EN_g6d3n6_DMR	8573201	8573500	1	.	300	.
chr1	.	h1EM_EN_g6d3n6_DMR	8577051	8577650	1	.	600	.
chr1	.	h1EM_EN_g6d3n6_DMR	8591401	8591650	1	.	250	.
chr1	.	h1EM_EN_g6d3n6_DMR	8620951	8623700	1	.	2750	.
chr1	.	h1EM_EN_g6d3n6_DMR	8637151	8637250	1	.	100	.
chr1	.	h1EM_EN_g6d3n6_DMR	8643551	8643650	1	.	100	.
chr1	.	h1EM_EN_g6d3n6_DMR	8644651	8644900	1	.	250	.
chr1	.	h1EM_EN_g6d3n6_DMR	8646151	8647600	1	.	1450	.
chr1	.	h1EM_EN_g6d3n6_DMR	8648901	8649250	1	.	350	.
chr1	.	h1EM_EN_g6d3n6_DMR	8661301	8661400	1	.	100	.
chr1	.	h1EM_EN_g6d3n6_DMR	8681951	8682100	1	.	150	.
chr1	.	h1EM_EN_g6d3n6_DMR	8690301	8690600	1	.	300	.
chr1	.	h1EM_EN_g6d3n6_DMR	8723151	8723550	1	.	400	.
chr1	.	h1EM_EN_g6d3n6_DMR	8738001	8738750	1	.	750	.
chr1	.	h1EM_EN_g6d3n6_DMR	8740551	8741600	1	.	1050	.
chr1	.	h1EM_EN_g6d3n6_DMR	8764751	8764900	1	.	150	.
chr1	.	h1EM_EN_g6d3n6_DMR	8765551	8766350	1	.	800	.
chr1	.	h1EM_EN_g6d3n6_DMR	8774551	8775550	1	.	1000	.
chr1	.	h1EM_EN_g6d3n6_DMR	8779901	8780650	1	.	750	.
chr1	.	h1EM_EN_g6d3n6_DMR	8781001	8781100	1	.	100	.
chr1	.	h1EM_EN_g6d3n6_DMR	8788951	8789900	1	.	950	.
chr1	.	h1EM_EN_g6d3n6_DMR	8794751	8795400	1	.	650	.
chr1	.	h1EM_EN_g6d3n6_DMR	8802751	8803250	1	.	500	.
chr1	.	h1EM_EN_g6d3n6_DMR	8811451	8812450	1	.	1000	.
chr1	.	h1EM_EN_g6d3n6_DMR	8816201	8817150	1	.	950	.
chr1	.	h1EM_EN_g6d3n6_DMR	8817501	8817950	1	.	450	.
chr1	.	h1EM_EN_g6d3n6_DMR	8825851	8826850	1	.	1000	.
chr1	.	h1EM_EN_g6d3n6_DMR	8829451	8829550	1	.	100	.
chr1	.	h1EM_EN_g6d3n6_DMR	8830751	8831750	1	.	1000	.
chr1	.	h1EM_EN_g6d3n6_DMR	8832301	8832400	1	.	100	.
chr1	.	h1EM_EN_g6d3n6_DMR	8869801	8870350	1	.	550	.
chr1	.	h1EM_EN_g6d3n6_DMR	8891101	8891250	1	.	150	.
chr1	.	h1EM_EN_g6d3n6_DMR	8899301	8899800	1	.	500	.
chr1	.	h1EM_EN_g6d3n6_DMR	8905051	8905150	1	.	100	.
chr1	.	h1EM_EN_g6d3n6_DMR	8927701	8927800	1	.	100	.
chr1	.	h1EM_EN_g6d3n6_DMR	8936201	8936450	1	.	250	.
chr1	.	h1EM_EN_g6d3n6_DMR	9001051	9001200	1	.	150	.
chr1	.	h1EM_EN_g6d3n6_DMR	9004901	9005600	1	.	700	.
chr1	.	h1EM_EN_g6d3n6_DMR	9018251	9018800	1	.	550	.
chr1	.	h1EM_EN_g6d3n6_DMR	9019351	9019500	1	.	150	.
chr1	.	h1EM_EN_g6d3n6_DMR	9049951	9050200	1	.	250	.
chr1	.	h1EM_EN_g6d3n6_DMR	9082601	9082800	1	.	200	.
chr1	.	h1EM_EN_g6d3n6_DMR	9088401	9088500	1	.	100	.
chr1	.	h1EM_EN_g6d3n6_DMR	9098251	9098350	1	.	100	.
chr1	.	h1EM_EN_g6d3n6_DMR	9126101	9126800	1	.	700	.
chr1	.	h1EM_EN_g6d3n6_DMR	9135551	9136300	1	.	750	.
chr1	.	h1EM_EN_g6d3n6_DMR	9136651	9137200	1	.	550	.
chr1	.	h1EM_EN_g6d3n6_DMR	9137801	9138200	1	.	400	.
chr1	.	h1EM_EN_g6d3n6_DMR	9140851	9140950	1	.	100	.
chr1	.	h1EM_EN_g6d3n6_DMR	9146701	9146900	1	.	200	.
chr1	.	h1EM_EN_g6d3n6_DMR	9147901	9148150	1	.	250	.
chr1	.	h1EM_EN_g6d3n6_DMR	9173701	9173800	1	.	100	.
chr1	.	h1EM_EN_g6d3n6_DMR	9174251	9174550	1	.	300	.
chr1	.	h1EM_EN_g6d3n6_DMR	9187701	9188900	1	.	1200	.
chr1	.	h1EM_EN_g6d3n6_DMR	9200551	9201000	1	.	450	.
chr1	.	h1EM_EN_g6d3n6_DMR	9201601	9201800	1	.	200	.
chr1	.	h1EM_EN_g6d3n6_DMR	9204101	9205400	1	.	1300	.
chr1	.	h1EM_EN_g6d3n6_DMR	9235951	9236150	1	.	200	.
chr1	.	h1EM_EN_g6d3n6_DMR	9253851	9254050	1	.	200	.
chr1	.	h1EM_EN_g6d3n6_DMR	9283501	9283600	1	.	100	.
chr1	.	h1EM_EN_g6d3n6_DMR	9288201	9288300	1	.	100	.
chr1	.	h1EM_EN_g6d3n6_DMR	9304751	9305600	1	.	850	.
chr1	.	h1EM_EN_g6d3n6_DMR	9310251	9310450	1	.	200	.
chr1	.	h1EM_EN_g6d3n6_DMR	9344251	9344450	1	.	200	.
chr1	.	h1EM_EN_g6d3n6_DMR	9367501	9367800	1	.	300	.
chr1	.	h1EM_EN_g6d3n6_DMR	9373351	9373450	1	.	100	.
chr1	.	h1EM_EN_g6d3n6_DMR	9384151	9384850	1	.	700	.
chr1	.	h1EM_EN_g6d3n6_DMR	9385951	9386350	1	.	400	.
chr1	.	h1EM_EN_g6d3n6_DMR	9416801	9417150	1	.	350	.
chr1	.	h1EM_EN_g6d3n6_DMR	9418001	9418300	1	.	300	.
chr1	.	h1EM_EN_g6d3n6_DMR	9464751	9464900	1	.	150	.
chr1	.	h1EM_EN_g6d3n6_DMR	9491501	9491700	1	.	200	.
chr1	.	h1EM_EN_g6d3n6_DMR	9547101	9549000	1	.	1900	.
chr1	.	h1EM_EN_g6d3n6_DMR	9549401	9549800	1	.	400	.
chr1	.	h1EM_EN_g6d3n6_DMR	9550751	9551000	1	.	250	.
chr1	.	h1EM_EN_g6d3n6_DMR	9571801	9571900	1	.	100	.
chr1	.	h1EM_EN_g6d3n6_DMR	9572301	9572400	1	.	100	.
chr1	.	h1EM_EN_g6d3n6_DMR	9573301	9574350	1	.	1050	.
chr1	.	h1EM_EN_g6d3n6_DMR	9584301	9584850	1	.	550	.
chr1	.	h1EM_EN_g6d3n6_DMR	9585201	9585650	1	.	450	.
chr1	.	h1EM_EN_g6d3n6_DMR	9586001	9586200	1	.	200	.
chr1	.	h1EM_EN_g6d3n6_DMR	9587351	9587650	1	.	300	.
chr1	.	h1EM_EN_g6d3n6_DMR	9591551	9591650	1	.	100	.
chr1	.	h1EM_EN_g6d3n6_DMR	9626951	9627050	1	.	100	.
chr1	.	h1EM_EN_g6d3n6_DMR	9629751	9630750	1	.	1000	.
chr1	.	h1EM_EN_g6d3n6_DMR	9690601	9691250	1	.	650	.
chr1	.	h1EM_EN_g6d3n6_DMR	9708451	9708600	1	.	150	.
chr1	.	h1EM_EN_g6d3n6_DMR	9746401	9746550	1	.	150	.
chr1	.	h1EM_EN_g6d3n6_DMR	9754401	9756550	1	.	2150	.
chr1	.	h1EM_EN_g6d3n6_DMR	9758901	9759450	1	.	550	.
chr1	.	h1EM_EN_g6d3n6_DMR	9759901	9760400	1	.	500	.
chr1	.	h1EM_EN_g6d3n6_DMR	9762651	9762800	1	.	150	.
chr1	.	h1EM_EN_g6d3n6_DMR	9778401	9778600	1	.	200	.
chr1	.	h1EM_EN_g6d3n6_DMR	9811851	9812350	1	.	500	.
chr1	.	h1EM_EN_g6d3n6_DMR	9816551	9817750	1	.	1200	.
chr1	.	h1EM_EN_g6d3n6_DMR	9829251	9829350	1	.	100	.
chr1	.	h1EM_EN_g6d3n6_DMR	9836751	9837700	1	.	950	.
chr1	.	h1EM_EN_g6d3n6_DMR	9842651	9842750	1	.	100	.
chr1	.	h1EM_EN_g6d3n6_DMR	9852701	9853550	1	.	850	.
chr1	.	h1EM_EN_g6d3n6_DMR	9854051	9854250	1	.	200	.
chr1	.	h1EM_EN_g6d3n6_DMR	9855851	9856350	1	.	500	.
chr1	.	h1EM_EN_g6d3n6_DMR	9863001	9863300	1	.	300	.
chr1	.	h1EM_EN_g6d3n6_DMR	9865451	9867450	1	.	2000	.
chr1	.	h1EM_EN_g6d3n6_DMR	9879751	9879850	1	.	100	.
chr1	.	h1EM_EN_g6d3n6_DMR	9883801	9884100	1	.	300	.
chr1	.	h1EM_EN_g6d3n6_DMR	9900401	9901050	1	.	650	.
chr1	.	h1EM_EN_g6d3n6_DMR	9907201	9909750	1	.	2550	.
chr1	.	h1EM_EN_g6d3n6_DMR	9915251	9915500	1	.	250	.
chr1	.	h1EM_EN_g6d3n6_DMR	9918951	9919200	1	.	250	.
chr1	.	h1EM_EN_g6d3n6_DMR	9925301	9926150	1	.	850	.
chr1	.	h1EM_EN_g6d3n6_DMR	9926751	9926950	1	.	200	.
chr1	.	h1EM_EN_g6d3n6_DMR	9927551	9927650	1	.	100	.
chr1	.	h1EM_EN_g6d3n6_DMR	9928401	9928650	1	.	250	.
chr1	.	h1EM_EN_g6d3n6_DMR	9939251	9939600	1	.	350	.
chr1	.	h1EM_EN_g6d3n6_DMR	9955501	9955700	1	.	200	.
chr1	.	h1EM_EN_g6d3n6_DMR	9958351	9958750	1	.	400	.
chr1	.	h1EM_EN_g6d3n6_DMR	9999301	9999500	1	.	200	.
chr1	.	h1EM_EN_g6d3n6_DMR	10005801	10006000	1	.	200	.
chr1	.	h1EM_EN_g6d3n6_DMR	10006401	10006500	1	.	100	.
chr1	.	h1EM_EN_g6d3n6_DMR	10006901	10007650	1	.	750	.
chr1	.	h1EM_EN_g6d3n6_DMR	10008301	10008850	1	.	550	.
chr1	.	h1EM_EN_g6d3n6_DMR	10021401	10021550	1	.	150	.
chr1	.	h1EM_EN_g6d3n6_DMR	10022001	10022100	1	.	100	.
chr1	.	h1EM_EN_g6d3n6_DMR	10022551	10023600	1	.	1050	.
chr1	.	h1EM_EN_g6d3n6_DMR	10025501	10025700	1	.	200	.
chr1	.	h1EM_EN_g6d3n6_DMR	10027001	10027150	1	.	150	.
chr1	.	h1EM_EN_g6d3n6_DMR	10038651	10038750	1	.	100	.
chr1	.	h1EM_EN_g6d3n6_DMR	10060601	10060950	1	.	350	.
chr1	.	h1EM_EN_g6d3n6_DMR	10064951	10065100	1	.	150	.
chr1	.	h1EM_EN_g6d3n6_DMR	10089451	10089600	1	.	150	.
chr1	.	h1EM_EN_g6d3n6_DMR	10114601	10115350	1	.	750	.
chr1	.	h1EM_EN_g6d3n6_DMR	10152851	10153500	1	.	650	.
chr1	.	h1EM_EN_g6d3n6_DMR	10154401	10156650	1	.	2250	.
chr1	.	h1EM_EN_g6d3n6_DMR	10159051	10159600	1	.	550	.
chr1	.	h1EM_EN_g6d3n6_DMR	10161651	10161850	1	.	200	.
chr1	.	h1EM_EN_g6d3n6_DMR	10169851	10170150	1	.	300	.
chr1	.	h1EM_EN_g6d3n6_DMR	10186201	10186350	1	.	150	.
chr1	.	h1EM_EN_g6d3n6_DMR	10196251	10196600	1	.	350	.
chr1	.	h1EM_EN_g6d3n6_DMR	10206651	10207000	1	.	350	.
chr1	.	h1EM_EN_g6d3n6_DMR	10207551	10207650	1	.	100	.
chr1	.	h1EM_EN_g6d3n6_DMR	10222051	10222350	1	.	300	.
chr1	.	h1EM_EN_g6d3n6_DMR	10239501	10240000	1	.	500	.
chr1	.	h1EM_EN_g6d3n6_DMR	10278801	10278950	1	.	150	.
chr1	.	h1EM_EN_g6d3n6_DMR	10314501	10315600	1	.	1100	.
chr1	.	h1EM_EN_g6d3n6_DMR	10347151	10347250	1	.	100	.
chr1	.	h1EM_EN_g6d3n6_DMR	10349101	10349250	1	.	150	.
chr1	.	h1EM_EN_g6d3n6_DMR	10351451	10351800	1	.	350	.
chr1	.	h1EM_EN_g6d3n6_DMR	10352201	10352700	1	.	500	.
chr1	.	h1EM_EN_g6d3n6_DMR	10356901	10357200	1	.	300	.
chr1	.	h1EM_EN_g6d3n6_DMR	10383151	10384350	1	.	1200	.
chr1	.	h1EM_EN_g6d3n6_DMR	10421201	10421750	1	.	550	.
chr1	.	h1EM_EN_g6d3n6_DMR	10436151	10436250	1	.	100	.
chr1	.	h1EM_EN_g6d3n6_DMR	10443301	10443450	1	.	150	.
chr1	.	h1EM_EN_g6d3n6_DMR	10443851	10444200	1	.	350	.
chr1	.	h1EM_EN_g6d3n6_DMR	10460751	10460850	1	.	100	.
chr1	.	h1EM_EN_g6d3n6_DMR	10490401	10491050	1	.	650	.
chr1	.	h1EM_EN_g6d3n6_DMR	10497751	10497850	1	.	100	.
chr1	.	h1EM_EN_g6d3n6_DMR	10506551	10507350	1	.	800	.
chr1	.	h1EM_EN_g6d3n6_DMR	10512751	10512950	1	.	200	.
chr1	.	h1EM_EN_g6d3n6_DMR	10523551	10523700	1	.	150	.
chr1	.	h1EM_EN_g6d3n6_DMR	10525451	10525650	1	.	200	.
chr1	.	h1EM_EN_g6d3n6_DMR	10526501	10526900	1	.	400	.
chr1	.	h1EM_EN_g6d3n6_DMR	10527301	10527850	1	.	550	.
chr1	.	h1EM_EN_g6d3n6_DMR	10529151	10529650	1	.	500	.
chr1	.	h1EM_EN_g6d3n6_DMR	10531851	10531950	1	.	100	.
chr1	.	h1EM_EN_g6d3n6_DMR	10545901	10546200	1	.	300	.
chr1	.	h1EM_EN_g6d3n6_DMR	10554451	10554650	1	.	200	.
chr1	.	h1EM_EN_g6d3n6_DMR	10568551	10569000	1	.	450	.
chr1	.	h1EM_EN_g6d3n6_DMR	10570051	10570350	1	.	300	.
chr1	.	h1EM_EN_g6d3n6_DMR	10579351	10579500	1	.	150	.
chr1	.	h1EM_EN_g6d3n6_DMR	10591401	10592350	1	.	950	.
chr1	.	h1EM_EN_g6d3n6_DMR	10593351	10594400	1	.	1050	.
chr1	.	h1EM_EN_g6d3n6_DMR	10594751	10595450	1	.	700	.
chr1	.	h1EM_EN_g6d3n6_DMR	10597601	10598500	1	.	900	.
chr1	.	h1EM_EN_g6d3n6_DMR	10604751	10605250	1	.	500	.
chr1	.	h1EM_EN_g6d3n6_DMR	10623801	10624350	1	.	550	.
chr1	.	h1EM_EN_g6d3n6_DMR	10652451	10652950	1	.	500	.
chr1	.	h1EM_EN_g6d3n6_DMR	10654451	10654550	1	.	100	.
chr1	.	h1EM_EN_g6d3n6_DMR	10660551	10661200	1	.	650	.
chr1	.	h1EM_EN_g6d3n6_DMR	10702601	10703050	1	.	450	.
chr1	.	h1EM_EN_g6d3n6_DMR	10776201	10777500	1	.	1300	.
chr1	.	h1EM_EN_g6d3n6_DMR	10778101	10778850	1	.	750	.
chr1	.	h1EM_EN_g6d3n6_DMR	10801301	10801500	1	.	200	.
chr1	.	h1EM_EN_g6d3n6_DMR	10802551	10803200	1	.	650	.
chr1	.	h1EM_EN_g6d3n6_DMR	10814251	10814500	1	.	250	.
chr1	.	h1EM_EN_g6d3n6_DMR	10841551	10841700	1	.	150	.
chr1	.	h1EM_EN_g6d3n6_DMR	10847901	10848000	1	.	100	.
chr1	.	h1EM_EN_g6d3n6_DMR	10848551	10848700	1	.	150	.
chr1	.	h1EM_EN_g6d3n6_DMR	10862151	10862500	1	.	350	.
chr1	.	h1EM_EN_g6d3n6_DMR	10867051	10867800	1	.	750	.
chr1	.	h1EM_EN_g6d3n6_DMR	10880801	10880900	1	.	100	.
chr1	.	h1EM_EN_g6d3n6_DMR	10883851	10884050	1	.	200	.
chr1	.	h1EM_EN_g6d3n6_DMR	10920801	10921200	1	.	400	.
chr1	.	h1EM_EN_g6d3n6_DMR	10922201	10922400	1	.	200	.
chr1	.	h1EM_EN_g6d3n6_DMR	10930001	10930300	1	.	300	.
chr1	.	h1EM_EN_g6d3n6_DMR	10931551	10932650	1	.	1100	.
chr1	.	h1EM_EN_g6d3n6_DMR	10964551	10964850	1	.	300	.
chr1	.	h1EM_EN_g6d3n6_DMR	10965901	10966300	1	.	400	.
chr1	.	h1EM_EN_g6d3n6_DMR	10971601	10971800	1	.	200	.
chr1	.	h1EM_EN_g6d3n6_DMR	10983401	10983600	1	.	200	.
chr1	.	h1EM_EN_g6d3n6_DMR	11006301	11006650	1	.	350	.
chr1	.	h1EM_EN_g6d3n6_DMR	11016101	11016500	1	.	400	.
chr1	.	h1EM_EN_g6d3n6_DMR	11019451	11020300	1	.	850	.
chr1	.	h1EM_EN_g6d3n6_DMR	11020701	11021500	1	.	800	.
chr1	.	h1EM_EN_g6d3n6_DMR	11027501	11028450	1	.	950	.
chr1	.	h1EM_EN_g6d3n6_DMR	11032101	11032600	1	.	500	.
chr1	.	h1EM_EN_g6d3n6_DMR	11044501	11045550	1	.	1050	.
chr1	.	h1EM_EN_g6d3n6_DMR	11046401	11049550	1	.	3150	.
chr1	.	h1EM_EN_g6d3n6_DMR	11050551	11051400	1	.	850	.
chr1	.	h1EM_EN_g6d3n6_DMR	11088801	11088950	1	.	150	.
chr1	.	h1EM_EN_g6d3n6_DMR	11089451	11090600	1	.	1150	.
chr1	.	h1EM_EN_g6d3n6_DMR	11093751	11094050	1	.	300	.
chr1	.	h1EM_EN_g6d3n6_DMR	11097001	11097100	1	.	100	.
chr1	.	h1EM_EN_g6d3n6_DMR	11106301	11106800	1	.	500	.
chr1	.	h1EM_EN_g6d3n6_DMR	11111151	11111450	1	.	300	.
chr1	.	h1EM_EN_g6d3n6_DMR	11111901	11112050	1	.	150	.
chr1	.	h1EM_EN_g6d3n6_DMR	11125751	11126200	1	.	450	.
chr1	.	h1EM_EN_g6d3n6_DMR	11127501	11128300	1	.	800	.
chr1	.	h1EM_EN_g6d3n6_DMR	11131751	11132600	1	.	850	.
chr1	.	h1EM_EN_g6d3n6_DMR	11140101	11140300	1	.	200	.
chr1	.	h1EM_EN_g6d3n6_DMR	11152851	11154750	1	.	1900	.
chr1	.	h1EM_EN_g6d3n6_DMR	11156351	11156600	1	.	250	.
chr1	.	h1EM_EN_g6d3n6_DMR	11166751	11167000	1	.	250	.
chr1	.	h1EM_EN_g6d3n6_DMR	11174301	11174950	1	.	650	.
chr1	.	h1EM_EN_g6d3n6_DMR	11208801	11209250	1	.	450	.
chr1	.	h1EM_EN_g6d3n6_DMR	11212451	11212550	1	.	100	.
chr1	.	h1EM_EN_g6d3n6_DMR	11241601	11242150	1	.	550	.
chr1	.	h1EM_EN_g6d3n6_DMR	11259051	11259700	1	.	650	.
chr1	.	h1EM_EN_g6d3n6_DMR	11268201	11268450	1	.	250	.
chr1	.	h1EM_EN_g6d3n6_DMR	11283351	11283650	1	.	300	.
chr1	.	h1EM_EN_g6d3n6_DMR	11284851	11284950	1	.	100	.
chr1	.	h1EM_EN_g6d3n6_DMR	11298801	11298950	1	.	150	.
chr1	.	h1EM_EN_g6d3n6_DMR	11299301	11299450	1	.	150	.
chr1	.	h1EM_EN_g6d3n6_DMR	11301001	11301650	1	.	650	.
chr1	.	h1EM_EN_g6d3n6_DMR	11302251	11302600	1	.	350	.
chr1	.	h1EM_EN_g6d3n6_DMR	11312301	11312550	1	.	250	.
chr1	.	h1EM_EN_g6d3n6_DMR	11334151	11334450	1	.	300	.
chr1	.	h1EM_EN_g6d3n6_DMR	11351501	11352450	1	.	950	.
chr1	.	h1EM_EN_g6d3n6_DMR	11353251	11353350	1	.	100	.
chr1	.	h1EM_EN_g6d3n6_DMR	11366001	11368950	1	.	2950	.
chr1	.	h1EM_EN_g6d3n6_DMR	11369351	11370850	1	.	1500	.
chr1	.	h1EM_EN_g6d3n6_DMR	11371401	11371550	1	.	150	.
chr1	.	h1EM_EN_g6d3n6_DMR	11378151	11378300	1	.	150	.
chr1	.	h1EM_EN_g6d3n6_DMR	11384901	11385150	1	.	250	.
chr1	.	h1EM_EN_g6d3n6_DMR	11400001	11400250	1	.	250	.
chr1	.	h1EM_EN_g6d3n6_DMR	11407951	11408550	1	.	600	.
chr1	.	h1EM_EN_g6d3n6_DMR	11409151	11409300	1	.	150	.
chr1	.	h1EM_EN_g6d3n6_DMR	11409851	11410200	1	.	350	.
chr1	.	h1EM_EN_g6d3n6_DMR	11421201	11421300	1	.	100	.
chr1	.	h1EM_EN_g6d3n6_DMR	11427851	11428100	1	.	250	.
chr1	.	h1EM_EN_g6d3n6_DMR	11440901	11441550	1	.	650	.
chr1	.	h1EM_EN_g6d3n6_DMR	11452051	11453050	1	.	1000	.
chr1	.	h1EM_EN_g6d3n6_DMR	11456501	11456650	1	.	150	.
chr1	.	h1EM_EN_g6d3n6_DMR	11465951	11467300	1	.	1350	.
chr1	.	h1EM_EN_g6d3n6_DMR	11486101	11486250	1	.	150	.
chr1	.	h1EM_EN_g6d3n6_DMR	11489001	11489150	1	.	150	.
chr1	.	h1EM_EN_g6d3n6_DMR	11489801	11490900	1	.	1100	.
chr1	.	h1EM_EN_g6d3n6_DMR	11496551	11497000	1	.	450	.
chr1	.	h1EM_EN_g6d3n6_DMR	11517201	11518150	1	.	950	.
chr1	.	h1EM_EN_g6d3n6_DMR	11525551	11526150	1	.	600	.
chr1	.	h1EM_EN_g6d3n6_DMR	11526501	11527400	1	.	900	.
chr1	.	h1EM_EN_g6d3n6_DMR	11530151	11530350	1	.	200	.
chr1	.	h1EM_EN_g6d3n6_DMR	11537051	11537150	1	.	100	.
chr1	.	h1EM_EN_g6d3n6_DMR	11552001	11552300	1	.	300	.
chr1	.	h1EM_EN_g6d3n6_DMR	11567301	11567400	1	.	100	.
chr1	.	h1EM_EN_g6d3n6_DMR	11585851	11586300	1	.	450	.
chr1	.	h1EM_EN_g6d3n6_DMR	11611501	11611600	1	.	100	.
chr1	.	h1EM_EN_g6d3n6_DMR	11617451	11619300	1	.	1850	.
chr1	.	h1EM_EN_g6d3n6_DMR	11632051	11632250	1	.	200	.
chr1	.	h1EM_EN_g6d3n6_DMR	11636301	11637750	1	.	1450	.
chr1	.	h1EM_EN_g6d3n6_DMR	11643201	11643350	1	.	150	.
chr1	.	h1EM_EN_g6d3n6_DMR	11648251	11648900	1	.	650	.
chr1	.	h1EM_EN_g6d3n6_DMR	11649251	11649900	1	.	650	.
chr1	.	h1EM_EN_g6d3n6_DMR	11656701	11656900	1	.	200	.
chr1	.	h1EM_EN_g6d3n6_DMR	11660851	11662250	1	.	1400	.
chr1	.	h1EM_EN_g6d3n6_DMR	11666301	11667050	1	.	750	.
chr1	.	h1EM_EN_g6d3n6_DMR	11669351	11669700	1	.	350	.
chr1	.	h1EM_EN_g6d3n6_DMR	11686201	11686600	1	.	400	.
chr1	.	h1EM_EN_g6d3n6_DMR	11687001	11687150	1	.	150	.
chr1	.	h1EM_EN_g6d3n6_DMR	11692201	11693450	1	.	1250	.
chr1	.	h1EM_EN_g6d3n6_DMR	11700101	11700400	1	.	300	.
chr1	.	h1EM_EN_g6d3n6_DMR	11700801	11701000	1	.	200	.
chr1	.	h1EM_EN_g6d3n6_DMR	11706501	11706900	1	.	400	.
chr1	.	h1EM_EN_g6d3n6_DMR	11710901	11711550	1	.	650	.
chr1	.	h1EM_EN_g6d3n6_DMR	11716401	11716600	1	.	200	.
chr1	.	h1EM_EN_g6d3n6_DMR	11720501	11721200	1	.	700	.
chr1	.	h1EM_EN_g6d3n6_DMR	11721601	11722450	1	.	850	.
chr1	.	h1EM_EN_g6d3n6_DMR	11732501	11734800	1	.	2300	.
chr1	.	h1EM_EN_g6d3n6_DMR	11735551	11736900	1	.	1350	.
chr1	.	h1EM_EN_g6d3n6_DMR	11740651	11740800	1	.	150	.
chr1	.	h1EM_EN_g6d3n6_DMR	11752251	11753150	1	.	900	.
chr1	.	h1EM_EN_g6d3n6_DMR	11754601	11755000	1	.	400	.
chr1	.	h1EM_EN_g6d3n6_DMR	11761351	11761450	1	.	100	.
chr1	.	h1EM_EN_g6d3n6_DMR	11777701	11778150	1	.	450	.
chr1	.	h1EM_EN_g6d3n6_DMR	11782401	11782700	1	.	300	.
chr1	.	h1EM_EN_g6d3n6_DMR	11783251	11783500	1	.	250	.
chr1	.	h1EM_EN_g6d3n6_DMR	11789401	11789600	1	.	200	.
chr1	.	h1EM_EN_g6d3n6_DMR	11793851	11793950	1	.	100	.
chr1	.	h1EM_EN_g6d3n6_DMR	11803501	11804150	1	.	650	.
chr1	.	h1EM_EN_g6d3n6_DMR	11805751	11806750	1	.	1000	.
chr1	.	h1EM_EN_g6d3n6_DMR	11807601	11808250	1	.	650	.
chr1	.	h1EM_EN_g6d3n6_DMR	11817051	11817800	1	.	750	.
chr1	.	h1EM_EN_g6d3n6_DMR	11822251	11822500	1	.	250	.
chr1	.	h1EM_EN_g6d3n6_DMR	11823701	11823950	1	.	250	.
chr1	.	h1EM_EN_g6d3n6_DMR	11831951	11832450	1	.	500	.
chr1	.	h1EM_EN_g6d3n6_DMR	11836851	11837100	1	.	250	.
chr1	.	h1EM_EN_g6d3n6_DMR	11839101	11839850	1	.	750	.
chr1	.	h1EM_EN_g6d3n6_DMR	11857051	11857650	1	.	600	.
chr1	.	h1EM_EN_g6d3n6_DMR	11859551	11859900	1	.	350	.
chr1	.	h1EM_EN_g6d3n6_DMR	11861151	11861500	1	.	350	.
chr1	.	h1EM_EN_g6d3n6_DMR	11879851	11880900	1	.	1050	.
chr1	.	h1EM_EN_g6d3n6_DMR	11888051	11888200	1	.	150	.
chr1	.	h1EM_EN_g6d3n6_DMR	11892651	11893400	1	.	750	.
chr1	.	h1EM_EN_g6d3n6_DMR	11893751	11894200	1	.	450	.
chr1	.	h1EM_EN_g6d3n6_DMR	11901701	11902100	1	.	400	.
chr1	.	h1EM_EN_g6d3n6_DMR	11910151	11910300	1	.	150	.
chr1	.	h1EM_EN_g6d3n6_DMR	11910851	11911100	1	.	250	.
chr1	.	h1EM_EN_g6d3n6_DMR	11935101	11935950	1	.	850	.
chr1	.	h1EM_EN_g6d3n6_DMR	11958451	11959100	1	.	650	.
chr1	.	h1EM_EN_g6d3n6_DMR	11961451	11961700	1	.	250	.
chr1	.	h1EM_EN_g6d3n6_DMR	11974801	11975050	1	.	250	.
chr1	.	h1EM_EN_g6d3n6_DMR	11979801	11981400	1	.	1600	.
chr1	.	h1EM_EN_g6d3n6_DMR	11987701	11988050	1	.	350	.
chr1	.	h1EM_EN_g6d3n6_DMR	11991951	11992650	1	.	700	.
chr1	.	h1EM_EN_g6d3n6_DMR	11998201	11998750	1	.	550	.
chr1	.	h1EM_EN_g6d3n6_DMR	12003501	12004300	1	.	800	.
chr1	.	h1EM_EN_g6d3n6_DMR	12009201	12010050	1	.	850	.
chr1	.	h1EM_EN_g6d3n6_DMR	12012551	12013250	1	.	700	.
chr1	.	h1EM_EN_g6d3n6_DMR	12014251	12015900	1	.	1650	.
chr1	.	h1EM_EN_g6d3n6_DMR	12019651	12020150	1	.	500	.
chr1	.	h1EM_EN_g6d3n6_DMR	12021451	12022500	1	.	1050	.
chr1	.	h1EM_EN_g6d3n6_DMR	12032001	12032650	1	.	650	.
chr1	.	h1EM_EN_g6d3n6_DMR	12033001	12035200	1	.	2200	.
chr1	.	h1EM_EN_g6d3n6_DMR	12035651	12035800	1	.	150	.
chr1	.	h1EM_EN_g6d3n6_DMR	12037751	12039250	1	.	1500	.
chr1	.	h1EM_EN_g6d3n6_DMR	12039601	12040400	1	.	800	.
chr1	.	h1EM_EN_g6d3n6_DMR	12041051	12042350	1	.	1300	.
chr1	.	h1EM_EN_g6d3n6_DMR	12050251	12050400	1	.	150	.
chr1	.	h1EM_EN_g6d3n6_DMR	12059951	12060550	1	.	600	.
chr1	.	h1EM_EN_g6d3n6_DMR	12062251	12063200	1	.	950	.
chr1	.	h1EM_EN_g6d3n6_DMR	12063551	12063650	1	.	100	.
chr1	.	h1EM_EN_g6d3n6_DMR	12070701	12071600	1	.	900	.
chr1	.	h1EM_EN_g6d3n6_DMR	12078351	12079250	1	.	900	.
chr1	.	h1EM_EN_g6d3n6_DMR	12083601	12084500	1	.	900	.
chr1	.	h1EM_EN_g6d3n6_DMR	12097101	12098000	1	.	900	.
chr1	.	h1EM_EN_g6d3n6_DMR	12130901	12131700	1	.	800	.
chr1	.	h1EM_EN_g6d3n6_DMR	12133101	12133400	1	.	300	.
chr1	.	h1EM_EN_g6d3n6_DMR	12136601	12137550	1	.	950	.
chr1	.	h1EM_EN_g6d3n6_DMR	12166751	12167150	1	.	400	.
chr1	.	h1EM_EN_g6d3n6_DMR	12172501	12172700	1	.	200	.
chr1	.	h1EM_EN_g6d3n6_DMR	12183301	12183850	1	.	550	.
chr1	.	h1EM_EN_g6d3n6_DMR	12184651	12185250	1	.	600	.
chr1	.	h1EM_EN_g6d3n6_DMR	12186301	12187300	1	.	1000	.
chr1	.	h1EM_EN_g6d3n6_DMR	12225551	12225900	1	.	350	.
chr1	.	h1EM_EN_g6d3n6_DMR	12228801	12228900	1	.	100	.
chr1	.	h1EM_EN_g6d3n6_DMR	12230951	12231350	1	.	400	.
chr1	.	h1EM_EN_g6d3n6_DMR	12240651	12240950	1	.	300	.
chr1	.	h1EM_EN_g6d3n6_DMR	12247301	12247800	1	.	500	.
chr1	.	h1EM_EN_g6d3n6_DMR	12255651	12255750	1	.	100	.
chr1	.	h1EM_EN_g6d3n6_DMR	12257701	12257950	1	.	250	.
chr1	.	h1EM_EN_g6d3n6_DMR	12264601	12264750	1	.	150	.
chr1	.	h1EM_EN_g6d3n6_DMR	12270201	12270450	1	.	250	.
chr1	.	h1EM_EN_g6d3n6_DMR	12272001	12272550	1	.	550	.
chr1	.	h1EM_EN_g6d3n6_DMR	12277401	12277500	1	.	100	.
chr1	.	h1EM_EN_g6d3n6_DMR	12281651	12281750	1	.	100	.
chr1	.	h1EM_EN_g6d3n6_DMR	12287001	12287500	1	.	500	.
chr1	.	h1EM_EN_g6d3n6_DMR	12289651	12290000	1	.	350	.
chr1	.	h1EM_EN_g6d3n6_DMR	12290651	12291600	1	.	950	.
chr1	.	h1EM_EN_g6d3n6_DMR	12297901	12301100	1	.	3200	.
chr1	.	h1EM_EN_g6d3n6_DMR	12302851	12302950	1	.	100	.
chr1	.	h1EM_EN_g6d3n6_DMR	12305901	12306200	1	.	300	.
chr1	.	h1EM_EN_g6d3n6_DMR	12306551	12307450	1	.	900	.
chr1	.	h1EM_EN_g6d3n6_DMR	12310501	12310950	1	.	450	.
chr1	.	h1EM_EN_g6d3n6_DMR	12317351	12318350	1	.	1000	.
chr1	.	h1EM_EN_g6d3n6_DMR	12320301	12320400	1	.	100	.
chr1	.	h1EM_EN_g6d3n6_DMR	12324751	12325650	1	.	900	.
chr1	.	h1EM_EN_g6d3n6_DMR	12328251	12328900	1	.	650	.
chr1	.	h1EM_EN_g6d3n6_DMR	12329301	12329650	1	.	350	.
chr1	.	h1EM_EN_g6d3n6_DMR	12333651	12333950	1	.	300	.
chr1	.	h1EM_EN_g6d3n6_DMR	12334901	12335100	1	.	200	.
chr1	.	h1EM_EN_g6d3n6_DMR	12335951	12336700	1	.	750	.
chr1	.	h1EM_EN_g6d3n6_DMR	12341801	12342250	1	.	450	.
chr1	.	h1EM_EN_g6d3n6_DMR	12346901	12347050	1	.	150	.
chr1	.	h1EM_EN_g6d3n6_DMR	12362551	12363100	1	.	550	.
chr1	.	h1EM_EN_g6d3n6_DMR	12364001	12364100	1	.	100	.
chr1	.	h1EM_EN_g6d3n6_DMR	12364501	12364600	1	.	100	.
chr1	.	h1EM_EN_g6d3n6_DMR	12365051	12366300	1	.	1250	.
chr1	.	h1EM_EN_g6d3n6_DMR	12372701	12372850	1	.	150	.
chr1	.	h1EM_EN_g6d3n6_DMR	12376451	12376650	1	.	200	.
chr1	.	h1EM_EN_g6d3n6_DMR	12380651	12380800	1	.	150	.
chr1	.	h1EM_EN_g6d3n6_DMR	12387801	12388100	1	.	300	.
chr1	.	h1EM_EN_g6d3n6_DMR	12391451	12391550	1	.	100	.
chr1	.	h1EM_EN_g6d3n6_DMR	12401301	12401550	1	.	250	.
chr1	.	h1EM_EN_g6d3n6_DMR	12425551	12425700	1	.	150	.
chr1	.	h1EM_EN_g6d3n6_DMR	12426201	12426600	1	.	400	.
chr1	.	h1EM_EN_g6d3n6_DMR	12435101	12435450	1	.	350	.
chr1	.	h1EM_EN_g6d3n6_DMR	12440201	12440650	1	.	450	.
chr1	.	h1EM_EN_g6d3n6_DMR	12443751	12444200	1	.	450	.
chr1	.	h1EM_EN_g6d3n6_DMR	12444601	12446500	1	.	1900	.
chr1	.	h1EM_EN_g6d3n6_DMR	12458001	12458300	1	.	300	.
chr1	.	h1EM_EN_g6d3n6_DMR	12466301	12467900	1	.	1600	.
chr1	.	h1EM_EN_g6d3n6_DMR	12468751	12469950	1	.	1200	.
chr1	.	h1EM_EN_g6d3n6_DMR	12470951	12471600	1	.	650	.
chr1	.	h1EM_EN_g6d3n6_DMR	12472651	12472750	1	.	100	.
chr1	.	h1EM_EN_g6d3n6_DMR	12475451	12475750	1	.	300	.
chr1	.	h1EM_EN_g6d3n6_DMR	12476651	12477550	1	.	900	.
chr1	.	h1EM_EN_g6d3n6_DMR	12477951	12478050	1	.	100	.
chr1	.	h1EM_EN_g6d3n6_DMR	12479401	12479500	1	.	100	.
chr1	.	h1EM_EN_g6d3n6_DMR	12483001	12483450	1	.	450	.
chr1	.	h1EM_EN_g6d3n6_DMR	12497301	12497450	1	.	150	.
chr1	.	h1EM_EN_g6d3n6_DMR	12498101	12500450	1	.	2350	.
chr1	.	h1EM_EN_g6d3n6_DMR	12504251	12504350	1	.	100	.
chr1	.	h1EM_EN_g6d3n6_DMR	12507001	12507100	1	.	100	.
chr1	.	h1EM_EN_g6d3n6_DMR	12507851	12512600	1	.	4750	.
chr1	.	h1EM_EN_g6d3n6_DMR	12513051	12513300	1	.	250	.
chr1	.	h1EM_EN_g6d3n6_DMR	12517301	12518350	1	.	1050	.
chr1	.	h1EM_EN_g6d3n6_DMR	12519651	12519850	1	.	200	.
chr1	.	h1EM_EN_g6d3n6_DMR	12525101	12527650	1	.	2550	.
chr1	.	h1EM_EN_g6d3n6_DMR	12529851	12530350	1	.	500	.
chr1	.	h1EM_EN_g6d3n6_DMR	12533401	12533600	1	.	200	.
chr1	.	h1EM_EN_g6d3n6_DMR	12548101	12548350	1	.	250	.
chr1	.	h1EM_EN_g6d3n6_DMR	12549401	12549700	1	.	300	.
chr1	.	h1EM_EN_g6d3n6_DMR	12554751	12558550	1	.	3800	.
chr1	.	h1EM_EN_g6d3n6_DMR	12558901	12559700	1	.	800	.
chr1	.	h1EM_EN_g6d3n6_DMR	12560051	12560300	1	.	250	.
chr1	.	h1EM_EN_g6d3n6_DMR	12562201	12562350	1	.	150	.
chr1	.	h1EM_EN_g6d3n6_DMR	12562701	12563100	1	.	400	.
chr1	.	h1EM_EN_g6d3n6_DMR	12563551	12563700	1	.	150	.
chr1	.	h1EM_EN_g6d3n6_DMR	12564051	12564250	1	.	200	.
chr1	.	h1EM_EN_g6d3n6_DMR	12565601	12565800	1	.	200	.
chr1	.	h1EM_EN_g6d3n6_DMR	12573451	12573700	1	.	250	.
chr1	.	h1EM_EN_g6d3n6_DMR	12574501	12574900	1	.	400	.
chr1	.	h1EM_EN_g6d3n6_DMR	12576501	12576650	1	.	150	.
chr1	.	h1EM_EN_g6d3n6_DMR	12577001	12577150	1	.	150	.
chr1	.	h1EM_EN_g6d3n6_DMR	12577601	12579000	1	.	1400	.
chr1	.	h1EM_EN_g6d3n6_DMR	12579351	12581800	1	.	2450	.
chr1	.	h1EM_EN_g6d3n6_DMR	12590751	12592050	1	.	1300	.
chr1	.	h1EM_EN_g6d3n6_DMR	12592451	12594800	1	.	2350	.
chr1	.	h1EM_EN_g6d3n6_DMR	12602151	12602250	1	.	100	.
chr1	.	h1EM_EN_g6d3n6_DMR	12603751	12604050	1	.	300	.
chr1	.	h1EM_EN_g6d3n6_DMR	12610751	12611150	1	.	400	.
chr1	.	h1EM_EN_g6d3n6_DMR	12614301	12615450	1	.	1150	.
chr1	.	h1EM_EN_g6d3n6_DMR	12618501	12619500	1	.	1000	.
chr1	.	h1EM_EN_g6d3n6_DMR	12620601	12621250	1	.	650	.
chr1	.	h1EM_EN_g6d3n6_DMR	12626501	12626650	1	.	150	.
chr1	.	h1EM_EN_g6d3n6_DMR	12630651	12632400	1	.	1750	.
chr1	.	h1EM_EN_g6d3n6_DMR	12633001	12633300	1	.	300	.
chr1	.	h1EM_EN_g6d3n6_DMR	12635351	12635450	1	.	100	.
chr1	.	h1EM_EN_g6d3n6_DMR	12635801	12636700	1	.	900	.
chr1	.	h1EM_EN_g6d3n6_DMR	12640701	12640950	1	.	250	.
chr1	.	h1EM_EN_g6d3n6_DMR	12641851	12642100	1	.	250	.
chr1	.	h1EM_EN_g6d3n6_DMR	12642501	12642650	1	.	150	.
chr1	.	h1EM_EN_g6d3n6_DMR	12643101	12644000	1	.	900	.
chr1	.	h1EM_EN_g6d3n6_DMR	12645051	12645300	1	.	250	.
chr1	.	h1EM_EN_g6d3n6_DMR	12662601	12662950	1	.	350	.
chr1	.	h1EM_EN_g6d3n6_DMR	12684051	12684900	1	.	850	.
chr1	.	h1EM_EN_g6d3n6_DMR	12688801	12689050	1	.	250	.
chr1	.	h1EM_EN_g6d3n6_DMR	12691401	12692650	1	.	1250	.
chr1	.	h1EM_EN_g6d3n6_DMR	12693001	12693250	1	.	250	.
chr1	.	h1EM_EN_g6d3n6_DMR	12695251	12695400	1	.	150	.
chr1	.	h1EM_EN_g6d3n6_DMR	12698501	12699550	1	.	1050	.
chr1	.	h1EM_EN_g6d3n6_DMR	12699901	12700100	1	.	200	.
chr1	.	h1EM_EN_g6d3n6_DMR	12701301	12701550	1	.	250	.
chr1	.	h1EM_EN_g6d3n6_DMR	12702201	12702550	1	.	350	.
chr1	.	h1EM_EN_g6d3n6_DMR	12703801	12704000	1	.	200	.
chr1	.	h1EM_EN_g6d3n6_DMR	12713551	12713950	1	.	400	.
chr1	.	h1EM_EN_g6d3n6_DMR	12729101	12729550	1	.	450	.
chr1	.	h1EM_EN_g6d3n6_DMR	12732701	12735150	1	.	2450	.
chr1	.	h1EM_EN_g6d3n6_DMR	12736801	12736900	1	.	100	.
chr1	.	h1EM_EN_g6d3n6_DMR	12738301	12739150	1	.	850	.
chr1	.	h1EM_EN_g6d3n6_DMR	12739751	12740000	1	.	250	.
chr1	.	h1EM_EN_g6d3n6_DMR	12741701	12741900	1	.	200	.
chr1	.	h1EM_EN_g6d3n6_DMR	12742401	12742950	1	.	550	.
chr1	.	h1EM_EN_g6d3n6_DMR	12752851	12753450	1	.	600	.
chr1	.	h1EM_EN_g6d3n6_DMR	12760851	12762000	1	.	1150	.
chr1	.	h1EM_EN_g6d3n6_DMR	12765251	12765650	1	.	400	.
chr1	.	h1EM_EN_g6d3n6_DMR	12766251	12767000	1	.	750	.
chr1	.	h1EM_EN_g6d3n6_DMR	12769451	12769700	1	.	250	.
chr1	.	h1EM_EN_g6d3n6_DMR	12771901	12772450	1	.	550	.
chr1	.	h1EM_EN_g6d3n6_DMR	12772901	12773700	1	.	800	.
chr1	.	h1EM_EN_g6d3n6_DMR	12775701	12775850	1	.	150	.
chr1	.	h1EM_EN_g6d3n6_DMR	12776301	12777150	1	.	850	.
chr1	.	h1EM_EN_g6d3n6_DMR	12778651	12779250	1	.	600	.
chr1	.	h1EM_EN_g6d3n6_DMR	12779801	12779900	1	.	100	.
chr1	.	h1EM_EN_g6d3n6_DMR	12783201	12783450	1	.	250	.
chr1	.	h1EM_EN_g6d3n6_DMR	12785551	12785950	1	.	400	.
chr1	.	h1EM_EN_g6d3n6_DMR	12789151	12789500	1	.	350	.
chr1	.	h1EM_EN_g6d3n6_DMR	12790051	12790400	1	.	350	.
chr1	.	h1EM_EN_g6d3n6_DMR	12792351	12792450	1	.	100	.
chr1	.	h1EM_EN_g6d3n6_DMR	12796001	12796350	1	.	350	.
chr1	.	h1EM_EN_g6d3n6_DMR	12799301	12799650	1	.	350	.
chr1	.	h1EM_EN_g6d3n6_DMR	12800751	12800850	1	.	100	.
chr1	.	h1EM_EN_g6d3n6_DMR	12802651	12803000	1	.	350	.
chr1	.	h1EM_EN_g6d3n6_DMR	12803451	12804450	1	.	1000	.
chr1	.	h1EM_EN_g6d3n6_DMR	12806051	12806400	1	.	350	.
chr1	.	h1EM_EN_g6d3n6_DMR	12806851	12808100	1	.	1250	.
chr1	.	h1EM_EN_g6d3n6_DMR	12809251	12810300	1	.	1050	.
chr1	.	h1EM_EN_g6d3n6_DMR	12811001	12811200	1	.	200	.
chr1	.	h1EM_EN_g6d3n6_DMR	12818301	12818500	1	.	200	.
chr1	.	h1EM_EN_g6d3n6_DMR	12819101	12819300	1	.	200	.
chr1	.	h1EM_EN_g6d3n6_DMR	12822851	12824700	1	.	1850	.
chr1	.	h1EM_EN_g6d3n6_DMR	12828301	12828700	1	.	400	.
chr1	.	h1EM_EN_g6d3n6_DMR	12845501	12847350	1	.	1850	.
chr1	.	h1EM_EN_g6d3n6_DMR	12851201	12851350	1	.	150	.
chr1	.	h1EM_EN_g6d3n6_DMR	12855101	12855700	1	.	600	.
chr1	.	h1EM_EN_g6d3n6_DMR	12861901	12863300	1	.	1400	.
chr1	.	h1EM_EN_g6d3n6_DMR	12869101	12869500	1	.	400	.
chr1	.	h1EM_EN_g6d3n6_DMR	12870101	12870450	1	.	350	.
chr1	.	h1EM_EN_g6d3n6_DMR	12873501	12875100	1	.	1600	.
chr1	.	h1EM_EN_g6d3n6_DMR	12875451	12876800	1	.	1350	.
chr1	.	h1EM_EN_g6d3n6_DMR	12883101	12883200	1	.	100	.
chr1	.	h1EM_EN_g6d3n6_DMR	12885001	12885400	1	.	400	.
chr1	.	h1EM_EN_g6d3n6_DMR	12887351	12888150	1	.	800	.
chr1	.	h1EM_EN_g6d3n6_DMR	12888651	12888850	1	.	200	.
chr1	.	h1EM_EN_g6d3n6_DMR	12894651	12895500	1	.	850	.
chr1	.	h1EM_EN_g6d3n6_DMR	12896301	12896450	1	.	150	.
chr1	.	h1EM_EN_g6d3n6_DMR	12898451	12901050	1	.	2600	.
chr1	.	h1EM_EN_g6d3n6_DMR	12901401	12901600	1	.	200	.
chr1	.	h1EM_EN_g6d3n6_DMR	12902051	12902600	1	.	550	.
chr1	.	h1EM_EN_g6d3n6_DMR	12903301	12903650	1	.	350	.
chr1	.	h1EM_EN_g6d3n6_DMR	12904001	12904250	1	.	250	.
chr1	.	h1EM_EN_g6d3n6_DMR	12904651	12905200	1	.	550	.
chr1	.	h1EM_EN_g6d3n6_DMR	12906051	12907200	1	.	1150	.
chr1	.	h1EM_EN_g6d3n6_DMR	12908251	12908350	1	.	100	.
chr1	.	h1EM_EN_g6d3n6_DMR	12915951	12916150	1	.	200	.
chr1	.	h1EM_EN_g6d3n6_DMR	12918701	12919300	1	.	600	.
chr1	.	h1EM_EN_g6d3n6_DMR	12922001	12924500	1	.	2500	.
chr1	.	h1EM_EN_g6d3n6_DMR	12925101	12926000	1	.	900	.
chr1	.	h1EM_EN_g6d3n6_DMR	12926501	12927400	1	.	900	.
chr1	.	h1EM_EN_g6d3n6_DMR	12927951	12930600	1	.	2650	.
chr1	.	h1EM_EN_g6d3n6_DMR	12931151	12931450	1	.	300	.
chr1	.	h1EM_EN_g6d3n6_DMR	12931851	12932550	1	.	700	.
chr1	.	h1EM_EN_g6d3n6_DMR	12942051	12943100	1	.	1050	.
chr1	.	h1EM_EN_g6d3n6_DMR	12946901	12947000	1	.	100	.
chr1	.	h1EM_EN_g6d3n6_DMR	12953451	12954100	1	.	650	.
chr1	.	h1EM_EN_g6d3n6_DMR	12959501	12959750	1	.	250	.
chr1	.	h1EM_EN_g6d3n6_DMR	12963551	12964050	1	.	500	.
chr1	.	h1EM_EN_g6d3n6_DMR	12967851	12968800	1	.	950	.
chr1	.	h1EM_EN_g6d3n6_DMR	12976601	12977450	1	.	850	.
chr1	.	h1EM_EN_g6d3n6_DMR	12980201	12980450	1	.	250	.
chr1	.	h1EM_EN_g6d3n6_DMR	12985251	12985700	1	.	450	.
chr1	.	h1EM_EN_g6d3n6_DMR	12993201	12993750	1	.	550	.
chr1	.	h1EM_EN_g6d3n6_DMR	12997051	12998000	1	.	950	.
chr1	.	h1EM_EN_g6d3n6_DMR	13007301	13007450	1	.	150	.
chr1	.	h1EM_EN_g6d3n6_DMR	13012851	13012950	1	.	100	.
chr1	.	h1EM_EN_g6d3n6_DMR	13015401	13017650	1	.	2250	.
chr1	.	h1EM_EN_g6d3n6_DMR	13025751	13025950	1	.	200	.
chr1	.	h1EM_EN_g6d3n6_DMR	13027751	13028800	1	.	1050	.
chr1	.	h1EM_EN_g6d3n6_DMR	13030301	13030400	1	.	100	.
chr1	.	h1EM_EN_g6d3n6_DMR	13036751	13037700	1	.	950	.
chr1	.	h1EM_EN_g6d3n6_DMR	13038901	13039550	1	.	650	.
chr1	.	h1EM_EN_g6d3n6_DMR	13043151	13044050	1	.	900	.
chr1	.	h1EM_EN_g6d3n6_DMR	13044551	13044650	1	.	100	.
chr1	.	h1EM_EN_g6d3n6_DMR	13045051	13045300	1	.	250	.
chr1	.	h1EM_EN_g6d3n6_DMR	13049751	13049950	1	.	200	.
chr1	.	h1EM_EN_g6d3n6_DMR	13055401	13056050	1	.	650	.
chr1	.	h1EM_EN_g6d3n6_DMR	13058951	13059350	1	.	400	.
chr1	.	h1EM_EN_g6d3n6_DMR	13059951	13060350	1	.	400	.
chr1	.	h1EM_EN_g6d3n6_DMR	13060701	13060900	1	.	200	.
chr1	.	h1EM_EN_g6d3n6_DMR	13062401	13062550	1	.	150	.
chr1	.	h1EM_EN_g6d3n6_DMR	13064001	13064400	1	.	400	.
chr1	.	h1EM_EN_g6d3n6_DMR	13067751	13069350	1	.	1600	.
chr1	.	h1EM_EN_g6d3n6_DMR	13069701	13070400	1	.	700	.
chr1	.	h1EM_EN_g6d3n6_DMR	13070751	13070850	1	.	100	.
chr1	.	h1EM_EN_g6d3n6_DMR	13073151	13073550	1	.	400	.
chr1	.	h1EM_EN_g6d3n6_DMR	13080401	13084600	1	.	4200	.
chr1	.	h1EM_EN_g6d3n6_DMR	13085651	13085950	1	.	300	.
chr1	.	h1EM_EN_g6d3n6_DMR	13086351	13087750	1	.	1400	.
chr1	.	h1EM_EN_g6d3n6_DMR	13088551	13089500	1	.	950	.
chr1	.	h1EM_EN_g6d3n6_DMR	13097301	13098150	1	.	850	.
chr1	.	h1EM_EN_g6d3n6_DMR	13103651	13103750	1	.	100	.
chr1	.	h1EM_EN_g6d3n6_DMR	13104151	13105150	1	.	1000	.
chr1	.	h1EM_EN_g6d3n6_DMR	13106301	13112200	1	.	5900	.
chr1	.	h1EM_EN_g6d3n6_DMR	13114351	13114950	1	.	600	.
chr1	.	h1EM_EN_g6d3n6_DMR	13119401	13119600	1	.	200	.
chr1	.	h1EM_EN_g6d3n6_DMR	13121401	13121950	1	.	550	.
chr1	.	h1EM_EN_g6d3n6_DMR	13126851	13128550	1	.	1700	.
chr1	.	h1EM_EN_g6d3n6_DMR	13129951	13130350	1	.	400	.
chr1	.	h1EM_EN_g6d3n6_DMR	13131401	13131600	1	.	200	.
chr1	.	h1EM_EN_g6d3n6_DMR	13139951	13140250	1	.	300	.
chr1	.	h1EM_EN_g6d3n6_DMR	13147401	13147700	1	.	300	.
chr1	.	h1EM_EN_g6d3n6_DMR	13148401	13148600	1	.	200	.
chr1	.	h1EM_EN_g6d3n6_DMR	13149651	13150500	1	.	850	.
chr1	.	h1EM_EN_g6d3n6_DMR	13150951	13151400	1	.	450	.
chr1	.	h1EM_EN_g6d3n6_DMR	13155801	13156300	1	.	500	.
chr1	.	h1EM_EN_g6d3n6_DMR	13160651	13162900	1	.	2250	.
chr1	.	h1EM_EN_g6d3n6_DMR	13164651	13165400	1	.	750	.
chr1	.	h1EM_EN_g6d3n6_DMR	13166601	13167000	1	.	400	.
chr1	.	h1EM_EN_g6d3n6_DMR	13170851	13171350	1	.	500	.
chr1	.	h1EM_EN_g6d3n6_DMR	13172951	13173750	1	.	800	.
chr1	.	h1EM_EN_g6d3n6_DMR	13198451	13200350	1	.	1900	.
chr1	.	h1EM_EN_g6d3n6_DMR	13202951	13203250	1	.	300	.
chr1	.	h1EM_EN_g6d3n6_DMR	13205651	13206000	1	.	350	.
chr1	.	h1EM_EN_g6d3n6_DMR	13212551	13213300	1	.	750	.
chr1	.	h1EM_EN_g6d3n6_DMR	13213651	13215400	1	.	1750	.
chr1	.	h1EM_EN_g6d3n6_DMR	13216451	13217400	1	.	950	.
chr1	.	h1EM_EN_g6d3n6_DMR	13219301	13219600	1	.	300	.
chr1	.	h1EM_EN_g6d3n6_DMR	13221551	13221850	1	.	300	.
chr1	.	h1EM_EN_g6d3n6_DMR	13233051	13233150	1	.	100	.
chr1	.	h1EM_EN_g6d3n6_DMR	13234251	13235200	1	.	950	.
chr1	.	h1EM_EN_g6d3n6_DMR	13235551	13237250	1	.	1700	.
chr1	.	h1EM_EN_g6d3n6_DMR	13237601	13238250	1	.	650	.
chr1	.	h1EM_EN_g6d3n6_DMR	13238901	13239400	1	.	500	.
chr1	.	h1EM_EN_g6d3n6_DMR	13239751	13240250	1	.	500	.
chr1	.	h1EM_EN_g6d3n6_DMR	13243501	13243750	1	.	250	.
chr1	.	h1EM_EN_g6d3n6_DMR	13244151	13244500	1	.	350	.
chr1	.	h1EM_EN_g6d3n6_DMR	13245101	13247400	1	.	2300	.
chr1	.	h1EM_EN_g6d3n6_DMR	13247851	13249900	1	.	2050	.
chr1	.	h1EM_EN_g6d3n6_DMR	13250401	13251600	1	.	1200	.
chr1	.	h1EM_EN_g6d3n6_DMR	13252001	13253200	1	.	1200	.
chr1	.	h1EM_EN_g6d3n6_DMR	13258151	13258500	1	.	350	.
chr1	.	h1EM_EN_g6d3n6_DMR	13262301	13263050	1	.	750	.
chr1	.	h1EM_EN_g6d3n6_DMR	13264501	13265450	1	.	950	.
chr1	.	h1EM_EN_g6d3n6_DMR	13280051	13280250	1	.	200	.
chr1	.	h1EM_EN_g6d3n6_DMR	13282951	13283050	1	.	100	.
chr1	.	h1EM_EN_g6d3n6_DMR	13283551	13283750	1	.	200	.
chr1	.	h1EM_EN_g6d3n6_DMR	13284351	13287550	1	.	3200	.
chr1	.	h1EM_EN_g6d3n6_DMR	13287951	13290400	1	.	2450	.
chr1	.	h1EM_EN_g6d3n6_DMR	13291851	13293550	1	.	1700	.
chr1	.	h1EM_EN_g6d3n6_DMR	13294901	13295050	1	.	150	.
chr1	.	h1EM_EN_g6d3n6_DMR	13298301	13299050	1	.	750	.
chr1	.	h1EM_EN_g6d3n6_DMR	13302451	13302550	1	.	100	.
chr1	.	h1EM_EN_g6d3n6_DMR	13302901	13303750	1	.	850	.
chr1	.	h1EM_EN_g6d3n6_DMR	13304551	13304650	1	.	100	.
chr1	.	h1EM_EN_g6d3n6_DMR	13305251	13306650	1	.	1400	.
chr1	.	h1EM_EN_g6d3n6_DMR	13310451	13313150	1	.	2700	.
chr1	.	h1EM_EN_g6d3n6_DMR	13313601	13313800	1	.	200	.
chr1	.	h1EM_EN_g6d3n6_DMR	13314851	13315000	1	.	150	.
chr1	.	h1EM_EN_g6d3n6_DMR	13315601	13315750	1	.	150	.
chr1	.	h1EM_EN_g6d3n6_DMR	13325201	13325900	1	.	700	.
chr1	.	h1EM_EN_g6d3n6_DMR	13331101	13331650	1	.	550	.
chr1	.	h1EM_EN_g6d3n6_DMR	13343651	13344700	1	.	1050	.
chr1	.	h1EM_EN_g6d3n6_DMR	13346601	13348350	1	.	1750	.
chr1	.	h1EM_EN_g6d3n6_DMR	13348701	13349350	1	.	650	.
chr1	.	h1EM_EN_g6d3n6_DMR	13350901	13351500	1	.	600	.
chr1	.	h1EM_EN_g6d3n6_DMR	13352351	13352700	1	.	350	.
chr1	.	h1EM_EN_g6d3n6_DMR	13354151	13357950	1	.	3800	.
chr1	.	h1EM_EN_g6d3n6_DMR	13358301	13358400	1	.	100	.
chr1	.	h1EM_EN_g6d3n6_DMR	13360451	13360550	1	.	100	.
chr1	.	h1EM_EN_g6d3n6_DMR	13367451	13367700	1	.	250	.
chr1	.	h1EM_EN_g6d3n6_DMR	13372701	13373050	1	.	350	.
chr1	.	h1EM_EN_g6d3n6_DMR	13376351	13376950	1	.	600	.
chr1	.	h1EM_EN_g6d3n6_DMR	13378401	13378950	1	.	550	.
chr1	.	h1EM_EN_g6d3n6_DMR	13385351	13386050	1	.	700	.
chr1	.	h1EM_EN_g6d3n6_DMR	13387251	13392250	1	.	5000	.
chr1	.	h1EM_EN_g6d3n6_DMR	13393501	13393650	1	.	150	.
chr1	.	h1EM_EN_g6d3n6_DMR	13398051	13398850	1	.	800	.
chr1	.	h1EM_EN_g6d3n6_DMR	13404001	13404100	1	.	100	.
chr1	.	h1EM_EN_g6d3n6_DMR	13406001	13406350	1	.	350	.
chr1	.	h1EM_EN_g6d3n6_DMR	13409001	13409850	1	.	850	.
chr1	.	h1EM_EN_g6d3n6_DMR	13410201	13410750	1	.	550	.
chr1	.	h1EM_EN_g6d3n6_DMR	13418901	13419750	1	.	850	.
chr1	.	h1EM_EN_g6d3n6_DMR	13422451	13423400	1	.	950	.
chr1	.	h1EM_EN_g6d3n6_DMR	13423751	13423900	1	.	150	.
chr1	.	h1EM_EN_g6d3n6_DMR	13424301	13428000	1	.	3700	.
chr1	.	h1EM_EN_g6d3n6_DMR	13431201	13432250	1	.	1050	.
chr1	.	h1EM_EN_g6d3n6_DMR	13432801	13433450	1	.	650	.
chr1	.	h1EM_EN_g6d3n6_DMR	13436351	13437700	1	.	1350	.
chr1	.	h1EM_EN_g6d3n6_DMR	13438401	13439150	1	.	750	.
chr1	.	h1EM_EN_g6d3n6_DMR	13450301	13450450	1	.	150	.
chr1	.	h1EM_EN_g6d3n6_DMR	13450851	13451000	1	.	150	.
chr1	.	h1EM_EN_g6d3n6_DMR	13454951	13455200	1	.	250	.
chr1	.	h1EM_EN_g6d3n6_DMR	13458151	13458250	1	.	100	.
chr1	.	h1EM_EN_g6d3n6_DMR	13462601	13463500	1	.	900	.
chr1	.	h1EM_EN_g6d3n6_DMR	13464501	13464950	1	.	450	.
chr1	.	h1EM_EN_g6d3n6_DMR	13466351	13467450	1	.	1100	.
chr1	.	h1EM_EN_g6d3n6_DMR	13474801	13475350	1	.	550	.
chr1	.	h1EM_EN_g6d3n6_DMR	13477051	13478500	1	.	1450	.
chr1	.	h1EM_EN_g6d3n6_DMR	13481051	13482050	1	.	1000	.
chr1	.	h1EM_EN_g6d3n6_DMR	13482401	13482700	1	.	300	.
chr1	.	h1EM_EN_g6d3n6_DMR	13483151	13483550	1	.	400	.
chr1	.	h1EM_EN_g6d3n6_DMR	13497001	13497650	1	.	650	.
chr1	.	h1EM_EN_g6d3n6_DMR	13498651	13499250	1	.	600	.
chr1	.	h1EM_EN_g6d3n6_DMR	13499651	13499800	1	.	150	.
chr1	.	h1EM_EN_g6d3n6_DMR	13522001	13524550	1	.	2550	.
chr1	.	h1EM_EN_g6d3n6_DMR	13524901	13525050	1	.	150	.
chr1	.	h1EM_EN_g6d3n6_DMR	13525501	13529350	1	.	3850	.
chr1	.	h1EM_EN_g6d3n6_DMR	13530001	13530100	1	.	100	.
chr1	.	h1EM_EN_g6d3n6_DMR	13533751	13534200	1	.	450	.
chr1	.	h1EM_EN_g6d3n6_DMR	13545651	13546750	1	.	1100	.
chr1	.	h1EM_EN_g6d3n6_DMR	13549451	13550100	1	.	650	.
chr1	.	h1EM_EN_g6d3n6_DMR	13550501	13550950	1	.	450	.
chr1	.	h1EM_EN_g6d3n6_DMR	13560951	13561200	1	.	250	.
chr1	.	h1EM_EN_g6d3n6_DMR	13566551	13567500	1	.	950	.
chr1	.	h1EM_EN_g6d3n6_DMR	13568101	13568450	1	.	350	.
chr1	.	h1EM_EN_g6d3n6_DMR	13569201	13569600	1	.	400	.
chr1	.	h1EM_EN_g6d3n6_DMR	13571651	13573100	1	.	1450	.
chr1	.	h1EM_EN_g6d3n6_DMR	13573451	13573800	1	.	350	.
chr1	.	h1EM_EN_g6d3n6_DMR	13581901	13584200	1	.	2300	.
chr1	.	h1EM_EN_g6d3n6_DMR	13584601	13585200	1	.	600	.
chr1	.	h1EM_EN_g6d3n6_DMR	13585551	13588850	1	.	3300	.
chr1	.	h1EM_EN_g6d3n6_DMR	13591901	13592450	1	.	550	.
chr1	.	h1EM_EN_g6d3n6_DMR	13593001	13593150	1	.	150	.
chr1	.	h1EM_EN_g6d3n6_DMR	13602751	13604200	1	.	1450	.
chr1	.	h1EM_EN_g6d3n6_DMR	13605301	13605900	1	.	600	.
chr1	.	h1EM_EN_g6d3n6_DMR	13617951	13618200	1	.	250	.
chr1	.	h1EM_EN_g6d3n6_DMR	13625001	13625150	1	.	150	.
chr1	.	h1EM_EN_g6d3n6_DMR	13635551	13636150	1	.	600	.
chr1	.	h1EM_EN_g6d3n6_DMR	13637451	13640050	1	.	2600	.
chr1	.	h1EM_EN_g6d3n6_DMR	13644851	13645850	1	.	1000	.
chr1	.	h1EM_EN_g6d3n6_DMR	13655851	13656950	1	.	1100	.
chr1	.	h1EM_EN_g6d3n6_DMR	13657401	13657650	1	.	250	.
chr1	.	h1EM_EN_g6d3n6_DMR	13658001	13658250	1	.	250	.
chr1	.	h1EM_EN_g6d3n6_DMR	13658601	13660300	1	.	1700	.
chr1	.	h1EM_EN_g6d3n6_DMR	13667751	13668150	1	.	400	.
chr1	.	h1EM_EN_g6d3n6_DMR	13668951	13669650	1	.	700	.
chr1	.	h1EM_EN_g6d3n6_DMR	13670101	13670300	1	.	200	.
chr1	.	h1EM_EN_g6d3n6_DMR	13672401	13672700	1	.	300	.
chr1	.	h1EM_EN_g6d3n6_DMR	13676501	13677000	1	.	500	.
chr1	.	h1EM_EN_g6d3n6_DMR	13685751	13686000	1	.	250	.
chr1	.	h1EM_EN_g6d3n6_DMR	13687901	13688900	1	.	1000	.
chr1	.	h1EM_EN_g6d3n6_DMR	13700951	13701300	1	.	350	.
chr1	.	h1EM_EN_g6d3n6_DMR	13705301	13706000	1	.	700	.
chr1	.	h1EM_EN_g6d3n6_DMR	13716801	13717300	1	.	500	.
chr1	.	h1EM_EN_g6d3n6_DMR	13717651	13718200	1	.	550	.
chr1	.	h1EM_EN_g6d3n6_DMR	13718601	13719850	1	.	1250	.
chr1	.	h1EM_EN_g6d3n6_DMR	13720851	13721500	1	.	650	.
chr1	.	h1EM_EN_g6d3n6_DMR	13731001	13731450	1	.	450	.
chr1	.	h1EM_EN_g6d3n6_DMR	13732151	13733050	1	.	900	.
chr1	.	h1EM_EN_g6d3n6_DMR	13733601	13734300	1	.	700	.
chr1	.	h1EM_EN_g6d3n6_DMR	13744801	13745300	1	.	500	.
chr1	.	h1EM_EN_g6d3n6_DMR	13746501	13746600	1	.	100	.
chr1	.	h1EM_EN_g6d3n6_DMR	13747101	13747450	1	.	350	.
chr1	.	h1EM_EN_g6d3n6_DMR	13749051	13749300	1	.	250	.
chr1	.	h1EM_EN_g6d3n6_DMR	13749951	13750850	1	.	900	.
chr1	.	h1EM_EN_g6d3n6_DMR	13751751	13752600	1	.	850	.
chr1	.	h1EM_EN_g6d3n6_DMR	13753501	13753950	1	.	450	.
chr1	.	h1EM_EN_g6d3n6_DMR	13754451	13754700	1	.	250	.
chr1	.	h1EM_EN_g6d3n6_DMR	13755251	13756450	1	.	1200	.
chr1	.	h1EM_EN_g6d3n6_DMR	13757251	13758150	1	.	900	.
chr1	.	h1EM_EN_g6d3n6_DMR	13760551	13764450	1	.	3900	.
chr1	.	h1EM_EN_g6d3n6_DMR	13765001	13765650	1	.	650	.
chr1	.	h1EM_EN_g6d3n6_DMR	13766601	13766700	1	.	100	.
chr1	.	h1EM_EN_g6d3n6_DMR	13767451	13767650	1	.	200	.
chr1	.	h1EM_EN_g6d3n6_DMR	13768351	13769900	1	.	1550	.
chr1	.	h1EM_EN_g6d3n6_DMR	13804801	13805100	1	.	300	.
chr1	.	h1EM_EN_g6d3n6_DMR	13808901	13809300	1	.	400	.
chr1	.	h1EM_EN_g6d3n6_DMR	13809651	13810350	1	.	700	.
chr1	.	h1EM_EN_g6d3n6_DMR	13811901	13812700	1	.	800	.
chr1	.	h1EM_EN_g6d3n6_DMR	13813301	13813900	1	.	600	.
chr1	.	h1EM_EN_g6d3n6_DMR	13836901	13837200	1	.	300	.
chr1	.	h1EM_EN_g6d3n6_DMR	13840551	13840900	1	.	350	.
chr1	.	h1EM_EN_g6d3n6_DMR	13849051	13849550	1	.	500	.
chr1	.	h1EM_EN_g6d3n6_DMR	13850201	13850400	1	.	200	.
chr1	.	h1EM_EN_g6d3n6_DMR	13851501	13851950	1	.	450	.
chr1	.	h1EM_EN_g6d3n6_DMR	13853201	13853750	1	.	550	.
chr1	.	h1EM_EN_g6d3n6_DMR	13855451	13855800	1	.	350	.
chr1	.	h1EM_EN_g6d3n6_DMR	13856301	13857250	1	.	950	.
chr1	.	h1EM_EN_g6d3n6_DMR	13857601	13858500	1	.	900	.
chr1	.	h1EM_EN_g6d3n6_DMR	13860501	13860750	1	.	250	.
chr1	.	h1EM_EN_g6d3n6_DMR	13861351	13861550	1	.	200	.
chr1	.	h1EM_EN_g6d3n6_DMR	13867301	13868050	1	.	750	.
chr1	.	h1EM_EN_g6d3n6_DMR	13868401	13868500	1	.	100	.
chr1	.	h1EM_EN_g6d3n6_DMR	13869501	13869800	1	.	300	.
chr1	.	h1EM_EN_g6d3n6_DMR	13871601	13872050	1	.	450	.
chr1	.	h1EM_EN_g6d3n6_DMR	13873651	13874650	1	.	1000	.
chr1	.	h1EM_EN_g6d3n6_DMR	13875051	13875250	1	.	200	.
chr1	.	h1EM_EN_g6d3n6_DMR	13876901	13877200	1	.	300	.
chr1	.	h1EM_EN_g6d3n6_DMR	13877651	13879750	1	.	2100	.
chr1	.	h1EM_EN_g6d3n6_DMR	13880251	13881950	1	.	1700	.
chr1	.	h1EM_EN_g6d3n6_DMR	13882701	13882900	1	.	200	.
chr1	.	h1EM_EN_g6d3n6_DMR	13883301	13883650	1	.	350	.
chr1	.	h1EM_EN_g6d3n6_DMR	13884651	13884750	1	.	100	.
chr1	.	h1EM_EN_g6d3n6_DMR	13892951	13893050	1	.	100	.
chr1	.	h1EM_EN_g6d3n6_DMR	13893951	13894650	1	.	700	.
chr1	.	h1EM_EN_g6d3n6_DMR	13896101	13897050	1	.	950	.
chr1	.	h1EM_EN_g6d3n6_DMR	13899951	13900100	1	.	150	.
chr1	.	h1EM_EN_g6d3n6_DMR	13902551	13903400	1	.	850	.
chr1	.	h1EM_EN_g6d3n6_DMR	13908001	13908400	1	.	400	.
chr1	.	h1EM_EN_g6d3n6_DMR	13908801	13911100	1	.	2300	.
chr1	.	h1EM_EN_g6d3n6_DMR	13919151	13919350	1	.	200	.
chr1	.	h1EM_EN_g6d3n6_DMR	13928501	13929400	1	.	900	.
chr1	.	h1EM_EN_g6d3n6_DMR	13964201	13964400	1	.	200	.
chr1	.	h1EM_EN_g6d3n6_DMR	13967351	13968400	1	.	1050	.
chr1	.	h1EM_EN_g6d3n6_DMR	13977951	13978300	1	.	350	.
chr1	.	h1EM_EN_g6d3n6_DMR	13980851	13981450	1	.	600	.
chr1	.	h1EM_EN_g6d3n6_DMR	13981951	13982200	1	.	250	.
chr1	.	h1EM_EN_g6d3n6_DMR	13982601	13988050	1	.	5450	.
chr1	.	h1EM_EN_g6d3n6_DMR	13988551	13989200	1	.	650	.
chr1	.	h1EM_EN_g6d3n6_DMR	13989551	13991950	1	.	2400	.
chr1	.	h1EM_EN_g6d3n6_DMR	13992301	13992950	1	.	650	.
chr1	.	h1EM_EN_g6d3n6_DMR	13993651	13993800	1	.	150	.
chr1	.	h1EM_EN_g6d3n6_DMR	13996051	13998200	1	.	2150	.
chr1	.	h1EM_EN_g6d3n6_DMR	13998951	14001800	1	.	2850	.
chr1	.	h1EM_EN_g6d3n6_DMR	14003701	14003950	1	.	250	.
chr1	.	h1EM_EN_g6d3n6_DMR	14005051	14005550	1	.	500	.
chr1	.	h1EM_EN_g6d3n6_DMR	14008001	14008200	1	.	200	.
chr1	.	h1EM_EN_g6d3n6_DMR	14014101	14014350	1	.	250	.
chr1	.	h1EM_EN_g6d3n6_DMR	14018051	14018800	1	.	750	.
chr1	.	h1EM_EN_g6d3n6_DMR	14020651	14021300	1	.	650	.
chr1	.	h1EM_EN_g6d3n6_DMR	14033251	14034150	1	.	900	.
chr1	.	h1EM_EN_g6d3n6_DMR	14034801	14034900	1	.	100	.
chr1	.	h1EM_EN_g6d3n6_DMR	14035851	14036400	1	.	550	.
chr1	.	h1EM_EN_g6d3n6_DMR	14039651	14040500	1	.	850	.
chr1	.	h1EM_EN_g6d3n6_DMR	14041501	14042100	1	.	600	.
chr1	.	h1EM_EN_g6d3n6_DMR	14044451	14044550	1	.	100	.
chr1	.	h1EM_EN_g6d3n6_DMR	14045851	14046550	1	.	700	.
chr1	.	h1EM_EN_g6d3n6_DMR	14054351	14054600	1	.	250	.
chr1	.	h1EM_EN_g6d3n6_DMR	14057901	14058700	1	.	800	.
chr1	.	h1EM_EN_g6d3n6_DMR	14068351	14068550	1	.	200	.
chr1	.	h1EM_EN_g6d3n6_DMR	14070651	14071100	1	.	450	.
chr1	.	h1EM_EN_g6d3n6_DMR	14114701	14116250	1	.	1550	.
chr1	.	h1EM_EN_g6d3n6_DMR	14119901	14120650	1	.	750	.
chr1	.	h1EM_EN_g6d3n6_DMR	14121101	14122150	1	.	1050	.
chr1	.	h1EM_EN_g6d3n6_DMR	14140751	14141600	1	.	850	.
chr1	.	h1EM_EN_g6d3n6_DMR	14141951	14142350	1	.	400	.
chr1	.	h1EM_EN_g6d3n6_DMR	14145501	14145850	1	.	350	.
chr1	.	h1EM_EN_g6d3n6_DMR	14149401	14149700	1	.	300	.
chr1	.	h1EM_EN_g6d3n6_DMR	14153901	14154200	1	.	300	.
chr1	.	h1EM_EN_g6d3n6_DMR	14155251	14155650	1	.	400	.
chr1	.	h1EM_EN_g6d3n6_DMR	14157101	14157600	1	.	500	.
chr1	.	h1EM_EN_g6d3n6_DMR	14158101	14158450	1	.	350	.
chr1	.	h1EM_EN_g6d3n6_DMR	14160401	14160550	1	.	150	.
chr1	.	h1EM_EN_g6d3n6_DMR	14166651	14167100	1	.	450	.
chr1	.	h1EM_EN_g6d3n6_DMR	14168251	14168550	1	.	300	.
chr1	.	h1EM_EN_g6d3n6_DMR	14169801	14170050	1	.	250	.
chr1	.	h1EM_EN_g6d3n6_DMR	14171751	14172000	1	.	250	.
chr1	.	h1EM_EN_g6d3n6_DMR	14187401	14188850	1	.	1450	.
chr1	.	h1EM_EN_g6d3n6_DMR	14189201	14190600	1	.	1400	.
chr1	.	h1EM_EN_g6d3n6_DMR	14276001	14276100	1	.	100	.
chr1	.	h1EM_EN_g6d3n6_DMR	14279801	14280100	1	.	300	.
chr1	.	h1EM_EN_g6d3n6_DMR	14284751	14285100	1	.	350	.
chr1	.	h1EM_EN_g6d3n6_DMR	14285901	14287250	1	.	1350	.
chr1	.	h1EM_EN_g6d3n6_DMR	14288601	14289200	1	.	600	.
chr1	.	h1EM_EN_g6d3n6_DMR	14289551	14290650	1	.	1100	.
chr1	.	h1EM_EN_g6d3n6_DMR	14291551	14291800	1	.	250	.
chr1	.	h1EM_EN_g6d3n6_DMR	14295101	14295400	1	.	300	.
chr1	.	h1EM_EN_g6d3n6_DMR	14298851	14299700	1	.	850	.
chr1	.	h1EM_EN_g6d3n6_DMR	14300901	14301100	1	.	200	.
chr1	.	h1EM_EN_g6d3n6_DMR	14301651	14301950	1	.	300	.
chr1	.	h1EM_EN_g6d3n6_DMR	14303001	14303100	1	.	100	.
chr1	.	h1EM_EN_g6d3n6_DMR	14305601	14306200	1	.	600	.
chr1	.	h1EM_EN_g6d3n6_DMR	14307301	14307600	1	.	300	.
chr1	.	h1EM_EN_g6d3n6_DMR	14311201	14311350	1	.	150	.
chr1	.	h1EM_EN_g6d3n6_DMR	14311701	14311850	1	.	150	.
chr1	.	h1EM_EN_g6d3n6_DMR	14312201	14312900	1	.	700	.
chr1	.	h1EM_EN_g6d3n6_DMR	14313751	14313850	1	.	100	.
chr1	.	h1EM_EN_g6d3n6_DMR	14332651	14332900	1	.	250	.
chr1	.	h1EM_EN_g6d3n6_DMR	14605801	14606100	1	.	300	.
chr1	.	h1EM_EN_g6d3n6_DMR	14606751	14606950	1	.	200	.
chr1	.	h1EM_EN_g6d3n6_DMR	14607601	14609300	1	.	1700	.
chr1	.	h1EM_EN_g6d3n6_DMR	14610051	14610200	1	.	150	.
chr1	.	h1EM_EN_g6d3n6_DMR	14678401	14678750	1	.	350	.
chr1	.	h1EM_EN_g6d3n6_DMR	14835201	14835400	1	.	200	.
chr1	.	h1EM_EN_g6d3n6_DMR	14863401	14863550	1	.	150	.
chr1	.	h1EM_EN_g6d3n6_DMR	14916551	14916950	1	.	400	.
chr1	.	h1EM_EN_g6d3n6_DMR	14917801	14918000	1	.	200	.
chr1	.	h1EM_EN_g6d3n6_DMR	14919201	14919450	1	.	250	.
chr1	.	h1EM_EN_g6d3n6_DMR	14920251	14921000	1	.	750	.
chr1	.	h1EM_EN_g6d3n6_DMR	14923101	14923900	1	.	800	.
chr1	.	h1EM_EN_g6d3n6_DMR	14961501	14962300	1	.	800	.
chr1	.	h1EM_EN_g6d3n6_DMR	14968351	14968500	1	.	150	.
chr1	.	h1EM_EN_g6d3n6_DMR	15001151	15005100	1	.	3950	.
chr1	.	h1EM_EN_g6d3n6_DMR	15012001	15012150	1	.	150	.
chr1	.	h1EM_EN_g6d3n6_DMR	15058951	15061100	1	.	2150	.
chr1	.	h1EM_EN_g6d3n6_DMR	15067351	15067500	1	.	150	.
chr1	.	h1EM_EN_g6d3n6_DMR	15580451	15580550	1	.	100	.
chr1	.	h1EM_EN_g6d3n6_DMR	15585351	15585800	1	.	450	.
chr1	.	h1EM_EN_g6d3n6_DMR	15612601	15613050	1	.	450	.
chr1	.	h1EM_EN_g6d3n6_DMR	15615701	15618050	1	.	2350	.
chr1	.	h1EM_EN_g6d3n6_DMR	15626651	15626750	1	.	100	.
chr1	.	h1EM_EN_g6d3n6_DMR	15637001	15637300	1	.	300	.
chr1	.	h1EM_EN_g6d3n6_DMR	15638851	15639250	1	.	400	.
chr1	.	h1EM_EN_g6d3n6_DMR	15643851	15644150	1	.	300	.
chr1	.	h1EM_EN_g6d3n6_DMR	15644801	15649550	1	.	4750	.
chr1	.	h1EM_EN_g6d3n6_DMR	15659201	15659650	1	.	450	.
chr1	.	h1EM_EN_g6d3n6_DMR	15660101	15660350	1	.	250	.
chr1	.	h1EM_EN_g6d3n6_DMR	15663501	15665050	1	.	1550	.
chr1	.	h1EM_EN_g6d3n6_DMR	15665751	15667400	1	.	1650	.
chr1	.	h1EM_EN_g6d3n6_DMR	15676901	15678050	1	.	1150	.
chr1	.	h1EM_EN_g6d3n6_DMR	15687101	15687700	1	.	600	.
chr1	.	h1EM_EN_g6d3n6_DMR	15690001	15692250	1	.	2250	.
chr1	.	h1EM_EN_g6d3n6_DMR	15719001	15719300	1	.	300	.
chr1	.	h1EM_EN_g6d3n6_DMR	15723301	15723650	1	.	350	.
chr1	.	h1EM_EN_g6d3n6_DMR	15724301	15724700	1	.	400	.
chr1	.	h1EM_EN_g6d3n6_DMR	15725051	15725150	1	.	100	.
chr1	.	h1EM_EN_g6d3n6_DMR	15731251	15732750	1	.	1500	.
chr1	.	h1EM_EN_g6d3n6_DMR	15760251	15760550	1	.	300	.
chr1	.	h1EM_EN_g6d3n6_DMR	15762101	15762500	1	.	400	.
chr1	.	h1EM_EN_g6d3n6_DMR	15762851	15763100	1	.	250	.
chr1	.	h1EM_EN_g6d3n6_DMR	15763601	15764300	1	.	700	.
chr1	.	h1EM_EN_g6d3n6_DMR	15764851	15764950	1	.	100	.
chr1	.	h1EM_EN_g6d3n6_DMR	15779001	15779150	1	.	150	.
chr1	.	h1EM_EN_g6d3n6_DMR	15780601	15780750	1	.	150	.
chr1	.	h1EM_EN_g6d3n6_DMR	15784001	15784800	1	.	800	.
chr1	.	h1EM_EN_g6d3n6_DMR	15785851	15786200	1	.	350	.
chr1	.	h1EM_EN_g6d3n6_DMR	15807901	15808000	1	.	100	.
chr1	.	h1EM_EN_g6d3n6_DMR	15809801	15809900	1	.	100	.
chr1	.	h1EM_EN_g6d3n6_DMR	15817651	15817800	1	.	150	.
chr1	.	h1EM_EN_g6d3n6_DMR	15858251	15858850	1	.	600	.
chr1	.	h1EM_EN_g6d3n6_DMR	15863151	15863950	1	.	800	.
chr1	.	h1EM_EN_g6d3n6_DMR	15865101	15865200	1	.	100	.
chr1	.	h1EM_EN_g6d3n6_DMR	15866401	15866800	1	.	400	.
chr1	.	h1EM_EN_g6d3n6_DMR	15869201	15869550	1	.	350	.
chr1	.	h1EM_EN_g6d3n6_DMR	15874851	15874950	1	.	100	.
chr1	.	h1EM_EN_g6d3n6_DMR	15881651	15882550	1	.	900	.
chr1	.	h1EM_EN_g6d3n6_DMR	15883951	15884200	1	.	250	.
chr1	.	h1EM_EN_g6d3n6_DMR	15884901	15885550	1	.	650	.
chr1	.	h1EM_EN_g6d3n6_DMR	15887201	15888500	1	.	1300	.
chr1	.	h1EM_EN_g6d3n6_DMR	15888851	15889400	1	.	550	.
chr1	.	h1EM_EN_g6d3n6_DMR	15890151	15892550	1	.	2400	.
chr1	.	h1EM_EN_g6d3n6_DMR	15893001	15893400	1	.	400	.
chr1	.	h1EM_EN_g6d3n6_DMR	15896951	15897400	1	.	450	.
chr1	.	h1EM_EN_g6d3n6_DMR	15902901	15903050	1	.	150	.
chr1	.	h1EM_EN_g6d3n6_DMR	15904151	15904550	1	.	400	.
chr1	.	h1EM_EN_g6d3n6_DMR	15905001	15905250	1	.	250	.
chr1	.	h1EM_EN_g6d3n6_DMR	15908201	15908600	1	.	400	.
chr1	.	h1EM_EN_g6d3n6_DMR	15908951	15909150	1	.	200	.
chr1	.	h1EM_EN_g6d3n6_DMR	15910051	15911800	1	.	1750	.
chr1	.	h1EM_EN_g6d3n6_DMR	15920351	15921250	1	.	900	.
chr1	.	h1EM_EN_g6d3n6_DMR	15921601	15924550	1	.	2950	.
chr1	.	h1EM_EN_g6d3n6_DMR	15925951	15926100	1	.	150	.
chr1	.	h1EM_EN_g6d3n6_DMR	15941751	15943100	1	.	1350	.
chr1	.	h1EM_EN_g6d3n6_DMR	15943451	15946450	1	.	3000	.
chr1	.	h1EM_EN_g6d3n6_DMR	15946801	15946950	1	.	150	.
chr1	.	h1EM_EN_g6d3n6_DMR	15947451	15947850	1	.	400	.
chr1	.	h1EM_EN_g6d3n6_DMR	15962151	15962600	1	.	450	.
chr1	.	h1EM_EN_g6d3n6_DMR	15967051	15968200	1	.	1150	.
chr1	.	h1EM_EN_g6d3n6_DMR	15972101	15974950	1	.	2850	.
chr1	.	h1EM_EN_g6d3n6_DMR	15986451	15986650	1	.	200	.
chr1	.	h1EM_EN_g6d3n6_DMR	15987601	15988000	1	.	400	.
chr1	.	h1EM_EN_g6d3n6_DMR	15988501	15990000	1	.	1500	.
chr1	.	h1EM_EN_g6d3n6_DMR	15990851	15990950	1	.	100	.
chr1	.	h1EM_EN_g6d3n6_DMR	15991551	15991900	1	.	350	.
chr1	.	h1EM_EN_g6d3n6_DMR	15993001	15994150	1	.	1150	.
chr1	.	h1EM_EN_g6d3n6_DMR	15995001	15995800	1	.	800	.
chr1	.	h1EM_EN_g6d3n6_DMR	15996301	15998400	1	.	2100	.
chr1	.	h1EM_EN_g6d3n6_DMR	15999051	15999150	1	.	100	.
chr1	.	h1EM_EN_g6d3n6_DMR	16003351	16003450	1	.	100	.
chr1	.	h1EM_EN_g6d3n6_DMR	16005451	16006350	1	.	900	.
chr1	.	h1EM_EN_g6d3n6_DMR	16006751	16008700	1	.	1950	.
chr1	.	h1EM_EN_g6d3n6_DMR	16011401	16013200	1	.	1800	.
chr1	.	h1EM_EN_g6d3n6_DMR	16024201	16024950	1	.	750	.
chr1	.	h1EM_EN_g6d3n6_DMR	16026951	16027700	1	.	750	.
chr1	.	h1EM_EN_g6d3n6_DMR	16031601	16032150	1	.	550	.
chr1	.	h1EM_EN_g6d3n6_DMR	16036701	16038350	1	.	1650	.
chr1	.	h1EM_EN_g6d3n6_DMR	16038801	16039550	1	.	750	.
chr1	.	h1EM_EN_g6d3n6_DMR	16041201	16041300	1	.	100	.
chr1	.	h1EM_EN_g6d3n6_DMR	16042551	16042750	1	.	200	.
chr1	.	h1EM_EN_g6d3n6_DMR	16053701	16054650	1	.	950	.
chr1	.	h1EM_EN_g6d3n6_DMR	16055051	16056500	1	.	1450	.
chr1	.	h1EM_EN_g6d3n6_DMR	16056901	16058500	1	.	1600	.
chr1	.	h1EM_EN_g6d3n6_DMR	16063201	16063300	1	.	100	.
chr1	.	h1EM_EN_g6d3n6_DMR	16069851	16071850	1	.	2000	.
chr1	.	h1EM_EN_g6d3n6_DMR	16118901	16119600	1	.	700	.
chr1	.	h1EM_EN_g6d3n6_DMR	16127551	16128000	1	.	450	.
chr1	.	h1EM_EN_g6d3n6_DMR	16142051	16142700	1	.	650	.
chr1	.	h1EM_EN_g6d3n6_DMR	16145001	16146150	1	.	1150	.
chr1	.	h1EM_EN_g6d3n6_DMR	16147551	16148450	1	.	900	.
chr1	.	h1EM_EN_g6d3n6_DMR	16150951	16151900	1	.	950	.
chr1	.	h1EM_EN_g6d3n6_DMR	16160651	16161150	1	.	500	.
chr1	.	h1EM_EN_g6d3n6_DMR	16161651	16163050	1	.	1400	.
chr1	.	h1EM_EN_g6d3n6_DMR	16163601	16163750	1	.	150	.
chr1	.	h1EM_EN_g6d3n6_DMR	16164551	16164650	1	.	100	.
chr1	.	h1EM_EN_g6d3n6_DMR	16165051	16165650	1	.	600	.
chr1	.	h1EM_EN_g6d3n6_DMR	16166101	16166300	1	.	200	.
chr1	.	h1EM_EN_g6d3n6_DMR	16167151	16167950	1	.	800	.
chr1	.	h1EM_EN_g6d3n6_DMR	16169601	16169850	1	.	250	.
chr1	.	h1EM_EN_g6d3n6_DMR	16170401	16171000	1	.	600	.
chr1	.	h1EM_EN_g6d3n6_DMR	16171501	16172350	1	.	850	.
chr1	.	h1EM_EN_g6d3n6_DMR	16173151	16174450	1	.	1300	.
chr1	.	h1EM_EN_g6d3n6_DMR	16176551	16176650	1	.	100	.
chr1	.	h1EM_EN_g6d3n6_DMR	16177851	16177950	1	.	100	.
chr1	.	h1EM_EN_g6d3n6_DMR	16178551	16179400	1	.	850	.
chr1	.	h1EM_EN_g6d3n6_DMR	16184001	16185650	1	.	1650	.
chr1	.	h1EM_EN_g6d3n6_DMR	16186051	16186550	1	.	500	.
chr1	.	h1EM_EN_g6d3n6_DMR	16187151	16187450	1	.	300	.
chr1	.	h1EM_EN_g6d3n6_DMR	16187901	16188500	1	.	600	.
chr1	.	h1EM_EN_g6d3n6_DMR	16189101	16190100	1	.	1000	.
chr1	.	h1EM_EN_g6d3n6_DMR	16190751	16191400	1	.	650	.
chr1	.	h1EM_EN_g6d3n6_DMR	16217451	16217800	1	.	350	.
chr1	.	h1EM_EN_g6d3n6_DMR	16218351	16220000	1	.	1650	.
chr1	.	h1EM_EN_g6d3n6_DMR	16221451	16223300	1	.	1850	.
chr1	.	h1EM_EN_g6d3n6_DMR	16224351	16224450	1	.	100	.
chr1	.	h1EM_EN_g6d3n6_DMR	16225051	16226650	1	.	1600	.
chr1	.	h1EM_EN_g6d3n6_DMR	16227251	16227800	1	.	550	.
chr1	.	h1EM_EN_g6d3n6_DMR	16228301	16229600	1	.	1300	.
chr1	.	h1EM_EN_g6d3n6_DMR	16234151	16234450	1	.	300	.
chr1	.	h1EM_EN_g6d3n6_DMR	16239151	16240150	1	.	1000	.
chr1	.	h1EM_EN_g6d3n6_DMR	16247301	16249150	1	.	1850	.
chr1	.	h1EM_EN_g6d3n6_DMR	16249601	16251050	1	.	1450	.
chr1	.	h1EM_EN_g6d3n6_DMR	16251801	16252850	1	.	1050	.
chr1	.	h1EM_EN_g6d3n6_DMR	16253301	16255050	1	.	1750	.
chr1	.	h1EM_EN_g6d3n6_DMR	16255701	16256050	1	.	350	.
chr1	.	h1EM_EN_g6d3n6_DMR	16256451	16256750	1	.	300	.
chr1	.	h1EM_EN_g6d3n6_DMR	16257651	16259800	1	.	2150	.
chr1	.	h1EM_EN_g6d3n6_DMR	16260151	16260400	1	.	250	.
chr1	.	h1EM_EN_g6d3n6_DMR	16262351	16264050	1	.	1700	.
chr1	.	h1EM_EN_g6d3n6_DMR	16264451	16265000	1	.	550	.
chr1	.	h1EM_EN_g6d3n6_DMR	16276551	16277250	1	.	700	.
chr1	.	h1EM_EN_g6d3n6_DMR	16281601	16281800	1	.	200	.
chr1	.	h1EM_EN_g6d3n6_DMR	16282801	16283200	1	.	400	.
chr1	.	h1EM_EN_g6d3n6_DMR	16283901	16284100	1	.	200	.
chr1	.	h1EM_EN_g6d3n6_DMR	16293401	16293950	1	.	550	.
chr1	.	h1EM_EN_g6d3n6_DMR	16305351	16305850	1	.	500	.
chr1	.	h1EM_EN_g6d3n6_DMR	16309601	16309750	1	.	150	.
chr1	.	h1EM_EN_g6d3n6_DMR	16310151	16310250	1	.	100	.
chr1	.	h1EM_EN_g6d3n6_DMR	16319451	16319800	1	.	350	.
chr1	.	h1EM_EN_g6d3n6_DMR	16323951	16327700	1	.	3750	.
chr1	.	h1EM_EN_g6d3n6_DMR	16328301	16331050	1	.	2750	.
chr1	.	h1EM_EN_g6d3n6_DMR	16341751	16341850	1	.	100	.
chr1	.	h1EM_EN_g6d3n6_DMR	16342351	16346200	1	.	3850	.
chr1	.	h1EM_EN_g6d3n6_DMR	16347501	16348050	1	.	550	.
chr1	.	h1EM_EN_g6d3n6_DMR	16349051	16349950	1	.	900	.
chr1	.	h1EM_EN_g6d3n6_DMR	16350301	16350450	1	.	150	.
chr1	.	h1EM_EN_g6d3n6_DMR	16355001	16355400	1	.	400	.
chr1	.	h1EM_EN_g6d3n6_DMR	16359951	16361600	1	.	1650	.
chr1	.	h1EM_EN_g6d3n6_DMR	16361951	16362500	1	.	550	.
chr1	.	h1EM_EN_g6d3n6_DMR	16365701	16366000	1	.	300	.
chr1	.	h1EM_EN_g6d3n6_DMR	16366451	16367500	1	.	1050	.
chr1	.	h1EM_EN_g6d3n6_DMR	16368051	16368150	1	.	100	.
chr1	.	h1EM_EN_g6d3n6_DMR	16368801	16369000	1	.	200	.
chr1	.	h1EM_EN_g6d3n6_DMR	16369351	16370900	1	.	1550	.
chr1	.	h1EM_EN_g6d3n6_DMR	16396951	16397250	1	.	300	.
chr1	.	h1EM_EN_g6d3n6_DMR	16400451	16400750	1	.	300	.
chr1	.	h1EM_EN_g6d3n6_DMR	16406101	16406200	1	.	100	.
chr1	.	h1EM_EN_g6d3n6_DMR	16406751	16407050	1	.	300	.
chr1	.	h1EM_EN_g6d3n6_DMR	16415951	16417100	1	.	1150	.
chr1	.	h1EM_EN_g6d3n6_DMR	16421401	16421700	1	.	300	.
chr1	.	h1EM_EN_g6d3n6_DMR	16422051	16422250	1	.	200	.
chr1	.	h1EM_EN_g6d3n6_DMR	16423251	16423500	1	.	250	.
chr1	.	h1EM_EN_g6d3n6_DMR	16423951	16424050	1	.	100	.
chr1	.	h1EM_EN_g6d3n6_DMR	16424901	16425150	1	.	250	.
chr1	.	h1EM_EN_g6d3n6_DMR	16425501	16425850	1	.	350	.
chr1	.	h1EM_EN_g6d3n6_DMR	16426451	16426600	1	.	150	.
chr1	.	h1EM_EN_g6d3n6_DMR	16430151	16430700	1	.	550	.
chr1	.	h1EM_EN_g6d3n6_DMR	16441651	16441750	1	.	100	.
chr1	.	h1EM_EN_g6d3n6_DMR	16451901	16452150	1	.	250	.
chr1	.	h1EM_EN_g6d3n6_DMR	16452951	16453100	1	.	150	.
chr1	.	h1EM_EN_g6d3n6_DMR	16453751	16454150	1	.	400	.
chr1	.	h1EM_EN_g6d3n6_DMR	16454751	16455600	1	.	850	.
chr1	.	h1EM_EN_g6d3n6_DMR	16457651	16457750	1	.	100	.
chr1	.	h1EM_EN_g6d3n6_DMR	16458301	16460150	1	.	1850	.
chr1	.	h1EM_EN_g6d3n6_DMR	16460901	16461300	1	.	400	.
chr1	.	h1EM_EN_g6d3n6_DMR	16462601	16462800	1	.	200	.
chr1	.	h1EM_EN_g6d3n6_DMR	16465901	16466200	1	.	300	.
chr1	.	h1EM_EN_g6d3n6_DMR	16468951	16469300	1	.	350	.
chr1	.	h1EM_EN_g6d3n6_DMR	16469951	16470250	1	.	300	.
chr1	.	h1EM_EN_g6d3n6_DMR	16472301	16472550	1	.	250	.
chr1	.	h1EM_EN_g6d3n6_DMR	16476601	16477050	1	.	450	.
chr1	.	h1EM_EN_g6d3n6_DMR	16479551	16480550	1	.	1000	.
chr1	.	h1EM_EN_g6d3n6_DMR	16482251	16483250	1	.	1000	.
chr1	.	h1EM_EN_g6d3n6_DMR	16488401	16488650	1	.	250	.
chr1	.	h1EM_EN_g6d3n6_DMR	16491251	16491400	1	.	150	.
chr1	.	h1EM_EN_g6d3n6_DMR	16494251	16494850	1	.	600	.
chr1	.	h1EM_EN_g6d3n6_DMR	16537101	16537650	1	.	550	.
chr1	.	h1EM_EN_g6d3n6_DMR	16538051	16538800	1	.	750	.
chr1	.	h1EM_EN_g6d3n6_DMR	16540651	16540750	1	.	100	.
chr1	.	h1EM_EN_g6d3n6_DMR	16547501	16548150	1	.	650	.
chr1	.	h1EM_EN_g6d3n6_DMR	16548651	16548800	1	.	150	.
chr1	.	h1EM_EN_g6d3n6_DMR	16549151	16550800	1	.	1650	.
chr1	.	h1EM_EN_g6d3n6_DMR	16553501	16553950	1	.	450	.
chr1	.	h1EM_EN_g6d3n6_DMR	16560901	16561400	1	.	500	.
chr1	.	h1EM_EN_g6d3n6_DMR	16563651	16563950	1	.	300	.
chr1	.	h1EM_EN_g6d3n6_DMR	16566701	16566800	1	.	100	.
chr1	.	h1EM_EN_g6d3n6_DMR	16570501	16570700	1	.	200	.
chr1	.	h1EM_EN_g6d3n6_DMR	16583751	16583850	1	.	100	.
chr1	.	h1EM_EN_g6d3n6_DMR	16592351	16592500	1	.	150	.
chr1	.	h1EM_EN_g6d3n6_DMR	16593401	16593800	1	.	400	.
chr1	.	h1EM_EN_g6d3n6_DMR	16594501	16595100	1	.	600	.
chr1	.	h1EM_EN_g6d3n6_DMR	16595451	16597200	1	.	1750	.
chr1	.	h1EM_EN_g6d3n6_DMR	16597551	16598650	1	.	1100	.
chr1	.	h1EM_EN_g6d3n6_DMR	16601101	16602000	1	.	900	.
chr1	.	h1EM_EN_g6d3n6_DMR	16602501	16602600	1	.	100	.
chr1	.	h1EM_EN_g6d3n6_DMR	16602951	16604050	1	.	1100	.
chr1	.	h1EM_EN_g6d3n6_DMR	16604951	16606500	1	.	1550	.
chr1	.	h1EM_EN_g6d3n6_DMR	16607601	16607800	1	.	200	.
chr1	.	h1EM_EN_g6d3n6_DMR	16608451	16610550	1	.	2100	.
chr1	.	h1EM_EN_g6d3n6_DMR	16613651	16614150	1	.	500	.
chr1	.	h1EM_EN_g6d3n6_DMR	16614601	16615800	1	.	1200	.
chr1	.	h1EM_EN_g6d3n6_DMR	16616151	16617550	1	.	1400	.
chr1	.	h1EM_EN_g6d3n6_DMR	16627051	16627200	1	.	150	.
chr1	.	h1EM_EN_g6d3n6_DMR	16627651	16628100	1	.	450	.
chr1	.	h1EM_EN_g6d3n6_DMR	16648151	16648450	1	.	300	.
chr1	.	h1EM_EN_g6d3n6_DMR	16650351	16650800	1	.	450	.
chr1	.	h1EM_EN_g6d3n6_DMR	16651401	16651500	1	.	100	.
chr1	.	h1EM_EN_g6d3n6_DMR	16652701	16652950	1	.	250	.
chr1	.	h1EM_EN_g6d3n6_DMR	16653401	16654150	1	.	750	.
chr1	.	h1EM_EN_g6d3n6_DMR	16655051	16655900	1	.	850	.
chr1	.	h1EM_EN_g6d3n6_DMR	16660751	16660950	1	.	200	.
chr1	.	h1EM_EN_g6d3n6_DMR	16668651	16669250	1	.	600	.
chr1	.	h1EM_EN_g6d3n6_DMR	16669901	16670300	1	.	400	.
chr1	.	h1EM_EN_g6d3n6_DMR	16670651	16671250	1	.	600	.
chr1	.	h1EM_EN_g6d3n6_DMR	16672601	16675850	1	.	3250	.
chr1	.	h1EM_EN_g6d3n6_DMR	16676251	16677400	1	.	1150	.
chr1	.	h1EM_EN_g6d3n6_DMR	16685951	16686350	1	.	400	.
chr1	.	h1EM_EN_g6d3n6_DMR	16687401	16687550	1	.	150	.
chr1	.	h1EM_EN_g6d3n6_DMR	16689201	16689300	1	.	100	.
chr1	.	h1EM_EN_g6d3n6_DMR	16692201	16692850	1	.	650	.
chr1	.	h1EM_EN_g6d3n6_DMR	16693551	16694650	1	.	1100	.
chr1	.	h1EM_EN_g6d3n6_DMR	16701701	16705250	1	.	3550	.
chr1	.	h1EM_EN_g6d3n6_DMR	16708601	16710150	1	.	1550	.
chr1	.	h1EM_EN_g6d3n6_DMR	16712701	16713000	1	.	300	.
chr1	.	h1EM_EN_g6d3n6_DMR	16713551	16714450	1	.	900	.
chr1	.	h1EM_EN_g6d3n6_DMR	16715301	16715550	1	.	250	.
chr1	.	h1EM_EN_g6d3n6_DMR	16722601	16723100	1	.	500	.
chr1	.	h1EM_EN_g6d3n6_DMR	16724551	16724950	1	.	400	.
chr1	.	h1EM_EN_g6d3n6_DMR	16741001	16741200	1	.	200	.
chr1	.	h1EM_EN_g6d3n6_DMR	16759801	16760700	1	.	900	.
chr1	.	h1EM_EN_g6d3n6_DMR	16761251	16761450	1	.	200	.
chr1	.	h1EM_EN_g6d3n6_DMR	16764201	16764300	1	.	100	.
chr1	.	h1EM_EN_g6d3n6_DMR	16771101	16771350	1	.	250	.
chr1	.	h1EM_EN_g6d3n6_DMR	16772351	16773450	1	.	1100	.
chr1	.	h1EM_EN_g6d3n6_DMR	16774601	16774800	1	.	200	.
chr1	.	h1EM_EN_g6d3n6_DMR	16775901	16776200	1	.	300	.
chr1	.	h1EM_EN_g6d3n6_DMR	16776601	16777000	1	.	400	.
chr1	.	h1EM_EN_g6d3n6_DMR	16781001	16781250	1	.	250	.
chr1	.	h1EM_EN_g6d3n6_DMR	16781601	16781700	1	.	100	.
chr1	.	h1EM_EN_g6d3n6_DMR	16792551	16793400	1	.	850	.
chr1	.	h1EM_EN_g6d3n6_DMR	16793801	16794500	1	.	700	.
chr1	.	h1EM_EN_g6d3n6_DMR	16794851	16795000	1	.	150	.
chr1	.	h1EM_EN_g6d3n6_DMR	16796051	16796850	1	.	800	.
chr1	.	h1EM_EN_g6d3n6_DMR	16801601	16802000	1	.	400	.
chr1	.	h1EM_EN_g6d3n6_DMR	16803851	16807950	1	.	4100	.
chr1	.	h1EM_EN_g6d3n6_DMR	16808751	16809450	1	.	700	.
chr1	.	h1EM_EN_g6d3n6_DMR	16809801	16810400	1	.	600	.
chr1	.	h1EM_EN_g6d3n6_DMR	16818901	16819000	1	.	100	.
chr1	.	h1EM_EN_g6d3n6_DMR	16822001	16823050	1	.	1050	.
chr1	.	h1EM_EN_g6d3n6_DMR	16824901	16825350	1	.	450	.
chr1	.	h1EM_EN_g6d3n6_DMR	16827351	16827500	1	.	150	.
chr1	.	h1EM_EN_g6d3n6_DMR	16827901	16828300	1	.	400	.
chr1	.	h1EM_EN_g6d3n6_DMR	16828751	16830450	1	.	1700	.
chr1	.	h1EM_EN_g6d3n6_DMR	16830801	16831250	1	.	450	.
chr1	.	h1EM_EN_g6d3n6_DMR	16831901	16832050	1	.	150	.
chr1	.	h1EM_EN_g6d3n6_DMR	16832851	16833050	1	.	200	.
chr1	.	h1EM_EN_g6d3n6_DMR	16842101	16842500	1	.	400	.
chr1	.	h1EM_EN_g6d3n6_DMR	16843301	16843550	1	.	250	.
chr1	.	h1EM_EN_g6d3n6_DMR	16843901	16846950	1	.	3050	.
chr1	.	h1EM_EN_g6d3n6_DMR	16861701	16861850	1	.	150	.
chr1	.	h1EM_EN_g6d3n6_DMR	16862251	16863250	1	.	1000	.
chr1	.	h1EM_EN_g6d3n6_DMR	16863601	16864050	1	.	450	.
chr1	.	h1EM_EN_g6d3n6_DMR	16865051	16865150	1	.	100	.
chr1	.	h1EM_EN_g6d3n6_DMR	16865701	16865850	1	.	150	.
chr1	.	h1EM_EN_g6d3n6_DMR	16866451	16867000	1	.	550	.
chr1	.	h1EM_EN_g6d3n6_DMR	16867351	16867500	1	.	150	.
chr1	.	h1EM_EN_g6d3n6_DMR	16869201	16869350	1	.	150	.
chr1	.	h1EM_EN_g6d3n6_DMR	16870151	16870400	1	.	250	.
chr1	.	h1EM_EN_g6d3n6_DMR	16873351	16873600	1	.	250	.
chr1	.	h1EM_EN_g6d3n6_DMR	16878201	16878500	1	.	300	.
chr1	.	h1EM_EN_g6d3n6_DMR	16879051	16880500	1	.	1450	.
chr1	.	h1EM_EN_g6d3n6_DMR	16881351	16882550	1	.	1200	.
chr1	.	h1EM_EN_g6d3n6_DMR	16882951	16883050	1	.	100	.
chr1	.	h1EM_EN_g6d3n6_DMR	16883451	16883850	1	.	400	.
chr1	.	h1EM_EN_g6d3n6_DMR	16888651	16889450	1	.	800	.
chr1	.	h1EM_EN_g6d3n6_DMR	16891801	16892850	1	.	1050	.
chr1	.	h1EM_EN_g6d3n6_DMR	16893401	16893500	1	.	100	.
chr1	.	h1EM_EN_g6d3n6_DMR	16894401	16894550	1	.	150	.
chr1	.	h1EM_EN_g6d3n6_DMR	16898701	16898850	1	.	150	.
chr1	.	h1EM_EN_g6d3n6_DMR	16901751	16902050	1	.	300	.
chr1	.	h1EM_EN_g6d3n6_DMR	16905201	16906250	1	.	1050	.
chr1	.	h1EM_EN_g6d3n6_DMR	16906651	16906950	1	.	300	.
chr1	.	h1EM_EN_g6d3n6_DMR	16907501	16907750	1	.	250	.
chr1	.	h1EM_EN_g6d3n6_DMR	16927251	16928200	1	.	950	.
chr1	.	h1EM_EN_g6d3n6_DMR	16932351	16933100	1	.	750	.
chr1	.	h1EM_EN_g6d3n6_DMR	16937951	16938100	1	.	150	.
chr1	.	h1EM_EN_g6d3n6_DMR	16938701	16938800	1	.	100	.
chr1	.	h1EM_EN_g6d3n6_DMR	16941351	16942000	1	.	650	.
chr1	.	h1EM_EN_g6d3n6_DMR	16945201	16945350	1	.	150	.
chr1	.	h1EM_EN_g6d3n6_DMR	16949501	16949600	1	.	100	.
chr1	.	h1EM_EN_g6d3n6_DMR	16954851	16956950	1	.	2100	.
chr1	.	h1EM_EN_g6d3n6_DMR	16963051	16963150	1	.	100	.
chr1	.	h1EM_EN_g6d3n6_DMR	16964551	16965300	1	.	750	.
chr1	.	h1EM_EN_g6d3n6_DMR	16968301	16969000	1	.	700	.
chr1	.	h1EM_EN_g6d3n6_DMR	16969601	16969700	1	.	100	.
chr1	.	h1EM_EN_g6d3n6_DMR	16970201	16970700	1	.	500	.
chr1	.	h1EM_EN_g6d3n6_DMR	16971851	16972200	1	.	350	.
chr1	.	h1EM_EN_g6d3n6_DMR	16977351	16977900	1	.	550	.
chr1	.	h1EM_EN_g6d3n6_DMR	16984751	16985050	1	.	300	.
chr1	.	h1EM_EN_g6d3n6_DMR	16987201	16987500	1	.	300	.
chr1	.	h1EM_EN_g6d3n6_DMR	16988201	16988800	1	.	600	.
chr1	.	h1EM_EN_g6d3n6_DMR	16989651	16990800	1	.	1150	.
chr1	.	h1EM_EN_g6d3n6_DMR	16991151	16991500	1	.	350	.
chr1	.	h1EM_EN_g6d3n6_DMR	16991951	16992400	1	.	450	.
chr1	.	h1EM_EN_g6d3n6_DMR	16998751	16999500	1	.	750	.
chr1	.	h1EM_EN_g6d3n6_DMR	16999901	17000700	1	.	800	.
chr1	.	h1EM_EN_g6d3n6_DMR	17001251	17001700	1	.	450	.
chr1	.	h1EM_EN_g6d3n6_DMR	17006451	17006650	1	.	200	.
chr1	.	h1EM_EN_g6d3n6_DMR	17007051	17008250	1	.	1200	.
chr1	.	h1EM_EN_g6d3n6_DMR	17008701	17008850	1	.	150	.
chr1	.	h1EM_EN_g6d3n6_DMR	17009651	17009850	1	.	200	.
chr1	.	h1EM_EN_g6d3n6_DMR	17010751	17011100	1	.	350	.
chr1	.	h1EM_EN_g6d3n6_DMR	17013201	17013350	1	.	150	.
chr1	.	h1EM_EN_g6d3n6_DMR	17014451	17014600	1	.	150	.
chr1	.	h1EM_EN_g6d3n6_DMR	17018101	17018650	1	.	550	.
chr1	.	h1EM_EN_g6d3n6_DMR	17019251	17023150	1	.	3900	.
chr1	.	h1EM_EN_g6d3n6_DMR	17037601	17038450	1	.	850	.
chr1	.	h1EM_EN_g6d3n6_DMR	17052351	17052550	1	.	200	.
chr1	.	h1EM_EN_g6d3n6_DMR	17057601	17057900	1	.	300	.
chr1	.	h1EM_EN_g6d3n6_DMR	17064101	17064450	1	.	350	.
chr1	.	h1EM_EN_g6d3n6_DMR	17067051	17067450	1	.	400	.
chr1	.	h1EM_EN_g6d3n6_DMR	17073701	17073850	1	.	150	.
chr1	.	h1EM_EN_g6d3n6_DMR	17074251	17075000	1	.	750	.
chr1	.	h1EM_EN_g6d3n6_DMR	17079351	17079700	1	.	350	.
chr1	.	h1EM_EN_g6d3n6_DMR	17085351	17085500	1	.	150	.
chr1	.	h1EM_EN_g6d3n6_DMR	17093401	17093550	1	.	150	.
chr1	.	h1EM_EN_g6d3n6_DMR	17093901	17095000	1	.	1100	.
chr1	.	h1EM_EN_g6d3n6_DMR	17096601	17097800	1	.	1200	.
chr1	.	h1EM_EN_g6d3n6_DMR	17102901	17103000	1	.	100	.
chr1	.	h1EM_EN_g6d3n6_DMR	17104651	17107750	1	.	3100	.
chr1	.	h1EM_EN_g6d3n6_DMR	17109201	17113500	1	.	4300	.
chr1	.	h1EM_EN_g6d3n6_DMR	17113951	17114350	1	.	400	.
chr1	.	h1EM_EN_g6d3n6_DMR	17114751	17114850	1	.	100	.
chr1	.	h1EM_EN_g6d3n6_DMR	17115451	17117700	1	.	2250	.
chr1	.	h1EM_EN_g6d3n6_DMR	17118551	17118950	1	.	400	.
chr1	.	h1EM_EN_g6d3n6_DMR	17124651	17124800	1	.	150	.
chr1	.	h1EM_EN_g6d3n6_DMR	17128351	17128500	1	.	150	.
chr1	.	h1EM_EN_g6d3n6_DMR	17131601	17131750	1	.	150	.
chr1	.	h1EM_EN_g6d3n6_DMR	17136501	17136700	1	.	200	.
chr1	.	h1EM_EN_g6d3n6_DMR	17138451	17148650	1	.	10200	.
chr1	.	h1EM_EN_g6d3n6_DMR	17154251	17154500	1	.	250	.
chr1	.	h1EM_EN_g6d3n6_DMR	17154951	17155250	1	.	300	.
chr1	.	h1EM_EN_g6d3n6_DMR	17174251	17174650	1	.	400	.
chr1	.	h1EM_EN_g6d3n6_DMR	17179701	17179800	1	.	100	.
chr1	.	h1EM_EN_g6d3n6_DMR	17189551	17189700	1	.	150	.
chr1	.	h1EM_EN_g6d3n6_DMR	17190051	17191050	1	.	1000	.
chr1	.	h1EM_EN_g6d3n6_DMR	17195951	17196450	1	.	500	.
chr1	.	h1EM_EN_g6d3n6_DMR	17200001	17200350	1	.	350	.
chr1	.	h1EM_EN_g6d3n6_DMR	17203401	17203500	1	.	100	.
chr1	.	h1EM_EN_g6d3n6_DMR	17203951	17204250	1	.	300	.
chr1	.	h1EM_EN_g6d3n6_DMR	17219601	17220150	1	.	550	.
chr1	.	h1EM_EN_g6d3n6_DMR	17248701	17249350	1	.	650	.
chr1	.	h1EM_EN_g6d3n6_DMR	17276751	17276900	1	.	150	.
chr1	.	h1EM_EN_g6d3n6_DMR	17280551	17280700	1	.	150	.
chr1	.	h1EM_EN_g6d3n6_DMR	17281151	17281650	1	.	500	.
chr1	.	h1EM_EN_g6d3n6_DMR	17282951	17283100	1	.	150	.
chr1	.	h1EM_EN_g6d3n6_DMR	17284401	17285100	1	.	700	.
chr1	.	h1EM_EN_g6d3n6_DMR	17291501	17291700	1	.	200	.
chr1	.	h1EM_EN_g6d3n6_DMR	17292901	17293250	1	.	350	.
chr1	.	h1EM_EN_g6d3n6_DMR	17297201	17297950	1	.	750	.
chr1	.	h1EM_EN_g6d3n6_DMR	17302651	17302800	1	.	150	.
chr1	.	h1EM_EN_g6d3n6_DMR	17308101	17308550	1	.	450	.
chr1	.	h1EM_EN_g6d3n6_DMR	17314751	17320200	1	.	5450	.
chr1	.	h1EM_EN_g6d3n6_DMR	17320601	17321200	1	.	600	.
chr1	.	h1EM_EN_g6d3n6_DMR	17326301	17326450	1	.	150	.
chr1	.	h1EM_EN_g6d3n6_DMR	17334851	17335950	1	.	1100	.
chr1	.	h1EM_EN_g6d3n6_DMR	17337851	17338150	1	.	300	.
chr1	.	h1EM_EN_g6d3n6_DMR	17343601	17344200	1	.	600	.
chr1	.	h1EM_EN_g6d3n6_DMR	17345001	17345300	1	.	300	.
chr1	.	h1EM_EN_g6d3n6_DMR	17348451	17348550	1	.	100	.
chr1	.	h1EM_EN_g6d3n6_DMR	17352101	17352750	1	.	650	.
chr1	.	h1EM_EN_g6d3n6_DMR	17371751	17371950	1	.	200	.
chr1	.	h1EM_EN_g6d3n6_DMR	17379051	17379650	1	.	600	.
chr1	.	h1EM_EN_g6d3n6_DMR	17380051	17380750	1	.	700	.
chr1	.	h1EM_EN_g6d3n6_DMR	17389251	17389550	1	.	300	.
chr1	.	h1EM_EN_g6d3n6_DMR	17400951	17401400	1	.	450	.
chr1	.	h1EM_EN_g6d3n6_DMR	17404851	17406100	1	.	1250	.
chr1	.	h1EM_EN_g6d3n6_DMR	17406901	17408650	1	.	1750	.
chr1	.	h1EM_EN_g6d3n6_DMR	17415601	17415800	1	.	200	.
chr1	.	h1EM_EN_g6d3n6_DMR	17416301	17417150	1	.	850	.
chr1	.	h1EM_EN_g6d3n6_DMR	17417901	17418700	1	.	800	.
chr1	.	h1EM_EN_g6d3n6_DMR	17424101	17424200	1	.	100	.
chr1	.	h1EM_EN_g6d3n6_DMR	17433251	17433550	1	.	300	.
chr1	.	h1EM_EN_g6d3n6_DMR	17434301	17434500	1	.	200	.
chr1	.	h1EM_EN_g6d3n6_DMR	17442651	17443200	1	.	550	.
chr1	.	h1EM_EN_g6d3n6_DMR	17445051	17445250	1	.	200	.
chr1	.	h1EM_EN_g6d3n6_DMR	17450351	17450850	1	.	500	.
chr1	.	h1EM_EN_g6d3n6_DMR	17451901	17452250	1	.	350	.
chr1	.	h1EM_EN_g6d3n6_DMR	17468301	17468650	1	.	350	.
chr1	.	h1EM_EN_g6d3n6_DMR	17477701	17477950	1	.	250	.
chr1	.	h1EM_EN_g6d3n6_DMR	17482951	17483050	1	.	100	.
chr1	.	h1EM_EN_g6d3n6_DMR	17505101	17505950	1	.	850	.
chr1	.	h1EM_EN_g6d3n6_DMR	17509551	17509700	1	.	150	.
chr1	.	h1EM_EN_g6d3n6_DMR	17512501	17513000	1	.	500	.
chr1	.	h1EM_EN_g6d3n6_DMR	17513501	17513950	1	.	450	.
chr1	.	h1EM_EN_g6d3n6_DMR	17514551	17516750	1	.	2200	.
chr1	.	h1EM_EN_g6d3n6_DMR	17517401	17517900	1	.	500	.
chr1	.	h1EM_EN_g6d3n6_DMR	17543851	17544250	1	.	400	.
chr1	.	h1EM_EN_g6d3n6_DMR	17544851	17546550	1	.	1700	.
chr1	.	h1EM_EN_g6d3n6_DMR	17547101	17550800	1	.	3700	.
chr1	.	h1EM_EN_g6d3n6_DMR	17551301	17552300	1	.	1000	.
chr1	.	h1EM_EN_g6d3n6_DMR	17553501	17555150	1	.	1650	.
chr1	.	h1EM_EN_g6d3n6_DMR	17555501	17555750	1	.	250	.
chr1	.	h1EM_EN_g6d3n6_DMR	17558451	17559150	1	.	700	.
chr1	.	h1EM_EN_g6d3n6_DMR	17565651	17566300	1	.	650	.
chr1	.	h1EM_EN_g6d3n6_DMR	17568251	17568450	1	.	200	.
chr1	.	h1EM_EN_g6d3n6_DMR	17574301	17574500	1	.	200	.
chr1	.	h1EM_EN_g6d3n6_DMR	17575851	17576300	1	.	450	.
chr1	.	h1EM_EN_g6d3n6_DMR	17579601	17580050	1	.	450	.
chr1	.	h1EM_EN_g6d3n6_DMR	17581501	17582150	1	.	650	.
chr1	.	h1EM_EN_g6d3n6_DMR	17595251	17595350	1	.	100	.
chr1	.	h1EM_EN_g6d3n6_DMR	17596001	17596100	1	.	100	.
chr1	.	h1EM_EN_g6d3n6_DMR	17607951	17608350	1	.	400	.
chr1	.	h1EM_EN_g6d3n6_DMR	17609951	17610450	1	.	500	.
chr1	.	h1EM_EN_g6d3n6_DMR	17613801	17614300	1	.	500	.
chr1	.	h1EM_EN_g6d3n6_DMR	17617651	17617850	1	.	200	.
chr1	.	h1EM_EN_g6d3n6_DMR	17626751	17627050	1	.	300	.
chr1	.	h1EM_EN_g6d3n6_DMR	17634951	17635450	1	.	500	.
chr1	.	h1EM_EN_g6d3n6_DMR	17656301	17656400	1	.	100	.
chr1	.	h1EM_EN_g6d3n6_DMR	17658901	17660500	1	.	1600	.
chr1	.	h1EM_EN_g6d3n6_DMR	17662151	17662650	1	.	500	.
chr1	.	h1EM_EN_g6d3n6_DMR	17663201	17663300	1	.	100	.
chr1	.	h1EM_EN_g6d3n6_DMR	17663851	17664100	1	.	250	.
chr1	.	h1EM_EN_g6d3n6_DMR	17668301	17668950	1	.	650	.
chr1	.	h1EM_EN_g6d3n6_DMR	17669801	17670450	1	.	650	.
chr1	.	h1EM_EN_g6d3n6_DMR	17671051	17671750	1	.	700	.
chr1	.	h1EM_EN_g6d3n6_DMR	17685751	17685850	1	.	100	.
chr1	.	h1EM_EN_g6d3n6_DMR	17689001	17690450	1	.	1450	.
chr1	.	h1EM_EN_g6d3n6_DMR	17693651	17694200	1	.	550	.
chr1	.	h1EM_EN_g6d3n6_DMR	17710601	17711000	1	.	400	.
chr1	.	h1EM_EN_g6d3n6_DMR	17713351	17714050	1	.	700	.
chr1	.	h1EM_EN_g6d3n6_DMR	17716551	17717200	1	.	650	.
chr1	.	h1EM_EN_g6d3n6_DMR	17718651	17718800	1	.	150	.
chr1	.	h1EM_EN_g6d3n6_DMR	17721401	17721500	1	.	100	.
chr1	.	h1EM_EN_g6d3n6_DMR	17731151	17731600	1	.	450	.
chr1	.	h1EM_EN_g6d3n6_DMR	17769751	17769900	1	.	150	.
chr1	.	h1EM_EN_g6d3n6_DMR	17817451	17817650	1	.	200	.
chr1	.	h1EM_EN_g6d3n6_DMR	17823001	17823500	1	.	500	.
chr1	.	h1EM_EN_g6d3n6_DMR	17824151	17824850	1	.	700	.
chr1	.	h1EM_EN_g6d3n6_DMR	17825751	17827400	1	.	1650	.
chr1	.	h1EM_EN_g6d3n6_DMR	17828001	17828700	1	.	700	.
chr1	.	h1EM_EN_g6d3n6_DMR	17841551	17842150	1	.	600	.
chr1	.	h1EM_EN_g6d3n6_DMR	17846001	17846150	1	.	150	.
chr1	.	h1EM_EN_g6d3n6_DMR	17848851	17848950	1	.	100	.
chr1	.	h1EM_EN_g6d3n6_DMR	17864701	17865050	1	.	350	.
chr1	.	h1EM_EN_g6d3n6_DMR	17902701	17902950	1	.	250	.
chr1	.	h1EM_EN_g6d3n6_DMR	17903801	17905650	1	.	1850	.
chr1	.	h1EM_EN_g6d3n6_DMR	17906951	17907400	1	.	450	.
chr1	.	h1EM_EN_g6d3n6_DMR	17907851	17908200	1	.	350	.
chr1	.	h1EM_EN_g6d3n6_DMR	17932801	17933350	1	.	550	.
chr1	.	h1EM_EN_g6d3n6_DMR	17940651	17941700	1	.	1050	.
chr1	.	h1EM_EN_g6d3n6_DMR	17942551	17942800	1	.	250	.
chr1	.	h1EM_EN_g6d3n6_DMR	17953751	17953850	1	.	100	.
chr1	.	h1EM_EN_g6d3n6_DMR	17980701	17980850	1	.	150	.
chr1	.	h1EM_EN_g6d3n6_DMR	17982651	17982850	1	.	200	.
chr1	.	h1EM_EN_g6d3n6_DMR	17983301	17984050	1	.	750	.
chr1	.	h1EM_EN_g6d3n6_DMR	18013651	18014050	1	.	400	.
chr1	.	h1EM_EN_g6d3n6_DMR	18022301	18022700	1	.	400	.
chr1	.	h1EM_EN_g6d3n6_DMR	18024401	18025000	1	.	600	.
chr1	.	h1EM_EN_g6d3n6_DMR	18026351	18026450	1	.	100	.
chr1	.	h1EM_EN_g6d3n6_DMR	18032901	18033050	1	.	150	.
chr1	.	h1EM_EN_g6d3n6_DMR	18037201	18037800	1	.	600	.
chr1	.	h1EM_EN_g6d3n6_DMR	18046501	18046700	1	.	200	.
chr1	.	h1EM_EN_g6d3n6_DMR	18051901	18052100	1	.	200	.
chr1	.	h1EM_EN_g6d3n6_DMR	18058451	18058700	1	.	250	.
chr1	.	h1EM_EN_g6d3n6_DMR	18073401	18073700	1	.	300	.
chr1	.	h1EM_EN_g6d3n6_DMR	18087801	18087900	1	.	100	.
chr1	.	h1EM_EN_g6d3n6_DMR	18092651	18094300	1	.	1650	.
chr1	.	h1EM_EN_g6d3n6_DMR	18097301	18099200	1	.	1900	.
chr1	.	h1EM_EN_g6d3n6_DMR	18099601	18099850	1	.	250	.
chr1	.	h1EM_EN_g6d3n6_DMR	18114851	18115000	1	.	150	.
chr1	.	h1EM_EN_g6d3n6_DMR	18130251	18130650	1	.	400	.
chr1	.	h1EM_EN_g6d3n6_DMR	18134051	18134750	1	.	700	.
chr1	.	h1EM_EN_g6d3n6_DMR	18135501	18135750	1	.	250	.
chr1	.	h1EM_EN_g6d3n6_DMR	18158201	18158800	1	.	600	.
chr1	.	h1EM_EN_g6d3n6_DMR	18161401	18161850	1	.	450	.
chr1	.	h1EM_EN_g6d3n6_DMR	18162301	18162600	1	.	300	.
chr1	.	h1EM_EN_g6d3n6_DMR	18167101	18167200	1	.	100	.
chr1	.	h1EM_EN_g6d3n6_DMR	18167701	18168000	1	.	300	.
chr1	.	h1EM_EN_g6d3n6_DMR	18168801	18169150	1	.	350	.
chr1	.	h1EM_EN_g6d3n6_DMR	18193351	18193500	1	.	150	.
chr1	.	h1EM_EN_g6d3n6_DMR	18216051	18216150	1	.	100	.
chr1	.	h1EM_EN_g6d3n6_DMR	18217501	18218250	1	.	750	.
chr1	.	h1EM_EN_g6d3n6_DMR	18230551	18230650	1	.	100	.
chr1	.	h1EM_EN_g6d3n6_DMR	18237901	18238100	1	.	200	.
chr1	.	h1EM_EN_g6d3n6_DMR	18248551	18249100	1	.	550	.
chr1	.	h1EM_EN_g6d3n6_DMR	18273401	18273750	1	.	350	.
chr1	.	h1EM_EN_g6d3n6_DMR	18274701	18274900	1	.	200	.
chr1	.	h1EM_EN_g6d3n6_DMR	18275301	18275850	1	.	550	.
chr1	.	h1EM_EN_g6d3n6_DMR	18284751	18286100	1	.	1350	.
chr1	.	h1EM_EN_g6d3n6_DMR	18292701	18292800	1	.	100	.
chr1	.	h1EM_EN_g6d3n6_DMR	18301151	18301450	1	.	300	.
chr1	.	h1EM_EN_g6d3n6_DMR	18303951	18305350	1	.	1400	.
chr1	.	h1EM_EN_g6d3n6_DMR	18305851	18306200	1	.	350	.
chr1	.	h1EM_EN_g6d3n6_DMR	18312251	18312450	1	.	200	.
chr1	.	h1EM_EN_g6d3n6_DMR	18324551	18325050	1	.	500	.
chr1	.	h1EM_EN_g6d3n6_DMR	18328401	18328850	1	.	450	.
chr1	.	h1EM_EN_g6d3n6_DMR	18329451	18329800	1	.	350	.
chr1	.	h1EM_EN_g6d3n6_DMR	18341901	18342150	1	.	250	.
chr1	.	h1EM_EN_g6d3n6_DMR	18345651	18345900	1	.	250	.
chr1	.	h1EM_EN_g6d3n6_DMR	18359651	18359950	1	.	300	.
chr1	.	h1EM_EN_g6d3n6_DMR	18384001	18384650	1	.	650	.
chr1	.	h1EM_EN_g6d3n6_DMR	18390051	18390150	1	.	100	.
chr1	.	h1EM_EN_g6d3n6_DMR	18394501	18394750	1	.	250	.
chr1	.	h1EM_EN_g6d3n6_DMR	18399101	18400150	1	.	1050	.
chr1	.	h1EM_EN_g6d3n6_DMR	18401551	18402450	1	.	900	.
chr1	.	h1EM_EN_g6d3n6_DMR	18424651	18425100	1	.	450	.
chr1	.	h1EM_EN_g6d3n6_DMR	18427601	18427950	1	.	350	.
chr1	.	h1EM_EN_g6d3n6_DMR	18428301	18428700	1	.	400	.
chr1	.	h1EM_EN_g6d3n6_DMR	18432301	18432400	1	.	100	.
chr1	.	h1EM_EN_g6d3n6_DMR	18439751	18439900	1	.	150	.
chr1	.	h1EM_EN_g6d3n6_DMR	18440901	18441050	1	.	150	.
chr1	.	h1EM_EN_g6d3n6_DMR	18441501	18441850	1	.	350	.
chr1	.	h1EM_EN_g6d3n6_DMR	18453751	18453950	1	.	200	.
chr1	.	h1EM_EN_g6d3n6_DMR	18460551	18461450	1	.	900	.
chr1	.	h1EM_EN_g6d3n6_DMR	18474951	18475750	1	.	800	.
chr1	.	h1EM_EN_g6d3n6_DMR	18497351	18497750	1	.	400	.
chr1	.	h1EM_EN_g6d3n6_DMR	18498951	18499200	1	.	250	.
chr1	.	h1EM_EN_g6d3n6_DMR	18510501	18511250	1	.	750	.
chr1	.	h1EM_EN_g6d3n6_DMR	18531401	18531500	1	.	100	.
chr1	.	h1EM_EN_g6d3n6_DMR	18531851	18532200	1	.	350	.
chr1	.	h1EM_EN_g6d3n6_DMR	18535701	18535800	1	.	100	.
chr1	.	h1EM_EN_g6d3n6_DMR	18538651	18538950	1	.	300	.
chr1	.	h1EM_EN_g6d3n6_DMR	18539701	18540100	1	.	400	.
chr1	.	h1EM_EN_g6d3n6_DMR	18545201	18545350	1	.	150	.
chr1	.	h1EM_EN_g6d3n6_DMR	18553101	18553200	1	.	100	.
chr1	.	h1EM_EN_g6d3n6_DMR	18555201	18556400	1	.	1200	.
chr1	.	h1EM_EN_g6d3n6_DMR	18583251	18584900	1	.	1650	.
chr1	.	h1EM_EN_g6d3n6_DMR	18602551	18602900	1	.	350	.
chr1	.	h1EM_EN_g6d3n6_DMR	18603501	18603650	1	.	150	.
chr1	.	h1EM_EN_g6d3n6_DMR	18604001	18604200	1	.	200	.
chr1	.	h1EM_EN_g6d3n6_DMR	18607151	18607550	1	.	400	.
chr1	.	h1EM_EN_g6d3n6_DMR	18609801	18609950	1	.	150	.
chr1	.	h1EM_EN_g6d3n6_DMR	18611601	18612750	1	.	1150	.
chr1	.	h1EM_EN_g6d3n6_DMR	18618451	18618700	1	.	250	.
chr1	.	h1EM_EN_g6d3n6_DMR	18630551	18631000	1	.	450	.
chr1	.	h1EM_EN_g6d3n6_DMR	18635801	18636350	1	.	550	.
chr1	.	h1EM_EN_g6d3n6_DMR	18636851	18637150	1	.	300	.
chr1	.	h1EM_EN_g6d3n6_DMR	18644501	18646300	1	.	1800	.
chr1	.	h1EM_EN_g6d3n6_DMR	18647851	18648000	1	.	150	.
chr1	.	h1EM_EN_g6d3n6_DMR	18652001	18652700	1	.	700	.
chr1	.	h1EM_EN_g6d3n6_DMR	18656401	18656750	1	.	350	.
chr1	.	h1EM_EN_g6d3n6_DMR	18661251	18662050	1	.	800	.
chr1	.	h1EM_EN_g6d3n6_DMR	18675001	18675350	1	.	350	.
chr1	.	h1EM_EN_g6d3n6_DMR	18749151	18750450	1	.	1300	.
chr1	.	h1EM_EN_g6d3n6_DMR	18751501	18751600	1	.	100	.
chr1	.	h1EM_EN_g6d3n6_DMR	18769501	18770300	1	.	800	.
chr1	.	h1EM_EN_g6d3n6_DMR	18770751	18770850	1	.	100	.
chr1	.	h1EM_EN_g6d3n6_DMR	18771501	18772850	1	.	1350	.
chr1	.	h1EM_EN_g6d3n6_DMR	18773401	18774050	1	.	650	.
chr1	.	h1EM_EN_g6d3n6_DMR	18793851	18794000	1	.	150	.
chr1	.	h1EM_EN_g6d3n6_DMR	18794351	18795650	1	.	1300	.
chr1	.	h1EM_EN_g6d3n6_DMR	18796001	18796600	1	.	600	.
chr1	.	h1EM_EN_g6d3n6_DMR	18811051	18811200	1	.	150	.
chr1	.	h1EM_EN_g6d3n6_DMR	18819901	18820050	1	.	150	.
chr1	.	h1EM_EN_g6d3n6_DMR	18820401	18821250	1	.	850	.
chr1	.	h1EM_EN_g6d3n6_DMR	18863001	18863750	1	.	750	.
chr1	.	h1EM_EN_g6d3n6_DMR	18877801	18878050	1	.	250	.
chr1	.	h1EM_EN_g6d3n6_DMR	18889551	18889650	1	.	100	.
chr1	.	h1EM_EN_g6d3n6_DMR	18891201	18892000	1	.	800	.
chr1	.	h1EM_EN_g6d3n6_DMR	18896151	18896350	1	.	200	.
chr1	.	h1EM_EN_g6d3n6_DMR	18898251	18898500	1	.	250	.
chr1	.	h1EM_EN_g6d3n6_DMR	18909251	18909650	1	.	400	.
chr1	.	h1EM_EN_g6d3n6_DMR	18910701	18911300	1	.	600	.
chr1	.	h1EM_EN_g6d3n6_DMR	18911751	18911850	1	.	100	.
chr1	.	h1EM_EN_g6d3n6_DMR	18934901	18935350	1	.	450	.
chr1	.	h1EM_EN_g6d3n6_DMR	18952001	18952100	1	.	100	.
chr1	.	h1EM_EN_g6d3n6_DMR	18959501	18959650	1	.	150	.
chr1	.	h1EM_EN_g6d3n6_DMR	18960951	18961050	1	.	100	.
chr1	.	h1EM_EN_g6d3n6_DMR	18975251	18975750	1	.	500	.
chr1	.	h1EM_EN_g6d3n6_DMR	18984301	18984950	1	.	650	.
chr1	.	h1EM_EN_g6d3n6_DMR	18985301	18985650	1	.	350	.
chr1	.	h1EM_EN_g6d3n6_DMR	18986151	18987600	1	.	1450	.
chr1	.	h1EM_EN_g6d3n6_DMR	18993151	18993300	1	.	150	.
chr1	.	h1EM_EN_g6d3n6_DMR	19003451	19003550	1	.	100	.
chr1	.	h1EM_EN_g6d3n6_DMR	19009701	19009900	1	.	200	.
chr1	.	h1EM_EN_g6d3n6_DMR	19023301	19023500	1	.	200	.
chr1	.	h1EM_EN_g6d3n6_DMR	19023951	19024100	1	.	150	.
chr1	.	h1EM_EN_g6d3n6_DMR	19025901	19026750	1	.	850	.
chr1	.	h1EM_EN_g6d3n6_DMR	19027301	19027600	1	.	300	.
chr1	.	h1EM_EN_g6d3n6_DMR	19027951	19028650	1	.	700	.
chr1	.	h1EM_EN_g6d3n6_DMR	19030951	19031250	1	.	300	.
chr1	.	h1EM_EN_g6d3n6_DMR	19031951	19032250	1	.	300	.
chr1	.	h1EM_EN_g6d3n6_DMR	19035851	19035950	1	.	100	.
chr1	.	h1EM_EN_g6d3n6_DMR	19042201	19042300	1	.	100	.
chr1	.	h1EM_EN_g6d3n6_DMR	19058901	19059300	1	.	400	.
chr1	.	h1EM_EN_g6d3n6_DMR	19066001	19068300	1	.	2300	.
chr1	.	h1EM_EN_g6d3n6_DMR	19076601	19077650	1	.	1050	.
chr1	.	h1EM_EN_g6d3n6_DMR	19089051	19089500	1	.	450	.
chr1	.	h1EM_EN_g6d3n6_DMR	19138751	19138850	1	.	100	.
chr1	.	h1EM_EN_g6d3n6_DMR	19145851	19145950	1	.	100	.
chr1	.	h1EM_EN_g6d3n6_DMR	19149301	19151250	1	.	1950	.
chr1	.	h1EM_EN_g6d3n6_DMR	19151751	19152300	1	.	550	.
chr1	.	h1EM_EN_g6d3n6_DMR	19175701	19177500	1	.	1800	.
chr1	.	h1EM_EN_g6d3n6_DMR	19201551	19202100	1	.	550	.
chr1	.	h1EM_EN_g6d3n6_DMR	19216151	19216550	1	.	400	.
chr1	.	h1EM_EN_g6d3n6_DMR	19220401	19220850	1	.	450	.
chr1	.	h1EM_EN_g6d3n6_DMR	19221951	19222200	1	.	250	.
chr1	.	h1EM_EN_g6d3n6_DMR	19223301	19224000	1	.	700	.
chr1	.	h1EM_EN_g6d3n6_DMR	19230251	19230350	1	.	100	.
chr1	.	h1EM_EN_g6d3n6_DMR	19235251	19235500	1	.	250	.
chr1	.	h1EM_EN_g6d3n6_DMR	19237601	19237750	1	.	150	.
chr1	.	h1EM_EN_g6d3n6_DMR	19238351	19241000	1	.	2650	.
chr1	.	h1EM_EN_g6d3n6_DMR	19249951	19250100	1	.	150	.
chr1	.	h1EM_EN_g6d3n6_DMR	19251551	19251750	1	.	200	.
chr1	.	h1EM_EN_g6d3n6_DMR	19252101	19253050	1	.	950	.
chr1	.	h1EM_EN_g6d3n6_DMR	19272001	19272550	1	.	550	.
chr1	.	h1EM_EN_g6d3n6_DMR	19276201	19276300	1	.	100	.
chr1	.	h1EM_EN_g6d3n6_DMR	19287551	19287750	1	.	200	.
chr1	.	h1EM_EN_g6d3n6_DMR	19293251	19293500	1	.	250	.
chr1	.	h1EM_EN_g6d3n6_DMR	19294001	19296450	1	.	2450	.
chr1	.	h1EM_EN_g6d3n6_DMR	19307451	19307900	1	.	450	.
chr1	.	h1EM_EN_g6d3n6_DMR	19319951	19320800	1	.	850	.
chr1	.	h1EM_EN_g6d3n6_DMR	19321201	19322100	1	.	900	.
chr1	.	h1EM_EN_g6d3n6_DMR	19322501	19323050	1	.	550	.
chr1	.	h1EM_EN_g6d3n6_DMR	19331001	19332050	1	.	1050	.
chr1	.	h1EM_EN_g6d3n6_DMR	19333601	19334300	1	.	700	.
chr1	.	h1EM_EN_g6d3n6_DMR	19339951	19340650	1	.	700	.
chr1	.	h1EM_EN_g6d3n6_DMR	19356501	19357100	1	.	600	.
chr1	.	h1EM_EN_g6d3n6_DMR	19365251	19365500	1	.	250	.
chr1	.	h1EM_EN_g6d3n6_DMR	19371701	19372300	1	.	600	.
chr1	.	h1EM_EN_g6d3n6_DMR	19376151	19376850	1	.	700	.
chr1	.	h1EM_EN_g6d3n6_DMR	19384201	19384600	1	.	400	.
chr1	.	h1EM_EN_g6d3n6_DMR	19393151	19393650	1	.	500	.
chr1	.	h1EM_EN_g6d3n6_DMR	19395551	19395650	1	.	100	.
chr1	.	h1EM_EN_g6d3n6_DMR	19396001	19396100	1	.	100	.
chr1	.	h1EM_EN_g6d3n6_DMR	19396501	19398200	1	.	1700	.
chr1	.	h1EM_EN_g6d3n6_DMR	19402151	19402450	1	.	300	.
chr1	.	h1EM_EN_g6d3n6_DMR	19403551	19403850	1	.	300	.
chr1	.	h1EM_EN_g6d3n6_DMR	19406951	19408500	1	.	1550	.
chr1	.	h1EM_EN_g6d3n6_DMR	19409001	19409800	1	.	800	.
chr1	.	h1EM_EN_g6d3n6_DMR	19424001	19424350	1	.	350	.
chr1	.	h1EM_EN_g6d3n6_DMR	19425751	19425950	1	.	200	.
chr1	.	h1EM_EN_g6d3n6_DMR	19428501	19428600	1	.	100	.
chr1	.	h1EM_EN_g6d3n6_DMR	19430151	19430600	1	.	450	.
chr1	.	h1EM_EN_g6d3n6_DMR	19432151	19432600	1	.	450	.
chr1	.	h1EM_EN_g6d3n6_DMR	19433751	19434250	1	.	500	.
chr1	.	h1EM_EN_g6d3n6_DMR	19444451	19445000	1	.	550	.
chr1	.	h1EM_EN_g6d3n6_DMR	19449701	19449850	1	.	150	.
chr1	.	h1EM_EN_g6d3n6_DMR	19469251	19469650	1	.	400	.
chr1	.	h1EM_EN_g6d3n6_DMR	19470051	19470200	1	.	150	.
chr1	.	h1EM_EN_g6d3n6_DMR	19476451	19476700	1	.	250	.
chr1	.	h1EM_EN_g6d3n6_DMR	19480201	19480450	1	.	250	.
chr1	.	h1EM_EN_g6d3n6_DMR	19487151	19487500	1	.	350	.
chr1	.	h1EM_EN_g6d3n6_DMR	19489801	19490000	1	.	200	.
chr1	.	h1EM_EN_g6d3n6_DMR	19498751	19498850	1	.	100	.
chr1	.	h1EM_EN_g6d3n6_DMR	19501501	19501850	1	.	350	.
chr1	.	h1EM_EN_g6d3n6_DMR	19530501	19530750	1	.	250	.
chr1	.	h1EM_EN_g6d3n6_DMR	19580701	19580950	1	.	250	.
chr1	.	h1EM_EN_g6d3n6_DMR	19596651	19598300	1	.	1650	.
chr1	.	h1EM_EN_g6d3n6_DMR	19603451	19603550	1	.	100	.
chr1	.	h1EM_EN_g6d3n6_DMR	19606951	19607100	1	.	150	.
chr1	.	h1EM_EN_g6d3n6_DMR	19634351	19634450	1	.	100	.
chr1	.	h1EM_EN_g6d3n6_DMR	19640101	19640250	1	.	150	.
chr1	.	h1EM_EN_g6d3n6_DMR	19658251	19659250	1	.	1000	.
chr1	.	h1EM_EN_g6d3n6_DMR	19679201	19679650	1	.	450	.
chr1	.	h1EM_EN_g6d3n6_DMR	19683651	19683750	1	.	100	.
chr1	.	h1EM_EN_g6d3n6_DMR	19704051	19704450	1	.	400	.
chr1	.	h1EM_EN_g6d3n6_DMR	19708751	19708850	1	.	100	.
chr1	.	h1EM_EN_g6d3n6_DMR	19710301	19710400	1	.	100	.
chr1	.	h1EM_EN_g6d3n6_DMR	19719951	19720150	1	.	200	.
chr1	.	h1EM_EN_g6d3n6_DMR	19720501	19721100	1	.	600	.
chr1	.	h1EM_EN_g6d3n6_DMR	19721451	19722450	1	.	1000	.
chr1	.	h1EM_EN_g6d3n6_DMR	19723501	19724550	1	.	1050	.
chr1	.	h1EM_EN_g6d3n6_DMR	19725751	19726200	1	.	450	.
chr1	.	h1EM_EN_g6d3n6_DMR	19728551	19729600	1	.	1050	.
chr1	.	h1EM_EN_g6d3n6_DMR	19729951	19730550	1	.	600	.
chr1	.	h1EM_EN_g6d3n6_DMR	19732001	19733550	1	.	1550	.
chr1	.	h1EM_EN_g6d3n6_DMR	19735901	19737400	1	.	1500	.
chr1	.	h1EM_EN_g6d3n6_DMR	19738201	19740250	1	.	2050	.
chr1	.	h1EM_EN_g6d3n6_DMR	19745201	19745850	1	.	650	.
chr1	.	h1EM_EN_g6d3n6_DMR	19747551	19748050	1	.	500	.
chr1	.	h1EM_EN_g6d3n6_DMR	19766701	19767300	1	.	600	.
chr1	.	h1EM_EN_g6d3n6_DMR	19769251	19769650	1	.	400	.
chr1	.	h1EM_EN_g6d3n6_DMR	19771551	19771800	1	.	250	.
chr1	.	h1EM_EN_g6d3n6_DMR	19772201	19772600	1	.	400	.
chr1	.	h1EM_EN_g6d3n6_DMR	19773301	19773550	1	.	250	.
chr1	.	h1EM_EN_g6d3n6_DMR	19783851	19784800	1	.	950	.
chr1	.	h1EM_EN_g6d3n6_DMR	19801251	19801900	1	.	650	.
chr1	.	h1EM_EN_g6d3n6_DMR	19802501	19802700	1	.	200	.
chr1	.	h1EM_EN_g6d3n6_DMR	19806901	19807000	1	.	100	.
chr1	.	h1EM_EN_g6d3n6_DMR	19811651	19813650	1	.	2000	.
chr1	.	h1EM_EN_g6d3n6_DMR	19826551	19827300	1	.	750	.
chr1	.	h1EM_EN_g6d3n6_DMR	19878701	19878800	1	.	100	.
chr1	.	h1EM_EN_g6d3n6_DMR	19885701	19886050	1	.	350	.
chr1	.	h1EM_EN_g6d3n6_DMR	19895601	19895800	1	.	200	.
chr1	.	h1EM_EN_g6d3n6_DMR	19912501	19913150	1	.	650	.
chr1	.	h1EM_EN_g6d3n6_DMR	19936501	19937350	1	.	850	.
chr1	.	h1EM_EN_g6d3n6_DMR	19945801	19946000	1	.	200	.
chr1	.	h1EM_EN_g6d3n6_DMR	19946601	19946900	1	.	300	.
chr1	.	h1EM_EN_g6d3n6_DMR	19948301	19949050	1	.	750	.
chr1	.	h1EM_EN_g6d3n6_DMR	19952201	19952450	1	.	250	.
chr1	.	h1EM_EN_g6d3n6_DMR	19997351	19998250	1	.	900	.
chr1	.	h1EM_EN_g6d3n6_DMR	20033301	20033450	1	.	150	.
chr1	.	h1EM_EN_g6d3n6_DMR	20036701	20037250	1	.	550	.
chr1	.	h1EM_EN_g6d3n6_DMR	20066401	20066650	1	.	250	.
chr1	.	h1EM_EN_g6d3n6_DMR	20116401	20116900	1	.	500	.
chr1	.	h1EM_EN_g6d3n6_DMR	20117501	20118050	1	.	550	.
chr1	.	h1EM_EN_g6d3n6_DMR	20122651	20122950	1	.	300	.
chr1	.	h1EM_EN_g6d3n6_DMR	20128951	20129450	1	.	500	.
chr1	.	h1EM_EN_g6d3n6_DMR	20130051	20130450	1	.	400	.
chr1	.	h1EM_EN_g6d3n6_DMR	20135201	20135500	1	.	300	.
chr1	.	h1EM_EN_g6d3n6_DMR	20157951	20158050	1	.	100	.
chr1	.	h1EM_EN_g6d3n6_DMR	20160901	20161000	1	.	100	.
chr1	.	h1EM_EN_g6d3n6_DMR	20170351	20170600	1	.	250	.
chr1	.	h1EM_EN_g6d3n6_DMR	20175701	20176050	1	.	350	.
chr1	.	h1EM_EN_g6d3n6_DMR	20191001	20191700	1	.	700	.
chr1	.	h1EM_EN_g6d3n6_DMR	20194351	20195250	1	.	900	.
chr1	.	h1EM_EN_g6d3n6_DMR	20211651	20212050	1	.	400	.
chr1	.	h1EM_EN_g6d3n6_DMR	20230101	20230400	1	.	300	.
chr1	.	h1EM_EN_g6d3n6_DMR	20276451	20276900	1	.	450	.
chr1	.	h1EM_EN_g6d3n6_DMR	20282201	20282500	1	.	300	.
chr1	.	h1EM_EN_g6d3n6_DMR	20298501	20300000	1	.	1500	.
chr1	.	h1EM_EN_g6d3n6_DMR	20315501	20316050	1	.	550	.
chr1	.	h1EM_EN_g6d3n6_DMR	20324051	20324500	1	.	450	.
chr1	.	h1EM_EN_g6d3n6_DMR	20326151	20326250	1	.	100	.
chr1	.	h1EM_EN_g6d3n6_DMR	20329201	20330000	1	.	800	.
chr1	.	h1EM_EN_g6d3n6_DMR	20332951	20333200	1	.	250	.
chr1	.	h1EM_EN_g6d3n6_DMR	20336401	20337250	1	.	850	.
chr1	.	h1EM_EN_g6d3n6_DMR	20370651	20371250	1	.	600	.
chr1	.	h1EM_EN_g6d3n6_DMR	20394301	20394400	1	.	100	.
chr1	.	h1EM_EN_g6d3n6_DMR	20401201	20401550	1	.	350	.
chr1	.	h1EM_EN_g6d3n6_DMR	20402451	20403550	1	.	1100	.
chr1	.	h1EM_EN_g6d3n6_DMR	20407151	20407400	1	.	250	.
chr1	.	h1EM_EN_g6d3n6_DMR	20435801	20435950	1	.	150	.
chr1	.	h1EM_EN_g6d3n6_DMR	20436651	20437650	1	.	1000	.
chr1	.	h1EM_EN_g6d3n6_DMR	20441401	20441900	1	.	500	.
chr1	.	h1EM_EN_g6d3n6_DMR	20469151	20469400	1	.	250	.
chr1	.	h1EM_EN_g6d3n6_DMR	20470001	20470800	1	.	800	.
chr1	.	h1EM_EN_g6d3n6_DMR	20471151	20471700	1	.	550	.
chr1	.	h1EM_EN_g6d3n6_DMR	20472101	20472700	1	.	600	.
chr1	.	h1EM_EN_g6d3n6_DMR	20473051	20474100	1	.	1050	.
chr1	.	h1EM_EN_g6d3n6_DMR	20492751	20492850	1	.	100	.
chr1	.	h1EM_EN_g6d3n6_DMR	20493451	20493650	1	.	200	.
chr1	.	h1EM_EN_g6d3n6_DMR	20496101	20496650	1	.	550	.
chr1	.	h1EM_EN_g6d3n6_DMR	20502301	20502700	1	.	400	.
chr1	.	h1EM_EN_g6d3n6_DMR	20513801	20514000	1	.	200	.
chr1	.	h1EM_EN_g6d3n6_DMR	20517501	20517700	1	.	200	.
chr1	.	h1EM_EN_g6d3n6_DMR	20528651	20529150	1	.	500	.
chr1	.	h1EM_EN_g6d3n6_DMR	20543201	20543300	1	.	100	.
chr1	.	h1EM_EN_g6d3n6_DMR	20544501	20544750	1	.	250	.
chr1	.	h1EM_EN_g6d3n6_DMR	20551701	20551900	1	.	200	.
chr1	.	h1EM_EN_g6d3n6_DMR	20572751	20573000	1	.	250	.
chr1	.	h1EM_EN_g6d3n6_DMR	20628601	20629100	1	.	500	.
chr1	.	h1EM_EN_g6d3n6_DMR	20653001	20653150	1	.	150	.
[truncated: 9,553 more rows]

## Sheet: endosperm DEGs
Supplemental dataset2. DEGs between h1 endosperm vs wild-type endosperm
	baseMean	log2FoldChange	lfcSE	stat	pvalue	padj	gene description
AT1G04220	1251.12	-1.47946	0.372143	-3.97552	7.02e-05	0.0361602	Encodes KCS2, a member of the 3-ketoacyl-CoA synthase family involved in the biosynthesis of VLCFA (very long chain fatty acids).
AT1G05450	140.159	-10.1618	2.26059	-4.49517	6.95e-06	0.00798846	Encodes a Protease inhibitor/seed storage/LTP family protein
AT1G09550	1850.79	1.59955	0.419691	3.81127	0.00013826	0.0481647	Pectinacetylesterase family protein;(source:Araport11)
AT1G14130	798.53	-1.56974	0.322729	-4.86396	1.15e-06	0.0021921	DAO1 is an IAA oxidase expressed in many different plant parts. it is a member of a family of dioxygenase and 2OG Fe(II) oxygenase domain and DAO domain containing proteins. It appears to be the major IAA oxidase in planta and major contributor to IAA degradation.
AT1G15210	83.945	2.66285	0.577769	4.60884	4.05e-06	0.00551042	pleiotropic drug resistance 7;(source:Araport11)
AT1G17180	15.4573	-6.94496	1.70144	-4.08181	4.47e-05	0.0257988	Encodes glutathione transferase belonging to the tau class of GSTs. Naming convention according to Wagner et al. (2002). Detoxification of the environmental pollutant 2,4,6-trinitrotoluene. Arabidopsis plant over-expressing At1g17180 were more resistant to TNT, removed more TNT from sterile and soil-based media, and had reduced levels of glutathione when grown in the presence of TNT.
AT1G17810	738.784	-1.85385	0.479524	-3.86602	0.00011062	0.0479198	beta-tonoplast intrinsic protein (beta-TIP) mRNA, complete
AT1G21090	504.348	1.43173	0.260614	5.49368	3.94e-08	9.37e-05	Cupredoxin superfamily protein;(source:Araport11)
AT1G22610	81.6644	-21.9473	3.93315	-5.58009	2.4e-08	6.54e-05	C2 calcium/lipid-binding plant phosphoribosyltransferase family protein;(source:Araport11)
AT1G26560	577.074	-1.70786	0.407874	-4.18722	2.82e-05	0.0173553	beta glucosidase 40;(source:Araport11)
AT1G26720	58.3203	-2.77429	0.726404	-3.81921	0.00013388	0.0481647	transmembrane protein;(source:Araport11)
AT1G35210	22.7051	4.09591	0.970527	4.22029	2.44e-05	0.0161642	hypothetical protein;(source:Araport11)
AT1G47620	101.354	4.62098	0.743162	6.21799	5.04e-10	4.8e-06	member of CYP96A
AT1G63120	1433.68	-1.95064	0.505054	-3.86223	0.00011236	0.0479198	AtRBL2 has been identified as a rhomboid protein involved in regulated intramembrane proteolysis (RIP). The enzyme has the proteolytic activity and substrate specificity comparable to the Drosophila Rho-1 protein.
AT1G63140	348.302	1.18207	0.264758	4.46471	8.02e-06	0.00848642	O-methyltransferase family protein;(source:Araport11)
AT1G71691	7983.35	1.73643	0.242546	7.15915	8.12e-13	1.55e-08	GDSL-motif esterase/acyltransferase/lipase. Enzyme group with broad substrate specificity that may catalyze acyltransfer or hydrolase reactions with lipid and non-lipid substrates.
AT1G78940	96.4723	2.2511	0.415396	5.41917	5.99e-08	0.00012675	kinase with adenine nucleotide alpha hydrolases-like domain-containing protein;(source:Araport11)
AT2G01170	332.781	1.03992	0.271192	3.83462	0.00012576	0.0479198	Encodes a bidirectional amino acid transporter that can transport ala, arg, glu and lys, GABA but not pro with both export and import activity. Its expression is localized in the vascular tissues suggesting a function in amino acids export from the phloem into sink tissue.
AT2G23640	100.268	-3.91317	0.915357	-4.27502	1.91e-05	0.0141665	Encodes RTNLB13, a reticulon protein integral to the endoplasmic reticulum (ER) membrane that have the ability to shape the ER into tubules.
AT2G30620	995.165	-1.52679	0.320447	-4.76457	1.89e-06	0.00327801	winged-helix DNA-binding transcription factor family protein;(source:Araport11)
AT2G37360	298.031	-2.86765	0.670425	-4.27737	1.89e-05	0.0141665	Belongs to a clade of five Arabidopsis thaliana ABCG half-transporters that are required for synthesis of an effective suberin barrier in roots and seed coats (ABCG2, ABCG6, and ABCG20) and for synthesis of an intact pollen wall (ABCG1 and ABCG16).
AT2G41170	153.157	-1.53748	0.400018	-3.84352	0.00012128	0.0479198	F-box family protein;(source:Araport11)
AT2G42100	50.1163	-4.49271	1.17694	-3.81727	0.00013494	0.0481647	Actin-like ATPase superfamily protein;(source:Araport11)
AT3G10660	337.804	1.5868	0.269256	5.89326	3.79e-09	1.8e-05	predicted to encode calcium-dependent protein kinase and is localized to the ER. Protein is myristoylated in a cell-free extract. Changing the proposed myristoylated site, G residue in the amino terminal, to A prevented the meristoylation . The G to A mutation decreased AtCPK2 membrane association by approximately 50%.
AT3G12970	284.501	2.0915	0.525019	3.98367	6.79e-05	0.035912	serine/arginine repetitive matrix-like protein;(source:Araport11)
AT3G16860	451.374	1.87041	0.3325	5.62528	1.85e-08	5.88e-05	COBRA-like protein 8 precursor;(source:Araport11)
AT3G23340	54.5321	2.35939	0.525496	4.48983	7.13e-06	0.00798846	Member of CKL gene family (CKL-C group).
AT3G25780	527.775	1.09928	0.263878	4.16586	3.1e-05	0.0184671	Encodes allene oxide cyclase, one of the enzymes involved in jasmonic acid biosynthesis. One of four genes in Arabidopsis that encode this enzyme. mRNA expression is upregulated in senescing leaves. Note: Nomenclature for Arabidopsis allene oxide cyclase 3 (AOC3, AT3G25780) gene is based on Stenzel et al. 2003 Plant Molecular Biology 51:895-911. AOC3 (AT3G25780) is also referred to as AOC2 in He …
AT3G27150	73.9327	2.23586	0.511693	4.36953	1.25e-05	0.0115485	Target gene of MIR2111-5p.
AT3G27210	254.053	1.09015	0.282974	3.85245	0.00011694	0.0479198	hypothetical protein;(source:Araport11)
AT3G46616	29.8101	2.86017	0.725464	3.94254	8.06e-05	0.0393859	hypothetical protein;(source:Araport11)
AT3G51220	14.6524	5.84172	1.52263	3.83659	0.00012475	0.0479198	WEB family protein (DUF827);(source:Araport11)
AT3G51300	803.543	1.0173	0.266944	3.81091	0.00013846	0.0481647	Encodes a pollen-specific Rop GTPase, member of the Rho family of small GTP binding proteins that interacts with RIC3 and RIC4 to control tip growth in pollen tubes. These three proteins promote the proper targeting of exocytic vesicles in the pollen tube tip. ROP1 activity is regulated by the REN1 GTPase activator protein.
AT3G51600	264.967	2.24989	0.526603	4.27246	1.93e-05	0.0141665	Predicted to encode a PR (pathogenesis-related) protein. Belongs to the lipid transfer protein (PR-14) family with the following members: At2g38540/LTP1, At2g38530/LTP2, At5g59320/LTP3, At5g59310/LTP4, At3g51600/LTP5, At3g08770/LTP6, At2g15050/LTP7, At2g18370/LTP8, At2g15325/LTP9, At5g01870/LTP10, At4g33355/LTP11, At3g51590/LTP12, At5g44265/LTP13, At5g62065/LTP14, At4g08530/LTP15.
AT3G53510	1227.3	-3.71966	0.852214	-4.36471	1.27e-05	0.0115485	Belongs to a clade of five Arabidopsis thaliana ABCG half-transporters that are required for synthesis of an effective suberin barrier in roots and seed coats (ABCG2, ABCG6, and ABCG20) and for synthesis of an intact pollen wall (ABCG1 and ABCG16). Phloem-expressed and plasma membrane-localized jasmonate transporter which together with JAT3 and GLR3.3 involved in regulating long-distance transloc…
AT4G16957	134.274	1.93038	0.40995	4.70883	2.49e-06	0.00370285	SUPPRESSOR OF, CONSTITUTIVE protein;(source:Araport11)
AT4G20830	716.785	-1.68891	0.426129	-3.96338	7.39e-05	0.0370484	Encodes an oligogalacturonide oxidase that inactivates the elicitor-active oligogalacturonides (OGs). It is involved in plant immunity. Overexpressing plants are more resistant to B. cinerea.
AT4G24570	714.104	1.65668	0.363229	4.56098	5.09e-06	0.00646708	Encodes one of the mitochondrial dicarboxylate carriers (DIC): DIC1 (AT2G22500), DIC2 (AT4G24570), DIC3 (AT5G09470). The mRNA is cell-to-cell mobile.
AT4G25850	54.6908	4.70344	0.784497	5.99548	2.03e-09	1.29e-05	OSBP(oxysterol binding protein)-related protein 4B;(source:Araport11)
AT4G32980	132.621	1.60334	0.417164	3.84342	0.00012133	0.0479198	Encodes transcription factor involved in photomorphogenesis. Regulates gibberellin biosynthesis. Activated by AGAMOUS in a cal-1, ap1-1 background. Expressed at low levels in developing stamens. Increased levels of ATH1 severely delay flowering in the C24 accession. Most remarkably, ectopically expressed ATH1 hardly had an effect on flowering time in the Col-0 and Ler accessions. ATH1 physically …
AT4G34250	215.554	-7.27601	1.72709	-4.21288	2.52e-05	0.0161642	Encodes KCS16, a member of the 3-ketoacyl-CoA synthase family involved in the biosynthesis of VLCFA (very long chain fatty acids).
AT5G07770	157.264	2.1196	0.482858	4.38969	1.14e-05	0.0113823	Actin-binding FH2 protein;(source:Araport11)
AT5G07800	37.0139	3.64061	0.85057	4.2802	1.87e-05	0.0141665	Flavin-binding monooxygenase family protein;(source:Araport11)
AT5G12020	1249.22	-5.17051	1.32974	-3.88837	0.00010092	0.0468953	17.6 kDa class II heat shock protein;(source:Araport11)
AT5G23790	21.2649	-7.43187	1.93093	-3.84884	0.00011868	0.0479198	Predicted to encode a galactinol synthase.
AT5G35630	983.17	1.03304	0.27115	3.80986	0.00013904	0.0481647	chloroplastic glutamine synthetase The mRNA is cell-to-cell mobile.
AT5G51190	91.7521	9.7797	2.07815	4.70597	2.53e-06	0.00370285	encodes a member of the ERF (ethylene response factor) subfamily B-3 of ERF/AP2 transcription factor family. The protein contains one AP2 domain. There are 18 members in this subfamily including ATERF-1, ATERF-2, AND ATERF-5. Involved in regulating root architecture and the response to cold stress.
AT5G51990	34.7382	2.91958	0.732151	3.98768	6.67e-05	0.035912	encodes a member of the DREB subfamily A-1 of ERF/AP2 transcription factor family (CBF4). The protein contains one AP2 domain. There are six members in this subfamily, including CBF1, CBF2, and CBF3. This gene is involved in response to drought stress and abscisic acid treatment, but not to low temperature.
AT5G52390	51.57	2.48675	0.573975	4.3325	1.47e-05	0.0127669	PAR1 protein;(source:Araport11)
AT5G53870	614.949	2.33036	0.596612	3.90599	9.38e-05	0.0446955	early nodulin-like protein 1;(source:Araport11)
AT5G56540	93.3013	-3.90995	0.68693	-5.69192	1.26e-08	4.79e-05	Encodes arabinogalactan protein (AGP14). Mutants exhibit longer root hairs. The mRNA is cell-to-cell mobile.

## Sheet: embryo DEGs
Supplemental dataset2. DEGs between h1 embryo vs wild-type embryo
	baseMean	log2FoldChange	lfcSE	stat	pvalue	padj	gene description
AT1G05260	3443.34	1.81326	0.362401	5.00345	5.63119e-07	0.00536428	Encodes a cold-inducible cationic peroxidase that is involved in the stress response. In response to low temperature, RCI3 transcripts accumulate in the aerial part and in roots of etiolated seedlings but only in roots of light-grown seedlings. The mRNA is cell-to-cell mobile.
AT1G17870	112.925	-3.50325	0.779134	-4.49634	6.91338e-06	0.0166642	S2P-like putative metalloprotease, also contain transmembrane helices near their C-termini and many of them, five of seven, contain a conserved zinc-binding motif HEXXH. Homolog of EGY1. Each of the EGY1 and EGY-like proteins share two additional highly conserved motifs, the previously reported NPDG motif (aa 442?454 in EGY1, Rudner et al., 1999) and a newly defined GNLR motif (aa 171?179 in EGY1…
AT1G54575	209.191	2.5128	0.579408	4.33684	1.44545e-05	0.0201786	hypothetical protein;(source:Araport11)
AT1G55560	19.3118	-5.85715	1.33168	-4.39833	1.09086e-05	0.0201786	SKU5 similar 14;(source:Araport11)
AT2G29500	1710.42	-7.1177	1.63746	-4.3468	1.38137e-05	0.0201786	HSP20-like chaperones superfamily protein.
AT2G36460	4356.72	-1.84967	0.431203	-4.28956	1.79027e-05	0.0213177	Fructose 1,6-bisphosphate aldolase.
AT2G47180	99.669	-4.98767	1.04694	-4.76406	1.89735e-06	0.00780594	GolS1 is a galactinol synthase that catalyzes the formation of galactinol from UDP-galactose and myo-inositol. GolS1 transcript levels rise in response to methyl viologen, an oxidative damage-inducing agent. Plants over-expressing GolS1 have increased tolerance to salt, chilling, and high-light stress.
AT3G10020	1638.01	-3.37387	0.710502	-4.74857	2.04859e-06	0.00780594	plant/protein;(source:Araport11)
AT3G10660	337.804	1.35452	0.310034	4.36895	1.24843e-05	0.0201786	predicted to encode calcium-dependent protein kinase and is localized to the ER. Protein is myristoylated in a cell-free extract. Changing the proposed myristoylated site, G residue in the amino terminal, to A prevented the meristoylation . The G to A mutation decreased AtCPK2 membrane association by approximately 50%.
AT3G43505	611.958	2.83414	0.656657	4.31602	1.5887e-05	0.0201786	Encodes a member of a family of small,secreted, cysteine rich protein with sequence similarity to the PCP (pollen coat protein) gene family.
AT3G46230	2298.06	-7.2701	1.61782	-4.49377	6.99735e-06	0.0166642	Member of the class I small heat-shock protein (sHSP) family, which accounts for the majority of sHSPs in maturing seeds.Induced by heat, cold, salt, drought and high-light.
AT3G53230	966.837	-1.87559	0.450155	-4.16655	3.0925e-05	0.0346579	CDC48 is induced upon oilseed rape mosaic tobamovirus infection and appears to be involved in controlling virus movement.
AT4G15420	989.087	-2.55546	0.619924	-4.12221	3.75256e-05	0.0397188	Ubiquitin fusion degradation UFD1 family protein;(source:Araport11)
AT4G17940	1936.91	-1.39358	0.298305	-4.67164	2.98799e-06	0.00948787	Tetratricopeptide repeat (TPR)-like superfamily protein;(source:Araport11)
AT4G36990	733.389	-3.14929	0.723509	-4.3528	1.34409e-05	0.0201786	Encodes a protein whose sequence is similar to heat shock factors that regulate the expression of heat shock proteins. Transcript level is increased in response to heat shock. However, overexpression of this gene did not result in the increase of decrease of heat shock proteins.
AT5G10695	446.608	-3.3653	0.777742	-4.32702	1.51143e-05	0.0201786	methionyl-tRNA synthetase;(source:Araport11)
AT5G14130	489.938	-4.28226	0.818346	-5.23282	1.66939e-07	0.00318053	Peroxidase superfamily protein;(source:Araport11)
AT5G50790	1143.91	2.25991	0.460025	4.91259	8.98812e-07	0.00570805	Encodes a member of the SWEET sucrose efflux transporter family proteins. Transcriptionally activated by long photoperiods; activation depends on FT and SOC1. The ectopic expression of SWEET10 causes early flowering and leads to higher levels of transcription of flowering-time related genes in the shoot apex.
